# Supplementary material for: Enantioselective organocatalytic oxidative enamine catalysis–1,5-hydride transfer–cyclization sequences: asymmetric synthesis of tetrahydroquinolines
Source: Royal Society of Chemistry journal article supplement (doi:10.1039/c3cc46710d), 2013-10-26
Supplement: c3cc46710d.pdf [file c3cc46710d.pdf]

## Supporting Information

### Enantioselective Organocatalytic Oxidative Enamine Catalysis/1,5-Hydride Transfer/Cyclization Sequences: Asymmetric Synthesis of Tetrahydroquinolines

Young Ku Kang and Dae Young Kim

*Department of Chemistry, Soonchunhyang University, Asan, Chungnam 336-745, Korea*

#### Contents

|                                                                                                        |           |
|--------------------------------------------------------------------------------------------------------|-----------|
| <b>1.1. General</b> .....                                                                              | <b>S2</b> |
| <b>1.2. Preparation of starting materials</b> .....                                                    | <b>S2</b> |
| <b>2.1. Optimization of the nonchiral reaction conditions</b> .....                                    | <b>S2</b> |
| <b>2.2. General procedure for Oxidative Enamine Catalysis/1,5-Hydride Transfer/Cyclization of 1</b> -- | <b>S2</b> |
| <b>3. Product data</b> .....                                                                           | <b>S3</b> |
| <b>4. Mechanistic studies</b> .....                                                                    | <b>S7</b> |
| <b>7. References</b> .....                                                                             | <b>S7</b> |
| <b>8. NMR spectra and HPLC chromatogram</b> .....                                                      | <b>S8</b> |

## 1.1 General

All commercial reagents and solvents were used without purification. TLC analyses were carried out on pre-coated silica gel plates with  $F_{254}$  indicator. Visualization was accomplished by UV light (254 nm),  $I_2$ , *p*-anisaldehyde, ninhydrin, and phosphomolybdic acid solution as an indicator. Purification of reaction products was carried out by flash chromatography using E. Merck silica gel 60 (230-400 mesh).  $^1H$  NMR and  $^{13}C$  NMR spectra were recorded on a Bruker 400 MHz NMR (400 MHz for  $^1H$ , 100 MHz for  $^{13}C$ ). Chemical shift values ( $\delta$ ) are reported in ppm relative to  $Me_4Si$  ( $\delta$  0.0 ppm). Optical rotations were measured on a JASCO-DIP-1000 digital polarimeter with a sodium lamp. The enantiomeric excesses (ee's) were determined by HPLC. HPLC analysis was performed on Younglin M930 Series and Younglin M720 Series, measured at 254 nm using the indicated chiral column.

## 1.2 Preparation of starting materials

(3-(2-(Dialkylamino)aryl)propanal derivatives were prepared in accordance with literature methods.<sup>1</sup>

## 2.1 Optimization of the nonchiral reaction conditions

In an attempt to validate the feasibility of the proposed organocatalytic oxidative enamine catalysis and intramolecular redox reactions, 3-(2-(azepan-1-yl)phenyl)propanal (**1a**) was reacted in the presence of oxidant and nonchiral secondary amine as an organocatalyst in dichloromethane. The results of a representative selection of oxidative enamine catalysis and intramolecular redox reactions are summarized in Table SI-1. We started the study on the effect of various oxidants for the oxidative coupling reaction of 3-(2-(azepan-1-yl)phenyl)propanal (**1a**) in the presence of pyrrolidinium trifluoromethanesulfonate (20 mol %) as a catalyst in dichloromethane. The reaction gave a moderate yield (55%) when using a 1.0 equiv. of 2,3-dichloro-5,6-dicyanoquinone (DDQ) (Table SI-1, entry 1). Other oxidants including organic and metal oxidants were also used to improve the activity of this reaction. The organic oxidant, such as Dess-Martin periodinane (DMP) and *o*-iodoxybenzoic acid (IBX), could give the desired product in moderate yields (Table SI-1, entries 2-3). However, the reaction of **1a** with metal oxidant such as ceric ammonium nitrate (CAN),  $Pd(OAc)_2/O_2$ , CuBr/TBHP, and  $(bpy)_2RuCl_2/CFL$ , did not occur and the starting **1a** was recovered (Table SI-1, entries 4-7).

**Table SI-1.** Optimization of the reaction conditions.<sup>a</sup>

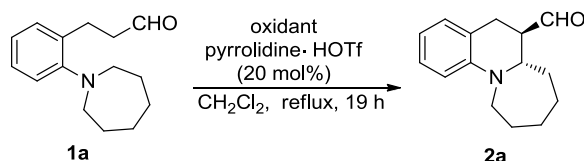

| Entry          | Oxidant                  | Yield (%) <sup>b</sup> | dr (%) <sup>c</sup> |
|----------------|--------------------------|------------------------|---------------------|
| 1              | DDQ                      | 55                     | 1.5:1               |
| 2              | DMP                      | 45                     | 1.5:1               |
| 3              | IBX                      | 38                     | 1.5:1               |
| 4 <sup>d</sup> | CAN                      | n.r.                   |                     |
| 5 <sup>e</sup> | $Pd(OAc)_2/O_2$          | n.r.                   |                     |
| 6 <sup>f</sup> | CuBr/TBHP                | n.r.                   |                     |
| 7 <sup>g</sup> | $(bpy)_3RuCl_2/23$ W CFL | n.r.                   |                     |

<sup>a</sup> Reactions were carried out with **1a** (0.2 mmol), catalyst (20 mol%), oxidant (1.0 equiv.) in  $CH_2Cl_2$  (0.1 M). <sup>b</sup> Combined yield of both diastereomers. <sup>c</sup> Diastereomeric ratio is determined by  $^1H$  NMR spectroscopic analysis. <sup>d</sup> CAN (2.0 equiv.) was used. <sup>e</sup>  $Pd(OAc)_2$  (20 mol%) and  $O_2$  (1 atm) were used. <sup>f</sup> CuBr (20 mol%)/TBHP (1.5 eq, 5.0-6.0 M in decane) was used. <sup>g</sup>  $(bpy)_3RuCl_2$  (20 mol%) was used. n.r.: no reaction, CFL: compact fluorescent light.

## 2.2 General procedure for the catalytic enantioselective 1,5-hydride transfer/ring closure of 1.

To a stirred solution of starting material **1** (0.1 mmol) in  $CHCl_3$  (1.0 mL) was added catalyst **I** (11.9 mg, 0.02 mmol) and DNBS (4.9 mg, 0.02 mmol). After the mixture was stirred for 1 min, IBX (56.0 mg, 0.2 mmol) was added into reaction mixture at room temperature. Reaction mixture was stirred for indicated time, diluted with saturated  $NaHCO_3$  solution (10 mL) and extracted with ethyl acetate ( $2 \times 10$  mL). The combined organic layers were dried over  $MgSO_4$ , filtered, concentrated, and purified by flash chromatography (EtOAc/hexane = 1:10) to afford analytically pure **2**.

### 3. Product data

(6*R*,6*aS*)-5,6,6*a*,7,8,9,10,11-Octahydroazepino[1,2-*a*]quinoline-6-carbaldehyde (**2a**)

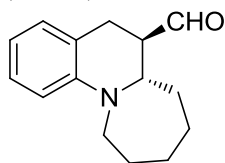

Major diastereomer.  $[\alpha]_{\text{D}}^{28} = -42.2$  ( $c = 0.9$ ,  $\text{CH}_2\text{Cl}_2$ )  $^1\text{H NMR}$  (400 MHz,  $\text{CDCl}_3$ )  $\delta = 9.55$  (s, 1H), 7.06-7.01 (m, 2H), 6.52-6.54 (m, 1H), 6.40-6.48 (m, 1H), 3.85 (dd,  $J = 6.0$  Hz, 3.0 Hz, 1H), 3.82-3.79 (m, 1H), 3.22-3.09 (m, 2H), 3.02 (dd,  $J = 8.0$  Hz, 6.5 Hz, 1H), 2.54-2.52 (m, 1H), 1.81-1.95 (m, 1H), 1.67-1.57 (m, 6H), 1.37-1.34 (m, 1H);  $^{13}\text{C NMR}$  (100 MHz,  $\text{CDCl}_3$ )  $\delta = 203.17$ , 144.90, 129.50, 127.53, 117.15, 115.67, 110.39, 58.26, 49.58, 47.95, 35.02, 26.63, 26.13, 25.94, 23.80; EI-MS :  $m/z=230.1$   $[\text{M}+\text{H}]^+$ ; ESI-HRMS :  $m/z$  calcd for  $\text{C}_{15}\text{H}_{20}\text{NO}$   $[\text{M}+\text{H}]^+$  : 230.1545; found 230.1541; HPLC (95 : 5, *n*-hexane : *i*-PrOH, 254 nm, 0.5 mL/min) Chiralpak IC column,  $t_{\text{R}} = 22.2$  (major),  $t_{\text{R}} = 23.8$  (minor), 93% ee.

(6*R*,6*aS*)-2-Chloro-5,6,6*a*,7,8,9,10,11-octahydroazepino[1,2-*a*]quinoline-6-carbaldehyde (**2b**)

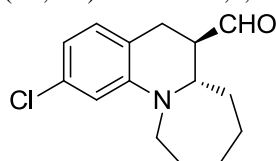

Major diastereomer.  $[\alpha]_{\text{D}}^{28} = -52.2$  ( $c = 1.0$ ,  $\text{CH}_2\text{Cl}_2$ )  $^1\text{H NMR}$  (400 MHz,  $\text{CDCl}_3$ )  $\delta = 9.52$  (s, 1H), 6.95-6.93 (m, 1H), 6.54 (dd,  $J = 8.0$  Hz, 2.0 Hz, 1H), 6.51-6.50 (m, 1H), 3.85-3.76 (m, 2H), 3.21-2.90 (m, 2H), 2.97 (dd,  $J = 17.2$  Hz, 6.4 Hz, 1H), 2.58-2.53 (m, 1H), 2.15-2.04 (m, 1H), 1.80-1.50 (m, 6H), 1.45-1.32 (m, 1H);  $^{13}\text{C NMR}$  (100 MHz,  $\text{CDCl}_3$ )  $\delta = 202.41$ , 144, 76, 133.06, 130.37, 119.85, 115.50, 110.11, 57.90, 49.76, 47.73, 35.10, 26.21, 26.04, 25.84, 23.16; EI-MS :  $m/z=264.1$   $[\text{M}+\text{H}]^+$ ; HPLC (95 : 5, *n*-hexane : *i*-PrOH, 254 nm, 1.0 mL/min) Chiralpak OJ-H column,  $t_{\text{R}} = 10.1$  (minor),  $t_{\text{R}} = 11.0$  (major), 91% ee.

(6*R*,6*aS*)-2-Methoxy-5,6,6*a*,7,8,9,10,11-octahydroazepino[1,2-*a*]quinoline-6-carbaldehyde (**2c**)

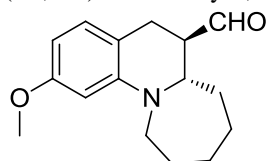

Major diastereomer.  $[\alpha]_{\text{D}}^{28} = -95.3$  ( $c = 1.4$ ,  $\text{CH}_2\text{Cl}_2$ );  $^1\text{H NMR}$  (400 MHz,  $\text{CDCl}_3$ )  $\delta = 9.54$  (s, 1H), 6.96-6.94 (m, 1H), 6.18 (dd,  $J = 8.4$  Hz, 2.4 Hz, 1H), 6.12-6.11 (m, 1H), 3.85-3.79 (m, 2H), 3.79 (s, 3H), 3.20-3.06 (m, 2H), 2.98 (dd,  $J = 16.1$  Hz, 6.0 Hz, 1H), 2.54-2.51 (m, 1H), 2.14-2.04 (m, 1H), 1.74-1.60 (m, 6H), 1.40-1.36 (m, 1H);  $^{13}\text{C NMR}$  (100 MHz,  $\text{CDCl}_3$ )  $\delta = 203.31$ , 159.50, 144.87, 129.98, 110.03, 100.24, 97.02, 58.14, 55.10, 49.68, 48.03, 35.08, 26.50, 26.10, 25.91, 23.14; EI-MS :  $m/z=260.1$   $[\text{M}+\text{H}]^+$ ; HPLC (95 : 5, *n*-hexane : *i*-PrOH, 254 nm, 1.0 mL/min) Chiralpak IC column,  $t_{\text{R}} = 17.6$  (minor),  $t_{\text{R}} = 22.4$  (major), 81% ee.

(6*R*,6*aR*)-6,6*a*,7,8,9,10,11,12-Octahydro-5*H*-azocino[1,2-*a*]quinoline-6-carbaldehyde (**2d**)

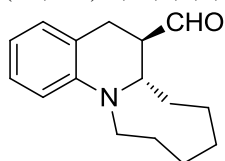

Major diastereomer.  $[\alpha]_{\text{D}}^{28} = 45.2$  ( $c = 1.3$ ,  $\text{CH}_2\text{Cl}_2$ );  $^1\text{H NMR}$  (400 MHz,  $\text{CDCl}_3$ )  $\delta = 9.51$  (d,  $J = 0.8$  Hz, 1H), 7.09-7.04 (m, 2H) 6.62-6.55 (m, 2H), 3.85-3.80 (m, 2H), 3.25-3.21 (m, 1H), 3.21-3.10 (m, 2H), 2.55-2.52 (m, 1H), 1.71-1.32 (m, 10H);  $^{13}\text{C NMR}$  (100 MHz,  $\text{CDCl}_3$ )  $\delta = 203.32$ , 143.98, 129.52, 127.54, 117.37, 115.53, 111.33, 55.45, 53.15, 48.65, 33.90, 27.82, 26.91, 26.26, 26.09, 24.17; EI-MS :  $m/z=244.1$   $[\text{M}+\text{H}]^+$ ; ESI-HRMS :  $m/z$  calcd for  $\text{C}_{16}\text{H}_{22}\text{NO}$   $[\text{M}+\text{H}]^+$  : 244.1701; found 244.1697; HPLC (90 : 10, *n*-hexane : *i*-PrOH, 254 nm, 1.0 mL/min) Chiralpak AS-H column,  $t_{\text{R}} = 16.6$  (major),  $t_{\text{R}} = 27.7$  (minor), 98% ee.

(6*R*,6*aR*)-3-Bromo-6,6*a*,7,8,9,10,11,12-octahydro-5*H*-azocino[1,2-*a*]quinoline-6-carbaldehyde (**2e**)

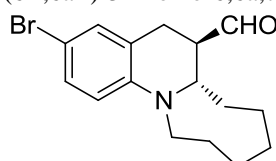

Major diastereomer.  $[\alpha]_{\text{D}}^{28} = 33.4$  ( $c = 1.0$ ,  $\text{CH}_2\text{Cl}_2$ );  $^1\text{H NMR}$  (400 MHz,  $\text{CDCl}_3$ )  $\delta = 9.47$  (s, 1H), 7.14-7.10 (m, 2H), 6.62-6.39 (m, 1H), 3.85-3.80 (m, 1H), 3.74 (dt,  $J = 15.2$  Hz, 4.4 Hz, 1H), 3.23-3.16 (m, 1H), 3.10-3.06 (m, 1H), 3.02 (dd,  $J = 16.8$

Hz, 6.0 Hz, 1H), 2.54-2.51 (m, 1H), 1.95-1.35 (m, 10H);  $^{13}\text{C}$  NMR (100 MHz,  $\text{CDCl}_3$ )  $\delta$  = 202.44, 142.88, 131.84, 130.16, 119.57, 112.90, 107.20, 58.35, 53.21, 48.47, 33.82, 27.79, 26.59, 26.08, 26.05, 23.75; EI-MS :  $m/z=322.0$   $[\text{M}+\text{H}]^+$ ; ESI-HRMS :  $m/z$  calcd for  $\text{C}_{16}\text{H}_{21}\text{BrNO}$   $[\text{M}+\text{H}]^+$  : 322.0807; found 322.0807; HPLC (90 : 10, *n*-hexane : *i*-PrOH, 254 nm, 0.5 mL/min) Chiralpak AS-H column,  $t_R$  = 16.6 (major),  $t_R$  = 22.6 (minor), 99% ee.

(6*R*,6*aR*)-3-(Trifluoromethyl)-6,6*a*,7,8,9,10,11,12-octahydro-5*H*-azocino[1,2-*a*]quinoline-6-carbaldehyde (**2f**)

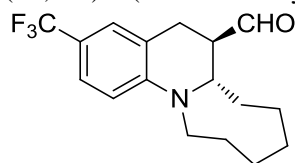

Major diastereomer.  $[\alpha]_D^{28}$  = 27.6 ( $c$  = 0.9,  $\text{CH}_2\text{Cl}_2$ );  $^1\text{H}$  NMR (400 MHz,  $\text{CDCl}_3$ )  $\delta$  = 9.49 (s, 1H), 7.25-7.20 (m, 2H), 6.56-6.54 (m, 1H), 3.89-3.80 (m, 2H), 3.25 (ddd,  $J$  = 14.4 Hz, 10.8 Hz, 3.6 Hz, 1H), 3.17-3.13 (m, 1H), 3.06 (dd,  $J$  = 16.8 Hz, 6.4 Hz, 1H), 2.58 (dt,  $J$  = 6.4 Hz, 2.4 Hz, 1H), 2.00-1.30 (m, 10H);  $^{13}\text{C}$  NMR (100 MHz,  $\text{CDCl}_3$ )  $\delta$  = 202.18, 146.32, 126.50 (q,  $J$  = 3.5 Hz), 124.74 (q,  $J$  = 3.8 Hz), 123.86 (q,  $J$  = 265.5 Hz), 117.19, 116.99 (q,  $J$  = 32.2 Hz), 110.71, 58.62, 53.25, 48.40, 34.08, 27.75, 26.42, 26.01, 25.81, 23.83; EI-MS :  $m/z=312.1$   $[\text{M}+\text{H}]^+$ ; ESI-HRMS :  $m/z$  calcd for  $\text{C}_{17}\text{H}_{21}\text{F}_3\text{NO}$   $[\text{M}+\text{H}]^+$  : 312.1575; found 312.1571; HPLC (98 : 2, *n*-hexane : *i*-PrOH, 254 nm, 1.0 mL/min) Chiralpak AS-H column,  $t_R$  = 10.0 (major),  $t_R$  = 12.7 (minor), 96% ee.

(6*R*,6*aR*)-3-Fluoro-6,6*a*,7,8,9,10,11,12-octahydro-5*H*-azocino[1,2-*a*]quinoline-6-carbaldehyde (**2g**)

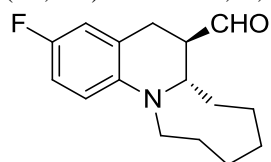

Major diastereomer.  $[\alpha]_D^{28}$  = 36.5 ( $c$  = 0.5,  $\text{CH}_2\text{Cl}_2$ );  $^1\text{H}$  NMR (400 MHz,  $\text{CDCl}_3$ )  $\delta$  = 9.51 (s, 1H), 6.79-6.75 (m, 2H), 6.46-6.43 (m, 1H), 3.84 (dt,  $J$  = 6.4 Hz, 2.4 Hz, 1H), 3.74 (dt,  $J$  = 14.8 Hz, 4.4 Hz, 1H), 3.24-3.20 (m, 1H), 3.12-3.08 (m, 1H), 3.01 (dd,  $J$  = 16.8 Hz, 6.0 Hz, 1H), 2.56-2.53 (m, 1H), 1.95-1.40 (m, 10H);  $^{13}\text{C}$  NMR (100 MHz,  $\text{CDCl}_3$ )  $\delta$  = 201.67, 153.44 (d,  $J$  = 232.7 Hz), 139.21, 114.61 (d,  $J$  = 6.7 Hz), 112.97 (d,  $J$  = 21.8 Hz), 110.70 (d,  $J$  = 21.7 Hz), 57.09, 52.42, 47.65, 32.59, 26.76, 25.83, 25.36, 22.03, 23.00; EI-MS :  $m/z=262.1$   $[\text{M}+\text{H}]^+$ ; HPLC (95 : 5, *n*-hexane : *i*-PrOH, 254 nm, 1.0 mL/min) Chiralpak AS-H column,  $t_R$  = 10.5 (major),  $t_R$  = 13.9 (minor), 97% ee.

(6*R*,6*aR*)-2-Methoxy-6,6*a*,7,8,9,10,11,12-octahydro-5*H*-azocino[1,2-*a*]quinoline-6-carbaldehyde (**2h**)

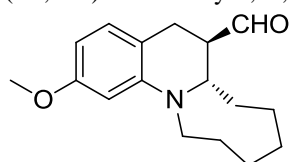

Major diastereomer.  $[\alpha]_D^{28}$  = 36.0 ( $c$  = 1.8,  $\text{CH}_2\text{Cl}_2$ );  $^1\text{H}$  NMR (400 MHz,  $\text{CDCl}_3$ )  $\delta$  = 9.48 (s, 1H), 7.05-7 (m, 1H), 6.15-5.90 (m, 2H), 3.80-3.75 (m, 5H), 3.28-3.21 (m, 1H), 3.02 (dd,  $J$  = 16.4 Hz, 2.4 Hz, 1H), 2.99 (dd,  $J$  = 6.0 Hz, 0.8 Hz, 1H), 2.53-2.51 (m, 1H), 2.00-1.30 (m, 10H);  $^{13}\text{C}$  NMR (100 MHz,  $\text{CDCl}_3$ )  $\delta$  = 203.44, 159.48, 144.96, 129.99, 110.31, 100.26, 97.84, 58.45, 55.09, 53.20, 48.81, 33.97, 27.83, 26.77, 26.18, 26.09, 23.51; EI-MS :  $m/z=274.1$   $[\text{M}+\text{H}]^+$ ; HPLC (90 : 10, *n*-hexane : *i*-PrOH, 254 nm, 1.0 mL/min) Chiralpak IC column,  $t_R$  = 10.0 (major),  $t_R$  = 13.9 (minor), 95% ee.

(6*R*,6*aS*)-5,6,6*a*,7,8,9,10,11,12,13-Decahydroazonino[1,2-*a*]quinoline-6-carbaldehyde (**2i**)

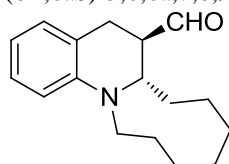

Major diastereomer.  $[\alpha]_D^{28}$  = -145.8 ( $c$  = 1.0,  $\text{CH}_2\text{Cl}_2$ );  $^1\text{H}$  NMR (400 MHz,  $\text{CDCl}_3$ )  $\delta$  = 9.83 (d,  $J$  = 0.8 Hz, 1H), 7.14-7.07 (m, 2H), 6.80-6.77 (m, 1H), 6.70 (td,  $J$  = 7.2 Hz, 1.2 Hz, 1H), 3.76 (dt,  $J$  = 10.8 Hz, 2.4 Hz, 1H), 3.67 (ddd,  $J$  = 14.8 Hz, 8.0 Hz, 3.6 Hz, 1H), 3.22 (ddd,  $J$  = 14.8 Hz, 6.8 Hz, 3.6 Hz, 1H), 3.05-2.98 (m, 1H), 2.87 (dd,  $J$  = 16.8 Hz, 5.6 Hz, 1H), 2.70-2.65 (m, 1H), 1.84-1.10 (m, 12H);  $^{13}\text{C}$  NMR (100 MHz,  $\text{CDCl}_3$ )  $\delta$  = 203.24, 144.98, 129.78, 127.36, 120.32, 117.05, 115.26, 58.89, 56.80, 48.00, 28.88, 27.62, 27.26, 25.45, 25.11, 24.75, 23.33; EI-MS :  $m/z=258.1$   $[\text{M}+\text{H}]^+$ ; ESI-HRMS :  $m/z$  calcd for  $\text{C}_{17}\text{H}_{24}\text{NO}$   $[\text{M}+\text{H}]^+$  : 258.1861; found 258.1858; HPLC (97 : 3, *n*-hexane : *i*-PrOH, 254 nm, 1.0 mL/min) Chiralpak AS-H column,  $t_R$  = 6.41 (major),  $t_R$  = 7.21 (minor), 98% ee.

(6*R*,6*aS*)-3-Bromo-5,6,6*a*,7,8,9,10,11,12,13-decahydroazonino[1,2-*a*]quinoline-6-carbaldehyde (**2j**)

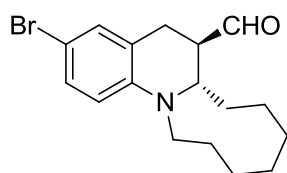

Major diastereomer.  $[\alpha]_D^{28} = -51.8$  ( $c = 1.0$ ,  $\text{CH}_2\text{Cl}_2$ );  $^1\text{H NMR}$  (400 MHz,  $\text{CDCl}_3$ )  $\delta = 9.81$  (d,  $J = 0.8$  Hz, 1H), 7.19-7.17 (m, 2H), 6.65-6.62 (m, 1H), 3.76 (dt,  $J = 10.4$  Hz, 2.8 Hz, 1H), 3.61 (ddd,  $J = 14.8$  Hz, 7.6 Hz, 3.2 Hz, 1H), 3.21 (ddd,  $J = 14.8$  Hz, 6.8 Hz, 3.2 Hz, 1H), 3.01 (dd,  $J = 16.8$  Hz, 13.6 Hz, 1H), 2.82 (dd,  $J = 17.2$  Hz, 5.6 Hz, 1H), 2.67-2.61 (m, 1H), 1.90-1.10 (m, 12H);  $^{13}\text{C NMR}$  (100 MHz,  $\text{CDCl}_3$ )  $\delta = 202.46, 143.95, 132.07, 130.11, 122.40, 116.58, 108.80, 58.92, 56.75, 47.82, 28.81, 27.46, 27.10, 25.51, 25.16, 24.74, 23.15$ ; EI-MS :  $m/z=336.0$   $[\text{M}+\text{H}]^+$ ; HPLC (95 : 5, *n*-hexane : *i*-PrOH, 254 nm, 1.0 mL/min) Chiralpak AS-H column,  $t_R = 8.41$  (major),  $t_R = 9.71$  (minor), 91% ee.  
(6*R*,6*aS*)-3-(Trifluoromethyl)-5,6,6*a*,7,8,9,10,11,12,13-decahydroazonino[1,2-*a*]quinoline-6-carbaldehyde (**2k**)

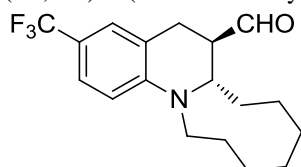

Major diastereomer.  $[\alpha]_D^{28} = -41.5$  ( $c = 1.2$ ,  $\text{CH}_2\text{Cl}_2$ );  $^1\text{H NMR}$  (400 MHz,  $\text{CDCl}_3$ )  $\delta = 9.50$  (s, 1H), 7.30-7.28 (m, 2H), 6.66-6.64 (m, 1H), 3.92-3.88 (m, 1H), 3.72 (ddd,  $J = 12.4$  Hz, 6.4 Hz, 3.2 Hz, 1H), 3.27 (ddd,  $J = 15.2$  Hz, 7.6 Hz, 3.2 Hz, 1H), 3.18-3.14 (m, 1H), 3.12-3.10 (m, 1H), 2.61 (dt,  $J = 6.4$  Hz, 2.4 Hz, 1H), 1.90-1.30 (m, 12H);  $^{13}\text{C NMR}$  (100 MHz,  $\text{CDCl}_3$ )  $\delta = 202.31, 147.19, 126.57$  (q,  $J = 3.6$  Hz), 124.60 (q,  $J = 4.1$  Hz), 123.81 (q,  $J = 265.2$ ), 117.19, 116.99 (q,  $J = 32.2$  Hz), 110.71, 59.84, 56.65, 48.75, 33.22, 30.92, 27.69, 26.57, 26.39, 25.35, 23.75; EI-MS :  $m/z=326.1$   $[\text{M}+\text{H}]^+$ ; HPLC (97 : 3, *n*-hexane : *i*-PrOH, 254 nm, 1.0 mL/min) Chiralpak IB column,  $t_R = 8.51$  (minor),  $t_R = 8.91$  (major), 95% ee.

(6*R*,6*aS*)-2-Chloro-5,6,6*a*,7,8,9,10,11,12,13-decahydroazonino[1,2-*a*]quinoline-6-carbaldehyde (**2l**)

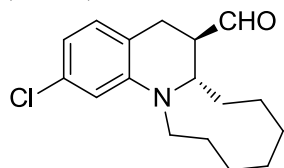

Major diastereomer.  $[\alpha]_D^{28} = -129.4$  ( $c = 0.8$ ,  $\text{CH}_2\text{Cl}_2$ );  $^1\text{H NMR}$  (400 MHz,  $\text{CDCl}_3$ )  $\delta = 9.81$  (d,  $J = 0.4$  Hz, 1H), 6.98-6.96 (m, 1H), 6.72-6.70 (m, 1H), 6.64 (dd,  $J = 8.0$  Hz, 2.0 Hz, 1H), 3.77 (dt,  $J = 10.8$  Hz, 2.4 Hz, 1H), 3.64 (ddd,  $J = 15.2$  Hz, 7.2 Hz, 3.6 Hz, 1H), 3.22 (ddd,  $J = 14.8$  Hz, 7.2 Hz, 3.6 Hz, 1H), 3.02-2.94 (m, 1H), 2.82 (dd,  $J = 17.2$  Hz, 5.6 Hz, 1H), 2.64 (ddd,  $J = 13.6$  Hz, 5.2 Hz, 4 Hz, 1H), 1.90-1.10 (m, 12H);  $^{13}\text{C NMR}$  (100 MHz,  $\text{CDCl}_3$ )  $\delta = 202.53, 145.92, 132.75, 130.66, 118.62, 116.85, 114.40, 58.98, 56.75, 48.11, 29.06, 27.40, 17.10, 25.60, 25.24, 24.77, 22.87$ ; EI-MS :  $m/z=292.1$   $[\text{M}+\text{H}]^+$ ; HPLC (97 : 3, *n*-hexane : *i*-PrOH, 254 nm, 1.0 mL/min) Chiralpak AS-H column,  $t_R = 7.80$  (major),  $t_R = 8.76$  (minor), 98% ee.

(6*R*,6*aS*)-3-Fluoro-5,6,6*a*,7,8,9,10,11,12,13-decahydroazonino[1,2-*a*]quinoline-6-carbaldehyde (**2m**)

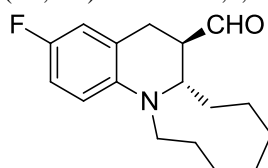

Major diastereomer.  $[\alpha]_D^{28} = -85.4$  ( $c = 1.0$ ,  $\text{CH}_2\text{Cl}_2$ );  $^1\text{H NMR}$  (400 MHz,  $\text{CDCl}_3$ )  $\delta = 9.82$  (d,  $J = 0.4$  Hz, 1H), 6.86-6.77 (m, 2H), 6.71 (dd,  $J = 8.8$  Hz, 4.8 Hz, 1H), 3.75 (dt,  $J = 11.2$  Hz, 2.8 Hz, 1H), 3.54 (ddd,  $J = 14.8$  Hz, 8.4 Hz, 3.6 Hz, 1H), 3.21 (ddd,  $J = 14.8$  Hz, 6.4 Hz, 3.2 Hz, 1H), 3.03 (dd,  $J = 16.4$  Hz, 13.6 Hz, 1H), 2.82 (dd,  $J = 16.8$  Hz, 5.2 Hz, 1H), 2.70-2.64 (m, 1H), 1.90-1.25 (m, 11H), 1.15-1.05 (m, 1H);  $^{13}\text{C NMR}$  (100 MHz,  $\text{CDCl}_3$ )  $\delta = 202.77, 155.38$  (d,  $J = 234.7$  Hz), 141.38, 121.78 (d,  $J = 7.1$  Hz), 116.55 (d,  $J = 8.4$  Hz), 115.62 (d,  $J = 21.7$  Hz), 114.08 (d,  $J = 22.0$  Hz), 58.20, 57.21, 47.47, 28.52, 27.53, 27.44, 24.89, 24.55, 24.31, 23.38; EI-MS :  $m/z=276.1$   $[\text{M}+\text{H}]^+$ ; HPLC (97 : 3, *n*-hexane : *i*-PrOH, 254 nm, 1.0 mL/min) Chiralpak AS-H column,  $t_R = 7.43$  (major),  $t_R = 8.91$  (minor), 96% ee.

(6*R*,6*aS*)-2-Methoxy-5,6,6*a*,7,8,9,10,11,12,13-decahydroazonino[1,2-*a*]quinoline-6-carbaldehyde (**2n**)

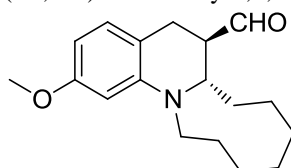

Major diastereomer. [ $\alpha$ ]<sub>D</sub><sup>28</sup> = -108.6 (c = 1.4, CH<sub>2</sub>Cl<sub>2</sub>); <sup>1</sup>H NMR (400 MHz, CDCl<sub>3</sub>)  $\delta$  = 9.81 (d, *J* = 0.8 Hz, 1H), 7.00-6.98 (m, 1H), 6.31-6.29 (m, 2H), 3.78 (s, 3H), 3.73-3.64 (m, 2H), 3.22 (ddd, *J* = 15.2 Hz, 7.2 Hz, 3.6 Hz, 1H), 3.00-2.94 (m, 2H), 2.82 (dd, *J* = 16.0 Hz, 5.2 Hz, 2.68-2.63 (m, 1H), 1.90-1.10 (m, 12H); <sup>13</sup>C NMR (100 MHz, CDCl<sub>3</sub>)  $\delta$  = 203.38, 159.33, 146.03, 130.37, 113.17, 102.23, 101.07, 59.31, 56.92, 55.20, 48.64, 29.14 27.76, 26.78, 25.75, 25.36, 24.98, 22.81; EI-MS : *m/z*=288.1 [M+H]<sup>+</sup>; HPLC (95 : 5, *n*-hexane : *i*-PrOH, 254 nm, 1.0 mL/min) Chiralpak AS-H column, *t*<sub>R</sub> = 7.40 (major), *t*<sub>R</sub> = 8.43 (minor), 98% ee.

(3*aS*,4*R*)-1,2,3,3*a*,4,5-Hexahydropyrrolo[1,2-*a*]quinoline-4-carbaldehyde (**2o**)

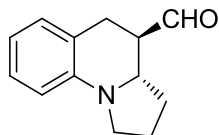

Major diastereoisomer. [ $\alpha$ ]<sub>D</sub><sup>25</sup> = -14 (c = 1.0, CHCl<sub>3</sub>); <sup>1</sup>H NMR (400 MHz, CDCl<sub>3</sub>)  $\delta$  = 9.91 (d, *J* = 2.0 Hz, 1H), 7.13-7.05 (m, 1H), 7.10 (d, *J* = 1.6 Hz, 1H), 6.60-6.60 (m, 1H), 6.46 (d, *J* = 8.0 Hz, 1H), 3.50 (ddd, *J* = 10.4 Hz, 10.1 Hz, 4.9 Hz, 1H), 3.32 (ddd, *J* = 11.1 Hz, 8.9 Hz, 2.1 Hz, 1H), 3.23-3.20 (m, 1H), 2.93-2.91 (m, 2H), 2.50-2.44 (m, 1H), 2.33-2.31 (m, 1H), 2.16-2.10 (m, 1H), 1.99-1.97 (m, 1H), 1.58-1.57 (m, 1H); <sup>13</sup>C NMR (100 MHz, CDCl<sub>3</sub>)  $\delta$  = 202.99, 143.89, 128.70, 127.76, 119.06, 115.48, 110.45, 57.75, 50.35, 46.64, 31.62, 28.59, 24.02; EI-MS : *m/z*=202.1 [M+H]<sup>+</sup>; ESI-HRMS : *m/z* calcd for C<sub>13</sub>H<sub>16</sub>NO [M+H]<sup>+</sup> : 202.1232; found 202.1238; HPLC (98 : 2, *n*-hexane : *i*-PrOH, 254 nm, 1.0 mL/min) Chiralpak IC column, *t*<sub>R</sub> = 10.3 (minor), *t*<sub>R</sub> = 10.8 (major), 87% ee.

(3*aS*,4*R*)-8-chloro-1,2,3,3*a*,4,5-Hexahydropyrrolo[1,2-*a*]quinoline-4-carbaldehyde (**2p**)

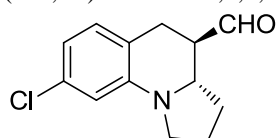

Major diastereoisomer. [ $\alpha$ ]<sub>D</sub><sup>25</sup> = -19 (c = 1.0, CHCl<sub>3</sub>) <sup>1</sup>H NMR (400 MHz, CDCl<sub>3</sub>)  $\delta$  = 9.91 (d, *J* = 2.0 Hz, 1H), 6.95-6.93 (m, 1H), 6.55 (dd, *J* = 8.0 Hz, 2.0 Hz, 1H), 6.41-6.40 (m, 1H), 3.48 (ddd, *J* = 15.2 Hz, 10.8 Hz, 5.2 Hz, 1H), 3.36 (ddd, *J* = 10.8 Hz, 8.8 Hz, 1.6 Hz, 1H), 3.18 (ddd, *J* = 16.8 Hz, 9.2 Hz, 7.2 Hz, 1H), 2.95-2.81 (m, 2H), 2.44-2.32 (m, 2H), 2.19-2.12 (m, 1H), 2.05-1.92 (m, 1H), 1.62-1.55 (m, 1H); <sup>13</sup>C NMR (100 MHz, CDCl<sub>3</sub>)  $\delta$  = 202.60, 150.04, 133.34, 129.60, 121.51, 115.19, 110.15, 57.81, 50.44, 46.78, 31.76, 28.29, 24.14; EI-MS : *m/z*=236.0 [M+H]<sup>+</sup>; HPLC (97 : 3, *n*-hexane : *i*-PrOH, 254 nm, 1.0 mL/min) Chiralpak IC column, *t*<sub>R</sub> = 11.1 (minor), *t*<sub>R</sub> = 11.4 (major), 90% ee.]

(4*aS*,5*R*)-2,3,4,4*a*,5,6-Hexahydro-1*H*-pyrido[1,2-*a*]quinoline-5-carbaldehyde (**2q**)

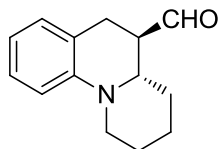

Major diastereomer. [ $\alpha$ ]<sub>D</sub><sup>28</sup> = -50.6 (c = 0.5, CH<sub>2</sub>Cl<sub>2</sub>); <sup>1</sup>H NMR (400 MHz, CDCl<sub>3</sub>)  $\delta$  = 9.63 (d, *J* = 1.6 Hz, 1H), 7.10 (td, *J* = 8.4 Hz, 1.6 Hz, 1H), 7.03-7.01 (m, 1H), 6.78-6.76 (m, 1H), 6.67 (td, *J* = 7.2 Hz, 0.8 Hz, 1H), 3.95-3.91 (m, 1H), 3.45 (ddd, *J* = 10.8 Hz, 5.2 Hz, 2.0 Hz, 1H), 2.99 (dd, *J* = 15.2 Hz, 6.4 Hz, 1H), 2.90-2.84 (m, 2H), 2.63-2.58 (m, 1H), 1.90-1.50 (m, 6H); <sup>13</sup>C NMR (100 MHz, CDCl<sub>3</sub>)  $\delta$  = 202.72, 145.73, 128.89, 127.65, 122.10, 117.62, 112.60, 56.53, 52.01, 48.39, 31.26, 25.99, 24.98, 24.06; EI-MS : *m/z*=216.1 [M+H]<sup>+</sup>; HPLC (90 : 10, *n*-hexane : *i*-PrOH, 254 nm, 0.5 mL/min) Chiralpak AS-H column, *t*<sub>R</sub> = 21.3 (major), *t*<sub>R</sub> = 27.9 (minor), 80% ee.

(11*bR*,12*R*)-7,11*b*,12,13-Tetrahydro-6*H*-isoquinolino[2,1-*a*]quinoline-12-carbaldehyde (**2r**)

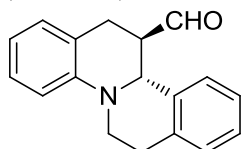

Major diastereomer. <sup>1</sup>H NMR (400 MHz, CDCl<sub>3</sub>)  $\delta$  = 9.40 (s, 1H), 7.35-7.20 (m, 2H), 7.25-7.20 (m, 2H), 7.14-7.11 (m, 2H), 6.86-6.80 (m, 1H), 6.79 (td, *J* = 7.2 Hz, 0.8 Hz, 1H), 4.66-4.67 (m, 1H), 4.02-3.99 (m, 1H), 3.42 (d, *J* = 15.6 Hz, 1H), 3.29 (dt, *J* = 7.2 Hz, 1.6 Hz, 1H), 3.17 (dd, *J* = 16.4 Hz, 6.8 Hz, 1H), 3.08-3.04 (m, 1H), 3.02-2.99 (m, 1H), 2.93-2.89 (m, 1H); <sup>13</sup>C NMR (100 MHz, CDCl<sub>3</sub>)  $\delta$  = 202.02, 146.38, 135.36, 134.98, 129.86, 128.81, 126.95, 126.83, 126.24, 121.32, 118.87, 112.11 (one aromatic carbon missing), 57.61, 51.21, 42.06, 29.89, 27.67; EI-MS : *m/z*=264.1 [M+H]<sup>+</sup>;

(12b*R*,13*R*)-6,7,8,12b,13,14-Hexahydrobenzo[3,4]azepino[1,2-a]quinoline-13-carbaldehyde (**2s**)

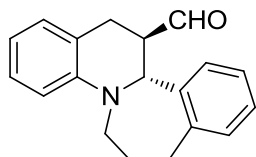

Major diastereomer.  $^1\text{H NMR}$  (400 MHz,  $\text{CDCl}_3$ )  $\delta$  = 9.64 (d,  $J$  = 1.6 Hz, 1H), 7.18-7.02 (m, 6H), 6.67-6.58 (m, 2H), 5.05 (d,  $J$  = 6.4 Hz, 1H), 2.99-2.90 (m, 2H), 2.65 (dt,  $J$  = 14 Hz, 4.8 Hz, 1H), 2.27-2.19 (m, 1H), 1.68-1.61 (m, 1H);  $^{13}\text{C NMR}$  (100 MHz,  $\text{CDCl}_3$ )  $\delta$  = 203.02, 143.42, 139.63, 139.28, 130.80, 129.28, 127.86, 127.65, 127.16, 126.54, 119.34, 116.07, 110.66, 63.26, 49.49, 46.33, 31.88, 26.72, 24.73; EI-MS :  $m/z$ =278.1  $[\text{M}+\text{H}]^+$ .

(12b*R*,13*R*)-2-Fluoro-6,7,8,12b,13,14-hexahydrobenzo[3,4]azepino[1,2-a]quinoline-13-carbaldehyde (**2t**)

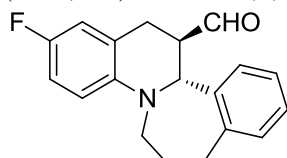

Major diastereomer.  $^1\text{H NMR}$  (400 MHz,  $\text{CDCl}_3$ )  $\delta$  = 9.65 (d,  $J$  = 0.8 Hz, 1H), 7.17-7.11 (m, 4H), 6.78-6.72 (m, 2H), 6.55-6.52 (m, 1H), 5.07 (d,  $J$  = 5.6 Hz, 1H), 3.85 (ddd,  $J$  = 15.2 Hz, 5.2 Hz, 1.6 Hz, 1H), 3.32 (ddd,  $J$  = 16.8 Hz, 12.0 Hz, 5.2 Hz, 1H), 3.23-3.13 (m, 2H), 3.00-2.87 (m, 2H), 2.72 (ddd,  $J$  = 14.4 Hz, 6.0 Hz, 4.0 Hz, 1H), 2.22-2.12 (m, 1H), 1.71-1.63 (m, 1H);  $^{13}\text{C NMR}$  (100 MHz,  $\text{CDCl}_3$ )  $\delta$  = 202.42, 154.82 (d,  $J$  = 233.5 Hz), 140.03, 139.84, 139.42, 130.84, 127.83, 126.89, 126.51, 120.88 (d,  $J$  = 7.0 Hz), 115.66 (d,  $J$  = 22.0 Hz), 113.74 (d,  $J$  = 21.5 Hz), 111.42 (d,  $J$  = 7.4 Hz), 62.34, 49.38, 47.70, 32.59, 25.99, 24.55; EI-MS :  $m/z$ =296.1  $[\text{M}+\text{H}]^+$ .

#### 4. Mechanistic studies

To obtain information on the reaction pathway, we investigated the reaction of 3-(2-(azepan-1-yl)phenyl)propanal (**1a**) in the presence of catalyst **I** (20 mol %) and (-)-camphorsulfonic acid (CSA) in  $\text{CDCl}_3$ . After 1 d,  $^1\text{H NMR}$  analysis of the reaction mixture revealed the formation of 3-(2-(azepan-1-yl)phenyl)propenal (**1a'**) as reaction intermediate. This result indicates that the saturated aldehyde **1a** is converted *in situ* into the corresponding  $\alpha,\beta$ -unsaturated aldehyde **1a'** through oxidative enamine catalysis. Based on this experimental result, we proposed the reaction mechanism that the saturated aldehyde is converted *in situ* into the corresponding  $\alpha,\beta$ -unsaturated aldehyde which can then be manipulated with 1,5-hydride transfer/cyclization towards the asymmetric synthesis of tetrahydroquinolines as shown in Scheme 1.

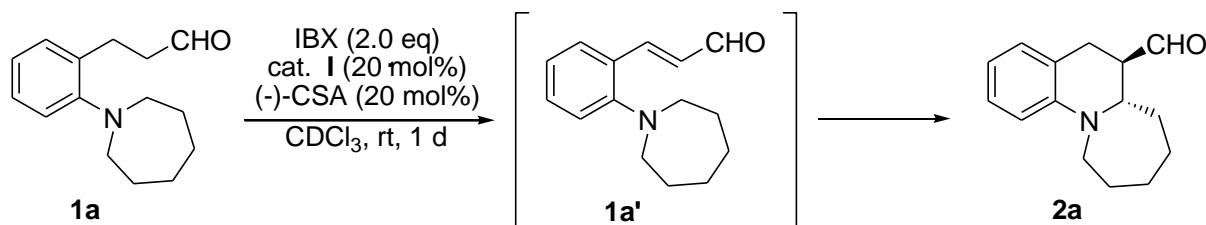

#### 5. References

- (a) Murarka, S.; Zhang, C.; Konieczynska, M. D.; Seidel, D. *Org. Lett.* **2009**, *11*, 129. (b) Murarka, S.; Deb, I.; Zhang, C.; Seidel, D. *J. Am. Chem. Soc.* **2009**, *131*, 13226. (c) Kohler, E. P.; Chadwell, H. M. *Org. Synth.* **1941**, *1*, 78. (d) Brown, H. C.; Hess, H. M. *J. Org. Chem.* **1969**, *34*, 2206.

## 6. NMR spectra and HPLC chromatogram

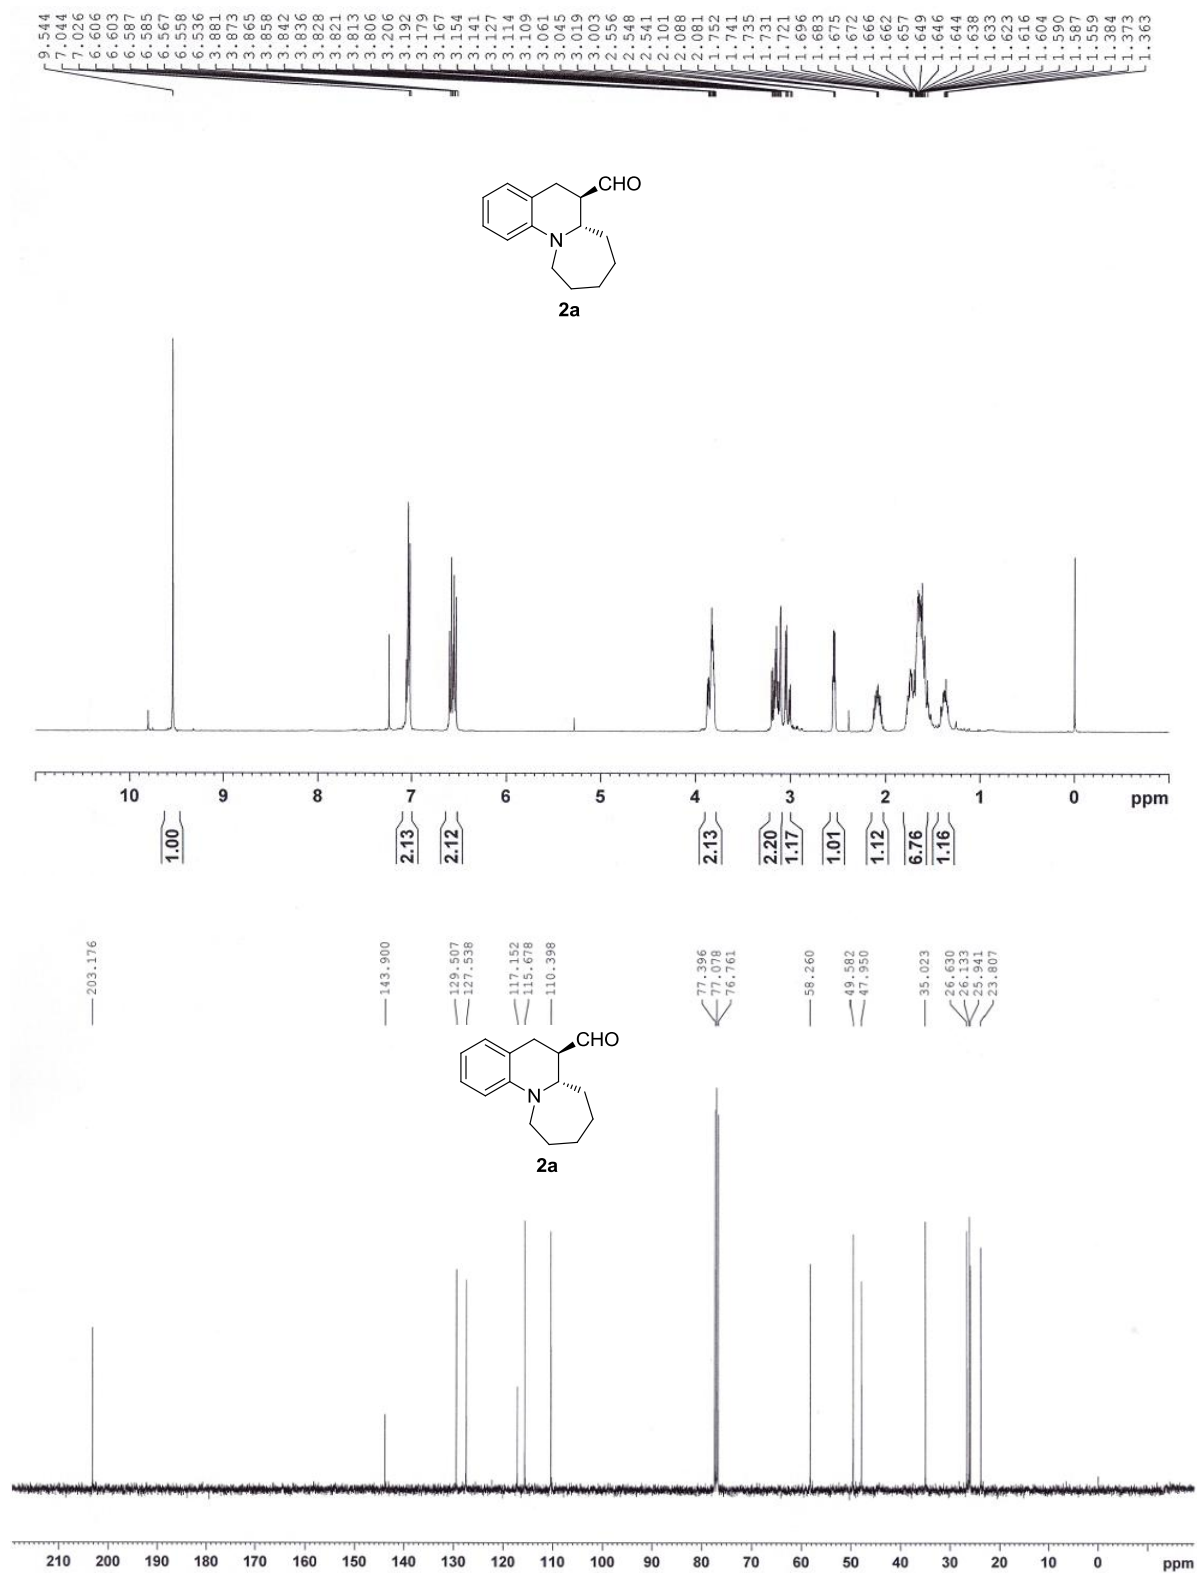



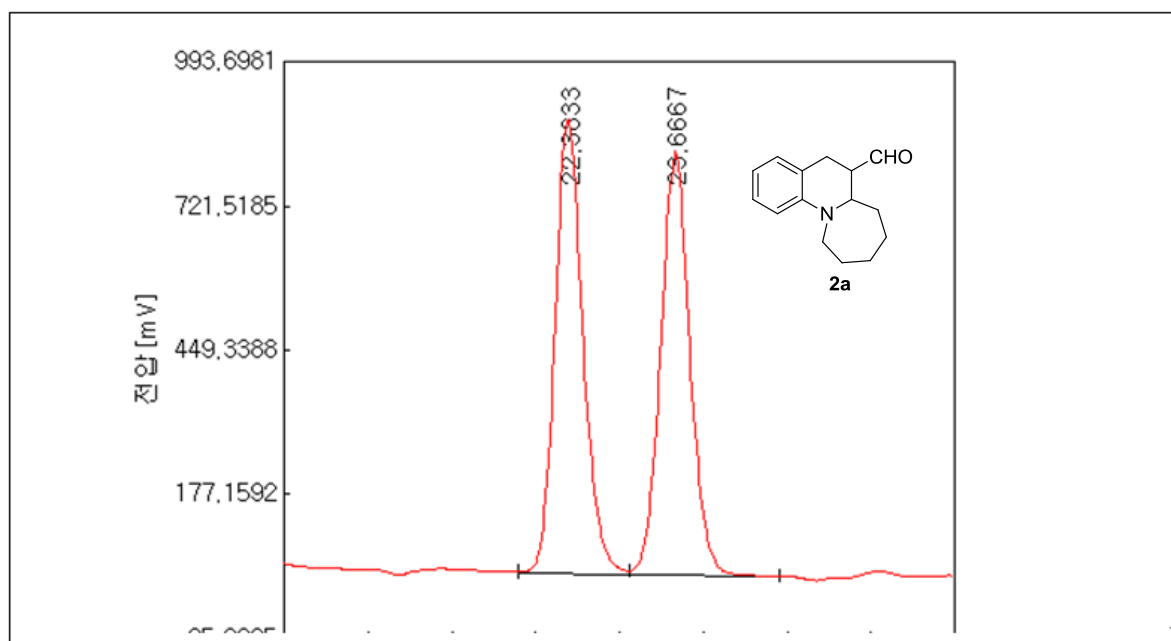

분석 결과

| 번호 | RT[분]   | 면적[mV*s]   | 형태 | 폭[초]     | 면적%     |
|----|---------|------------|----|----------|---------|
| 1  | 22.3833 | 20590.4352 | VV | 80.0000  | 50.5863 |
| 2  | 23.6667 | 20113.1251 | VV | 108.0000 | 49.4137 |

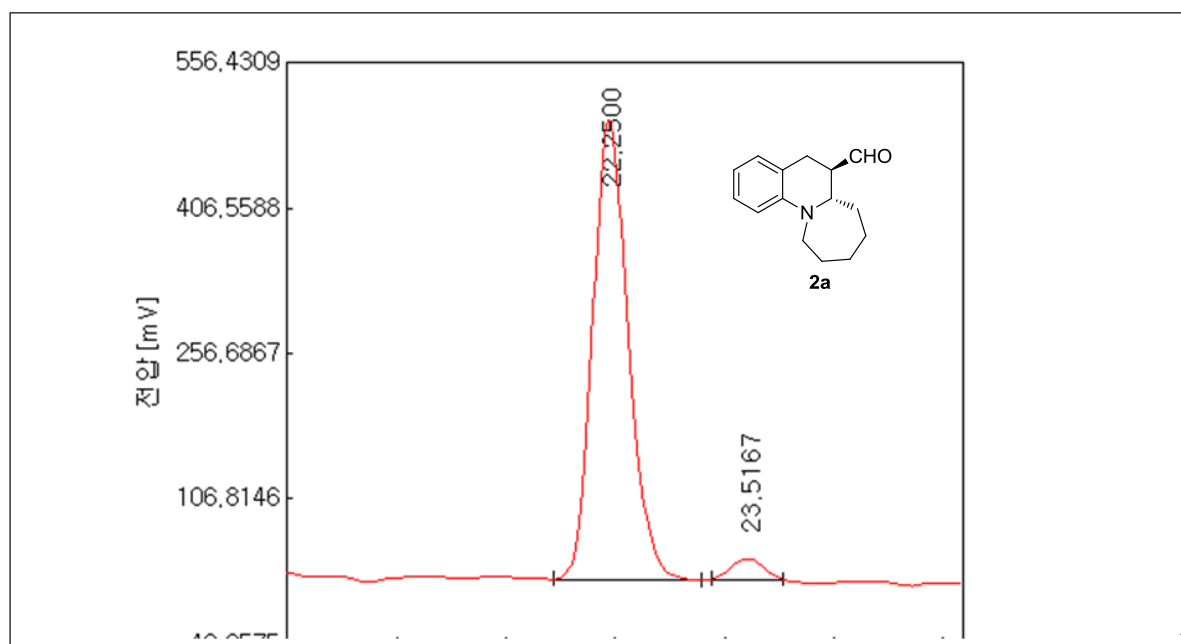

분석 결과

| 번호 | RT[분]   | 면적[mV*s]   | 형태 | 폭[초]    | 면적%     |
|----|---------|------------|----|---------|---------|
| 1  | 22.2500 | 11114.5708 | BB | 81.0000 | 96.1195 |
| 2  | 23.5167 | 448.7142   | FF | 39.0000 | 3.8805  |

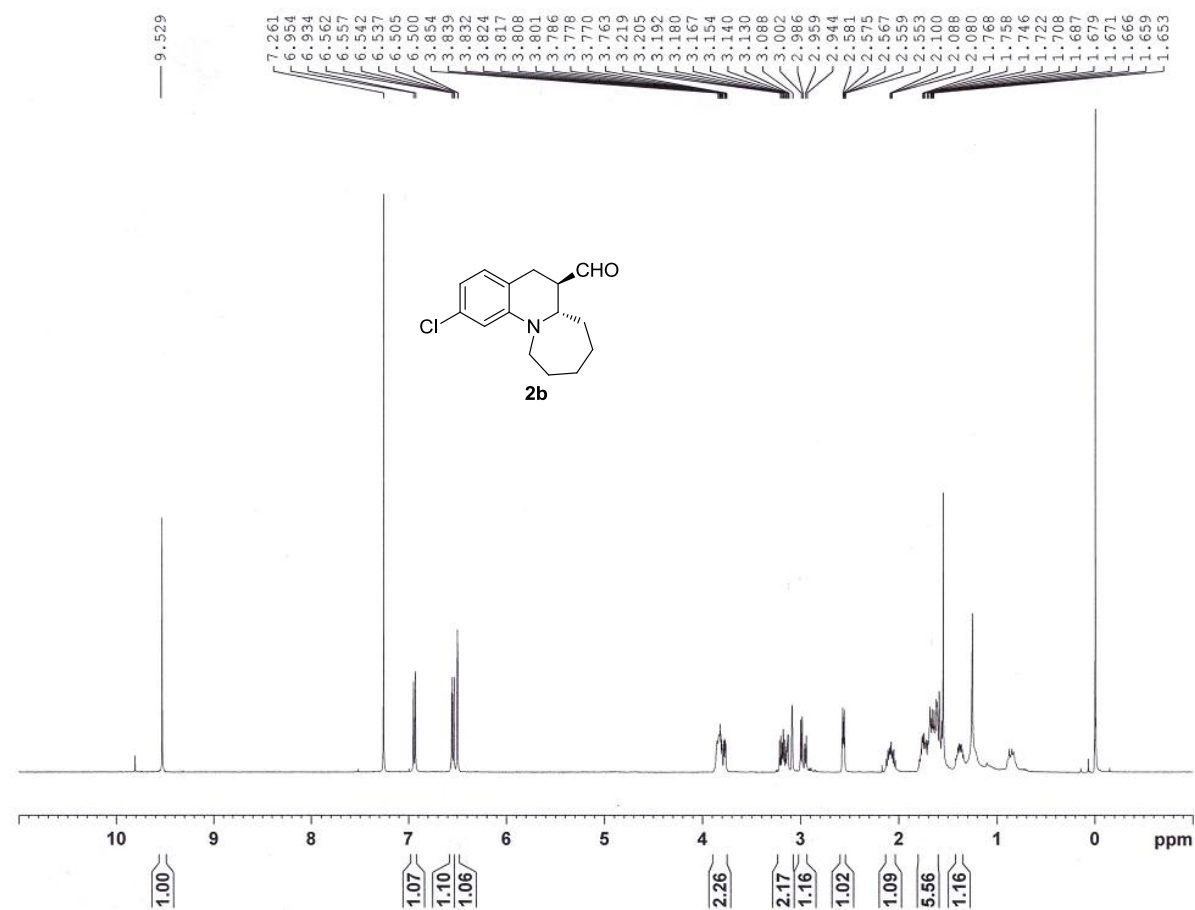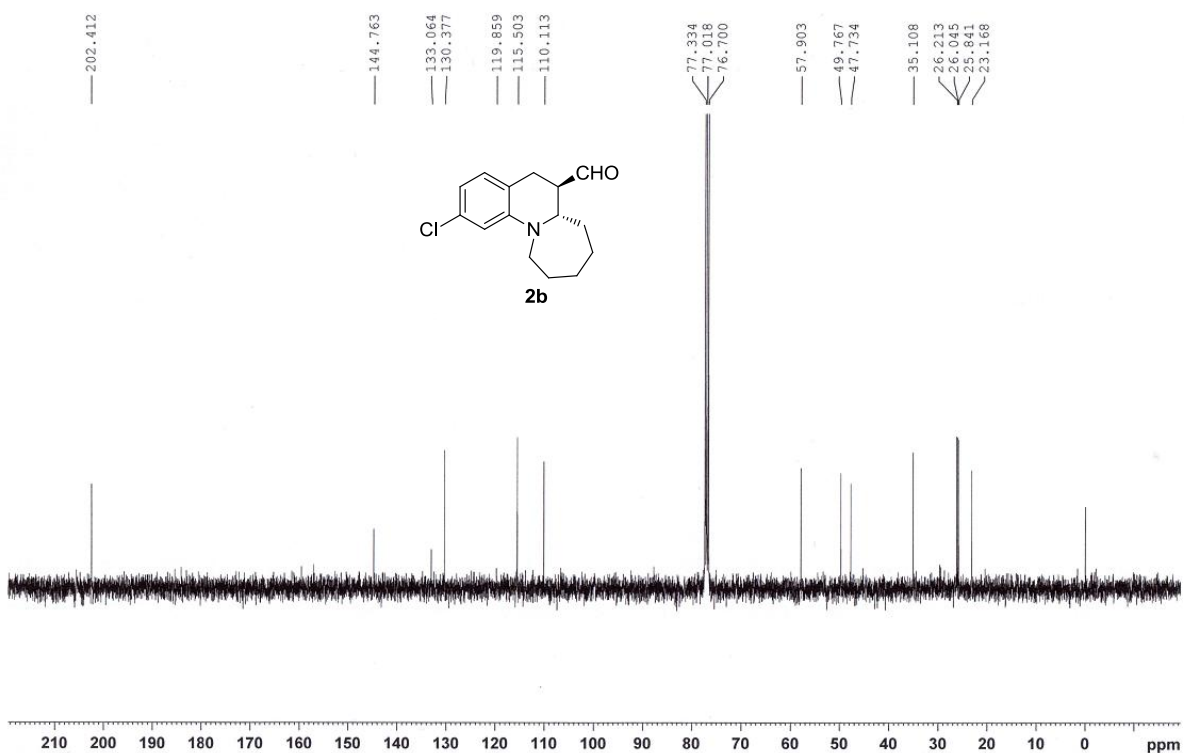

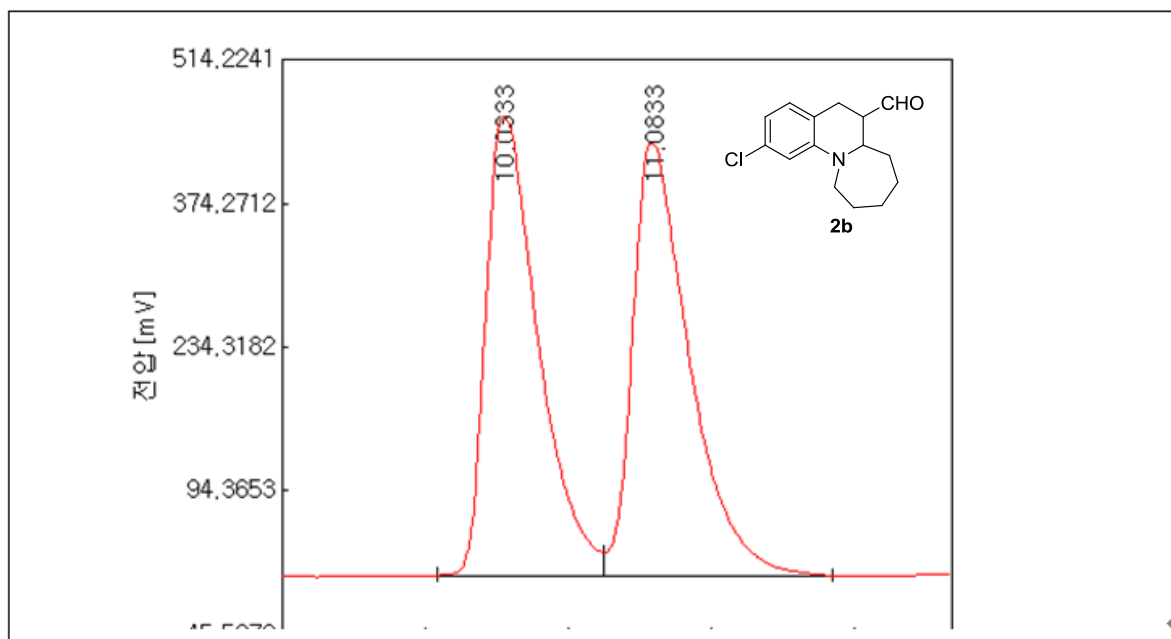

분석 결과

| 번호 | RT[분]   | 면적 [mV*s]  | 형태 | 폭[초]    | 면적%     |
|----|---------|------------|----|---------|---------|
| 1  | 10.0333 | 11828.1328 | BV | 70.0000 | 49.4871 |
| 2  | 11.0833 | 12073.3301 | VV | 96.0000 | 50.5129 |

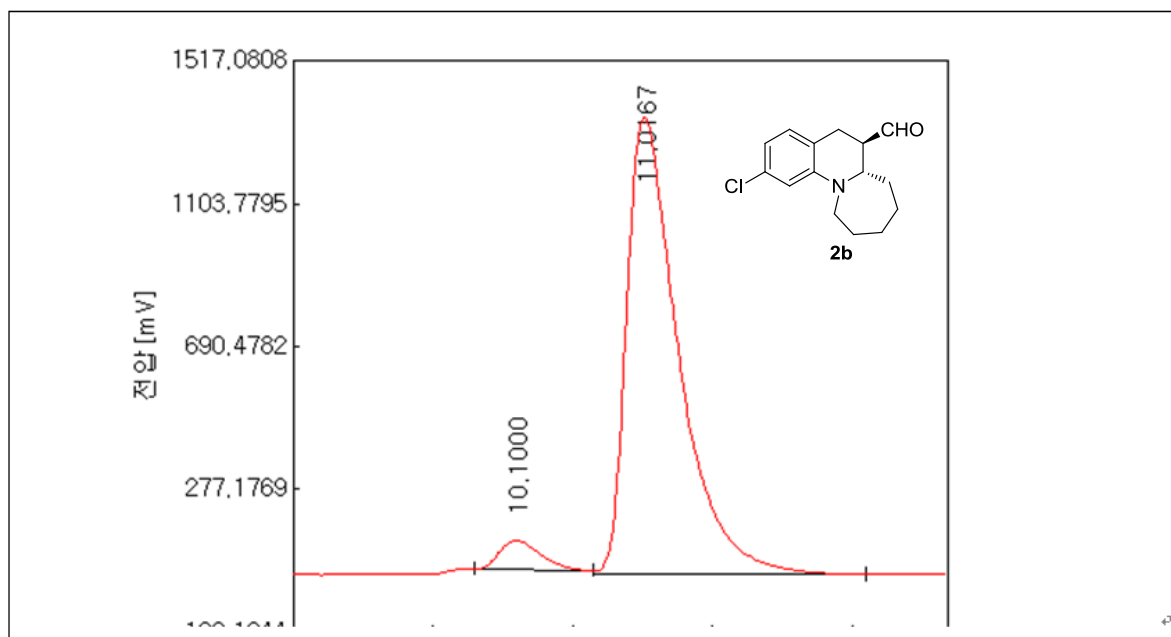

분석 결과

| 번호 | RT[분]   | 면적 [mV*s]  | 형태 | 폭[초]     | 면적%     |
|----|---------|------------|----|----------|---------|
| 1  | 10.1000 | 1799.5964  | FF | 51.0000  | 4.8361  |
| 2  | 11.0167 | 35411.9142 | BB | 117.0000 | 95.1639 |

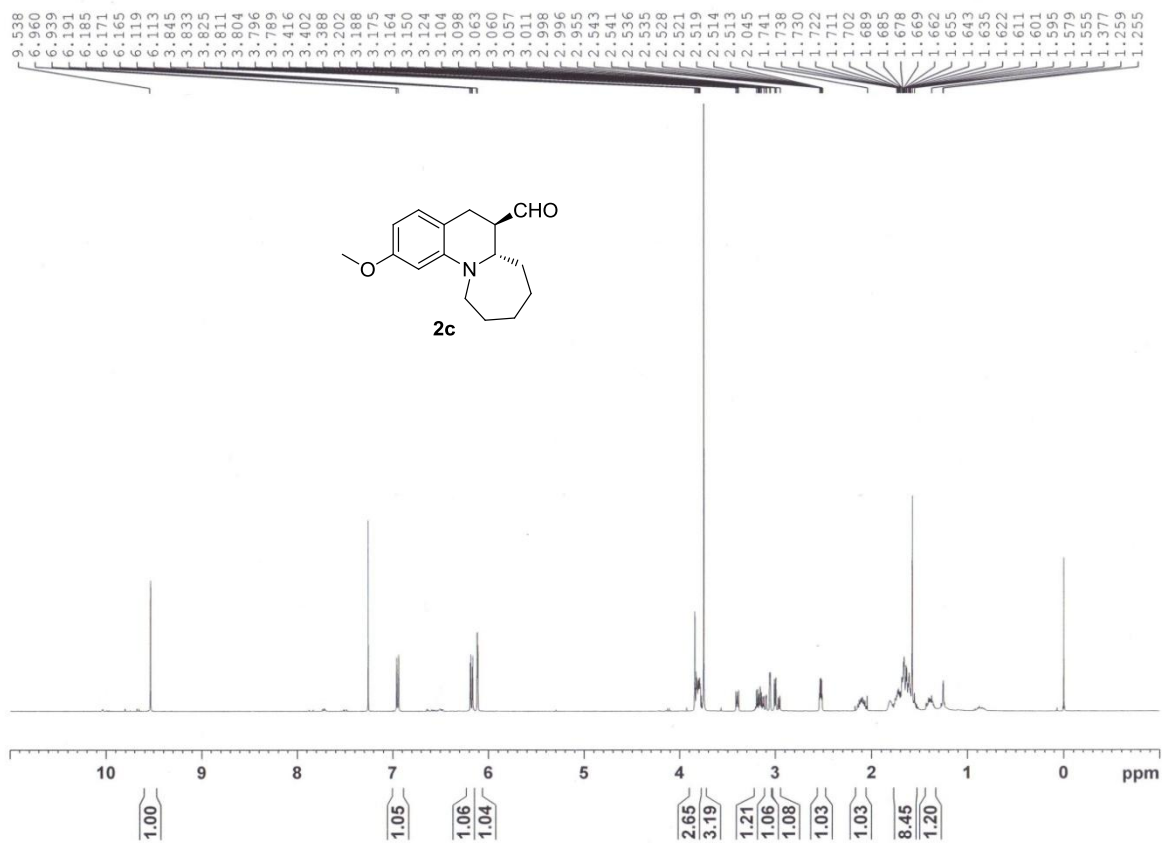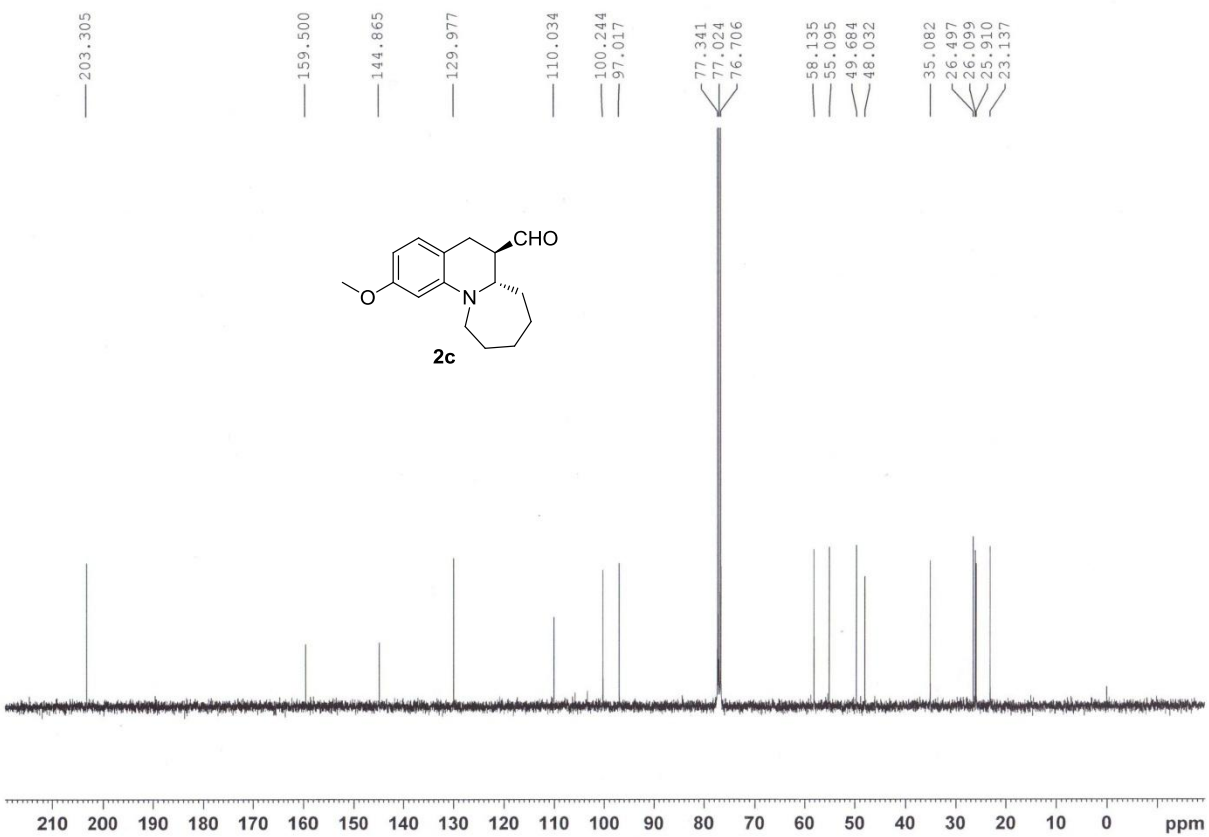

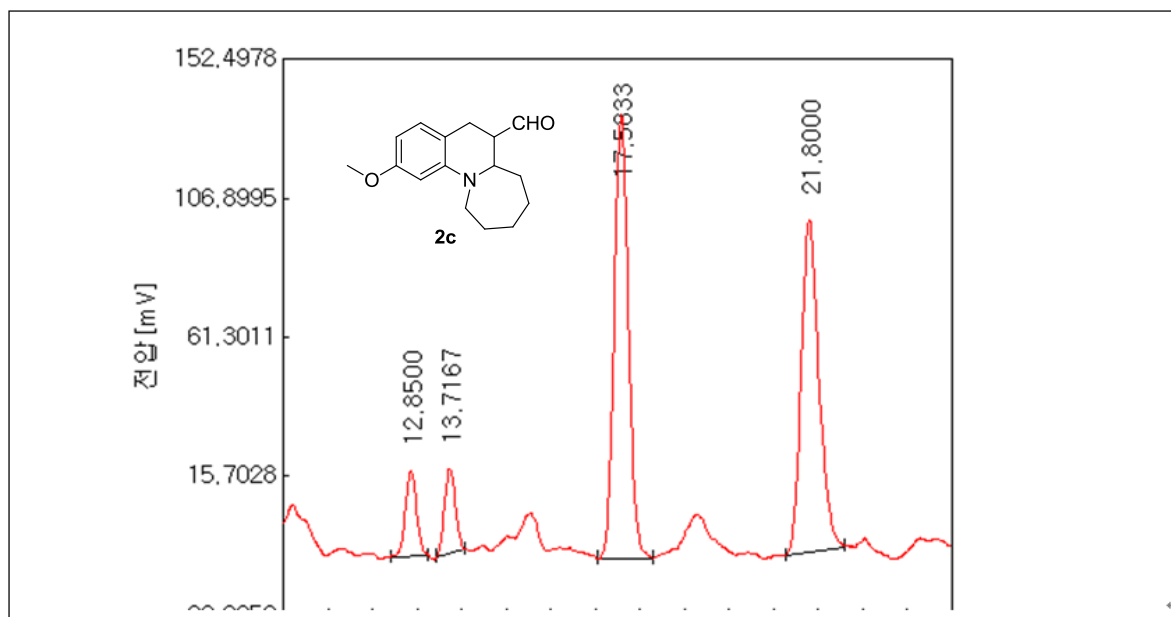

분석 결과

| 번호 | RT[분]   | 면적 [mV*s] | 형태 | 폭[초]    | 면적%     |
|----|---------|-----------|----|---------|---------|
| 1  | 12.8500 | 506.5475  | FF | 51.0000 | 6.7606  |
| 2  | 13.7167 | 489.8605  | FF | 38.0000 | 6.5379  |
| 3  | 17.5833 | 3350.4979 | BP | 74.0000 | 44.7169 |
| 4  | 21.8000 | 3145.7770 | BV | 79.0000 | 41.9847 |

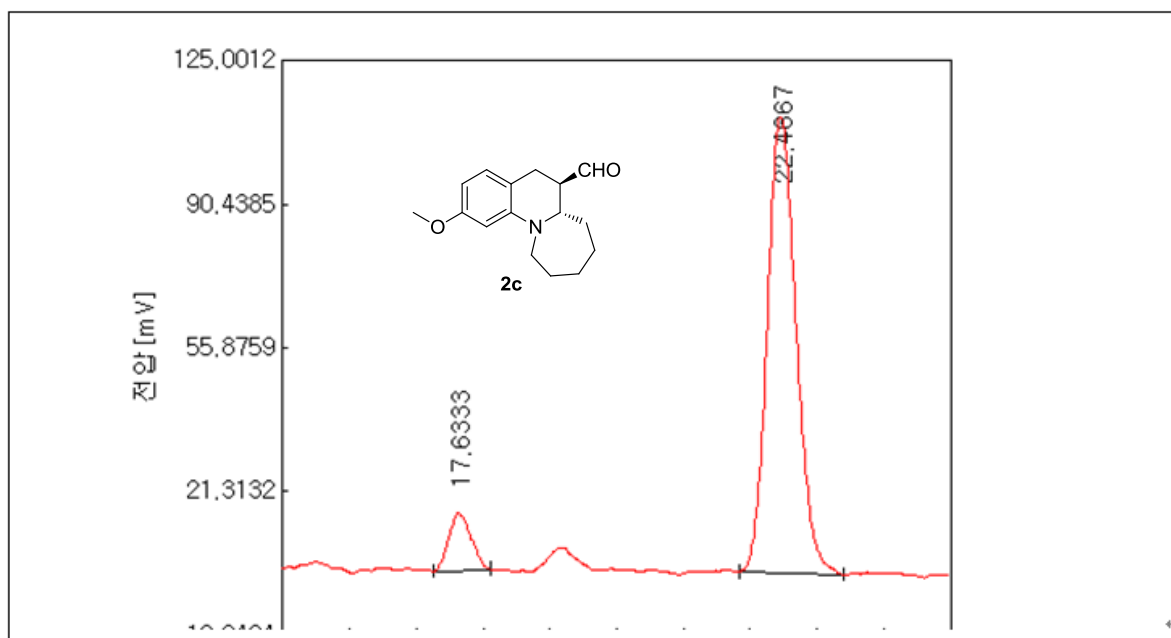

분석 결과

| 번호 | RT[분]   | 면적 [mV*s] | 형태 | 폭[초]    | 면적%     |
|----|---------|-----------|----|---------|---------|
| 1  | 17.6333 | 337.2080  | BV | 52.0000 | 8.9995  |
| 2  | 22.4667 | 3409.7427 | BB | 94.0000 | 91.0005 |

9.512  
9.511  
7.086  
7.066  
7.061  
7.043  
6.615  
6.612  
6.596  
6.594  
6.578  
6.575  
6.569  
6.549  
3.851  
3.842  
3.829  
3.821  
3.803  
3.792  
3.252  
3.243  
3.225  
3.216  
3.214  
3.205  
3.102  
3.096  
3.082  
3.067  
2.549  
2.543  
2.542  
2.536  
2.529  
2.527  
2.522  
1.710  
1.704  
1.690  
1.683  
1.668  
1.653  
1.650  
1.647  
1.640  
1.636  
1.629  
1.623  
1.618  
1.611  
1.594  
1.589  
1.584  
1.581  
1.575  
1.567  
1.552  
1.532  
1.492  
1.470  
1.465  
1.1  
1.1  
1.1

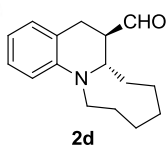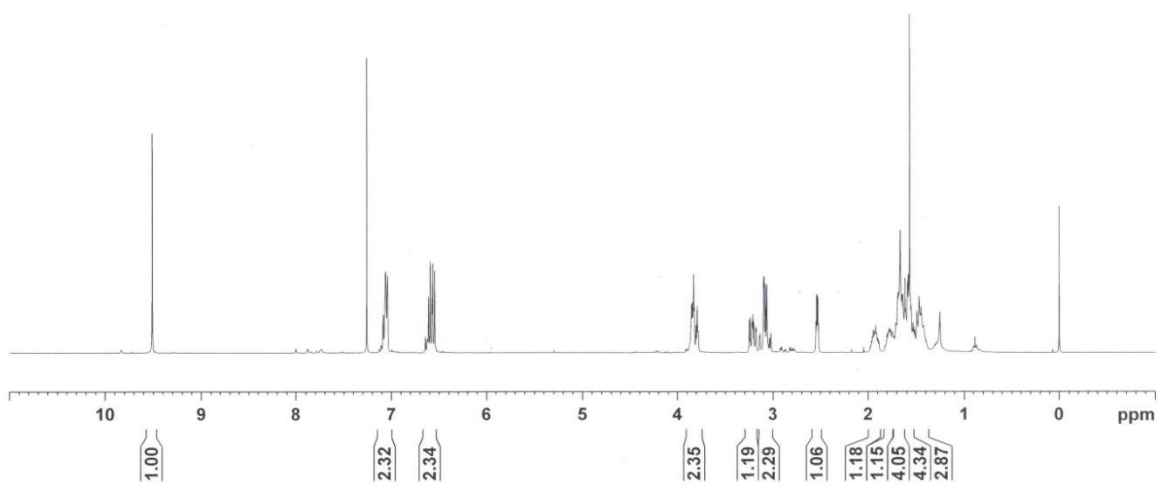

203.320

143.989

129.526

127.544

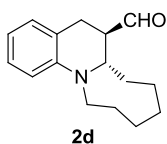

**2d**

77.346

77.028

76.711

58.456

53.150

48.658

33.906

27.825

26.916

26.266

26.097

24.177

210  
200  
190  
180  
170  
160  
150  
140  
130  
120  
110  
100  
90  
80  
70  
60  
50  
40  
30  
20  
10  
0  
ppm

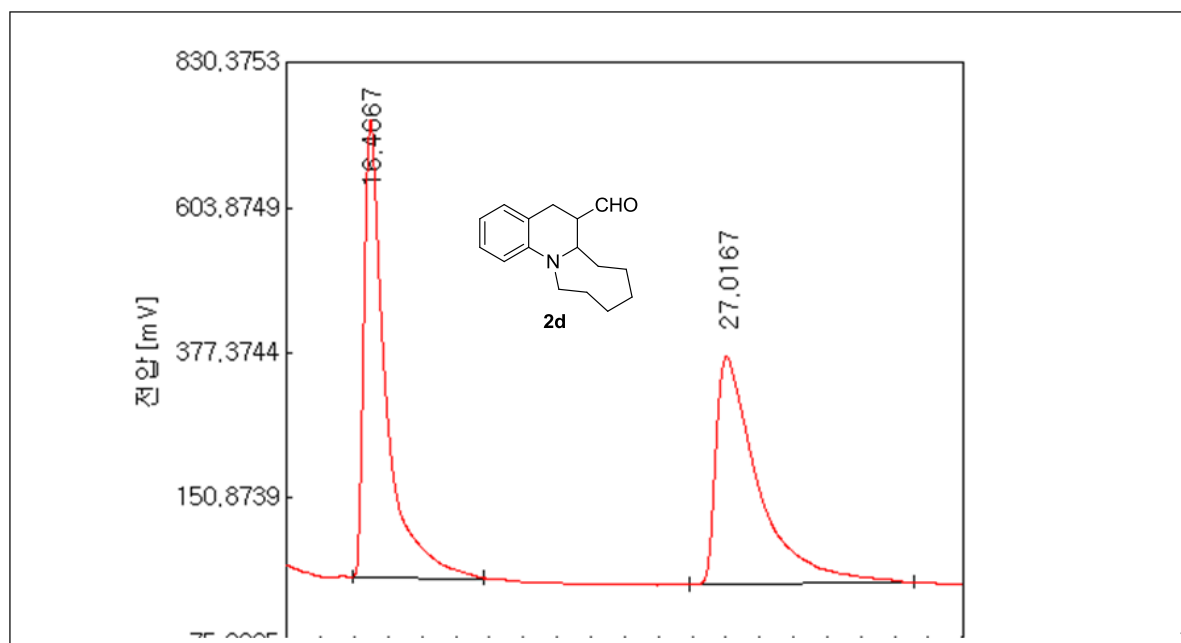

분석 결과

| 번호 | RT[분]   | 면적 [mV*s]  | 형태 | 폭[초]     | 면적%     |
|----|---------|------------|----|----------|---------|
| 1  | 16.4667 | 33022.6145 | BB | 234.0000 | 50.5595 |
| 2  | 27.0167 | 32291.6838 | FF | 397.0000 | 49.4405 |

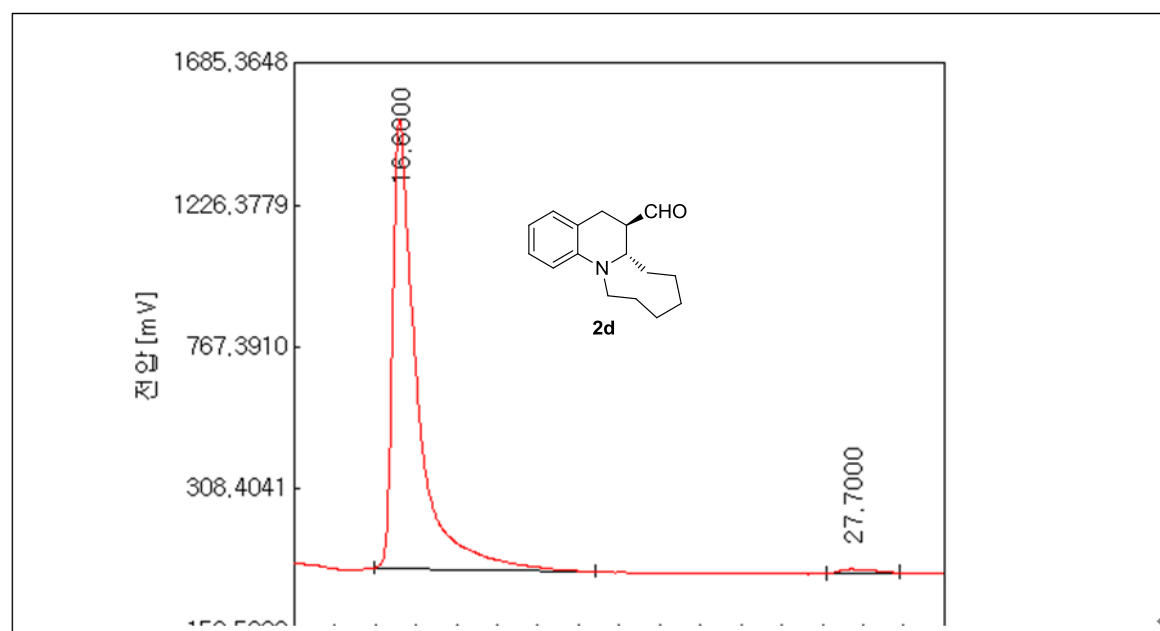

분석 결과

| 번호 | RT[분]   | 면적 [mV*s]  | 형태 | 폭[초]     | 면적%     |
|----|---------|------------|----|----------|---------|
| 1  | 16.6000 | 62643.3399 | FF | 327.0000 | 98.6958 |
| 2  | 27.7000 | 827.7694   | FF | 108.0000 | 1.3042  |

9.479  
7.148  
7.145  
7.142  
7.130  
7.108  
6.420  
6.399  
3.853  
3.845  
3.835  
3.823  
3.761  
3.734  
3.723  
3.258  
3.230  
3.212  
3.204  
3.192  
3.174  
3.166  
3.104  
3.067  
3.064  
3.062  
3.039  
3.014  
2.972  
2.543  
2.537  
2.529  
2.522  
2.515  
1.883  
1.878  
1.764  
1.684  
1.678  
1.660  
1.640  
1.623  
1.617  
1.610  
1.602  
1.596  
1.590  
1.574  
1.567  
1.557  
1.549  
1.542  
1.540  
1.533  
1.497  
1.482  
1.477  
1.456  
1.434  
1.424  
1.413  
1.407  
1.394  
1.387  
1.381

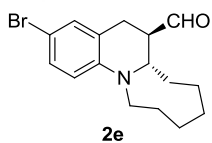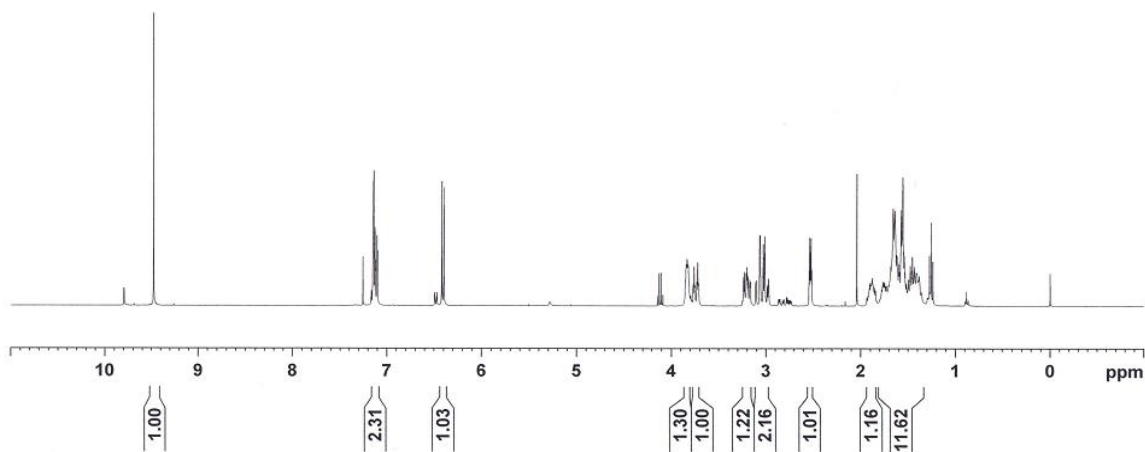

202.445

142.888  
131.842  
130.168  
119.578  
112.904  
107.207

77.412  
77.074  
76.776

58.352  
53.215  
48.470

33.828  
27.790  
26.551  
26.082  
25.934  
23.754

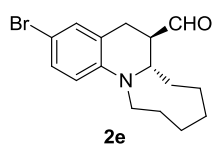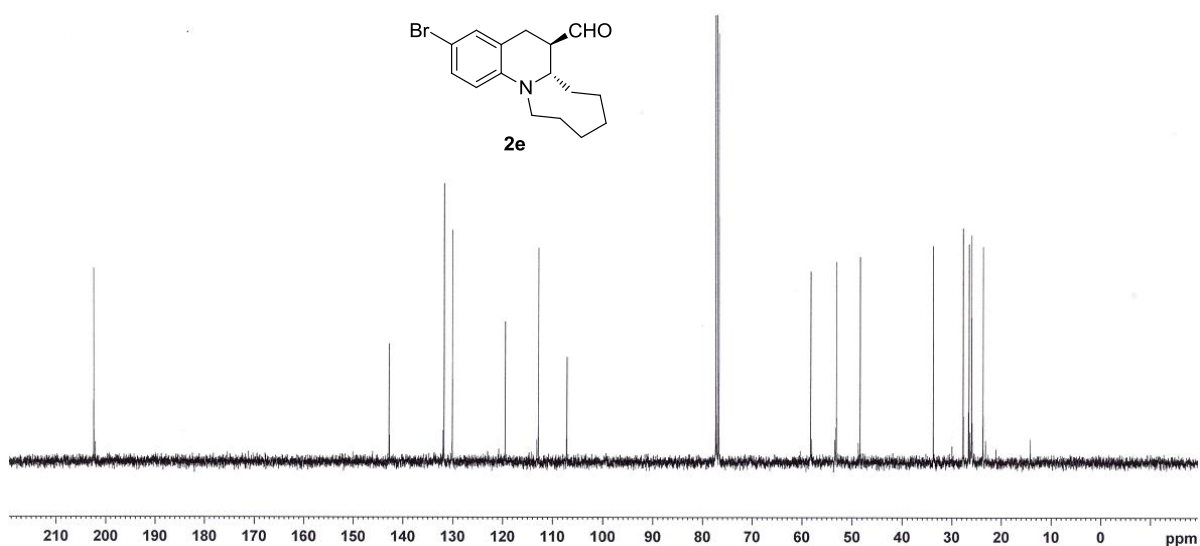



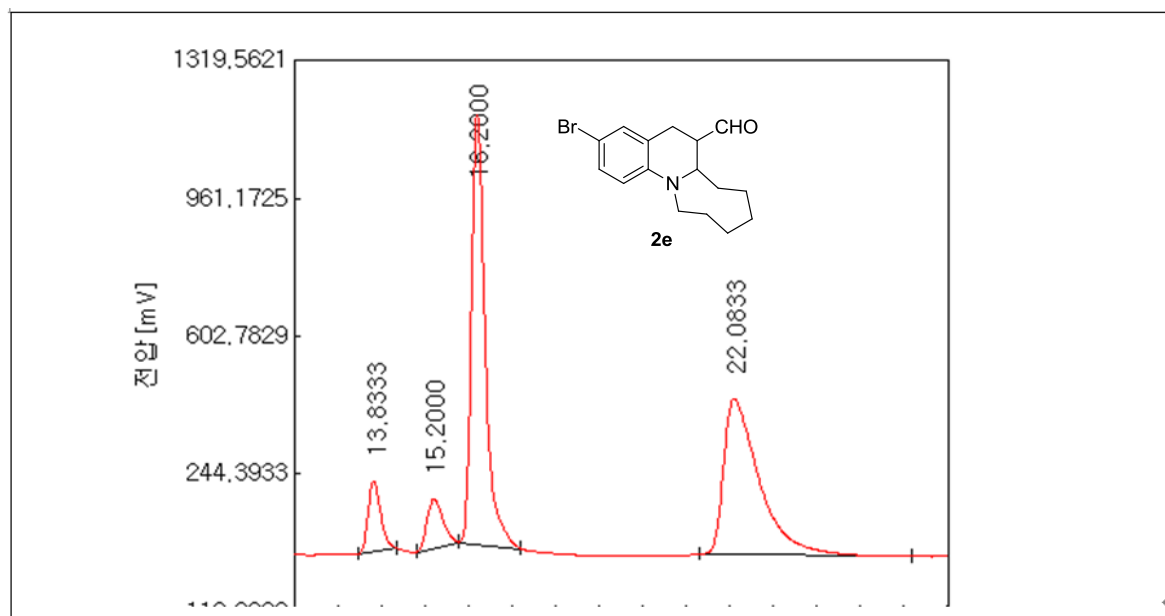

분석 결과

| 번호 | RT[분]   | 면적 [mV*s]  | 형태 | 폭[초]     | 면적%     |
|----|---------|------------|----|----------|---------|
| 1  | 13.8333 | 3805.0891  | BB | 53.0000  | 6.7856  |
| 2  | 15.2000 | 3325.1969  | BB | 58.0000  | 5.9123  |
| 3  | 16.2000 | 25229.7620 | BB | 85.0000  | 44.8595 |
| 4  | 22.0833 | 23881.7241 | FF | 292.0000 | 42.4626 |

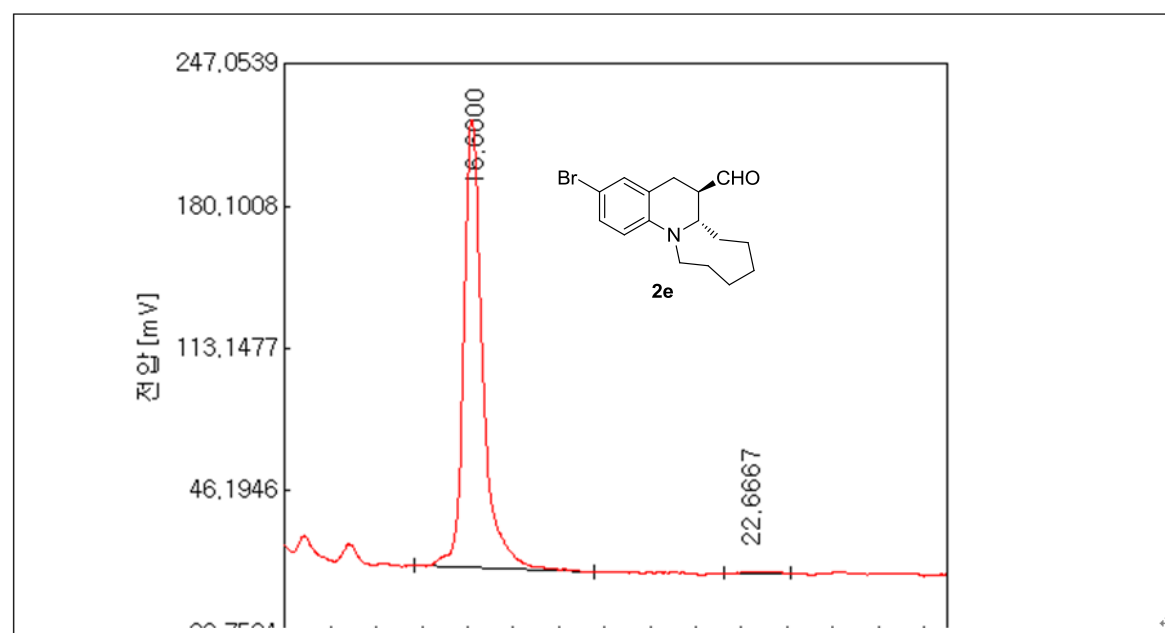

분석 결과

| 번호 | RT[분]   | 면적 [mV*s] | 형태 | 폭[초]     | 면적%     |
|----|---------|-----------|----|----------|---------|
| 1  | 16.6000 | 6389.8638 | FF | 237.0000 | 99.4916 |
| 2  | 22.6667 | 32.6539   | FF | 87.0000  | 0.5084  |

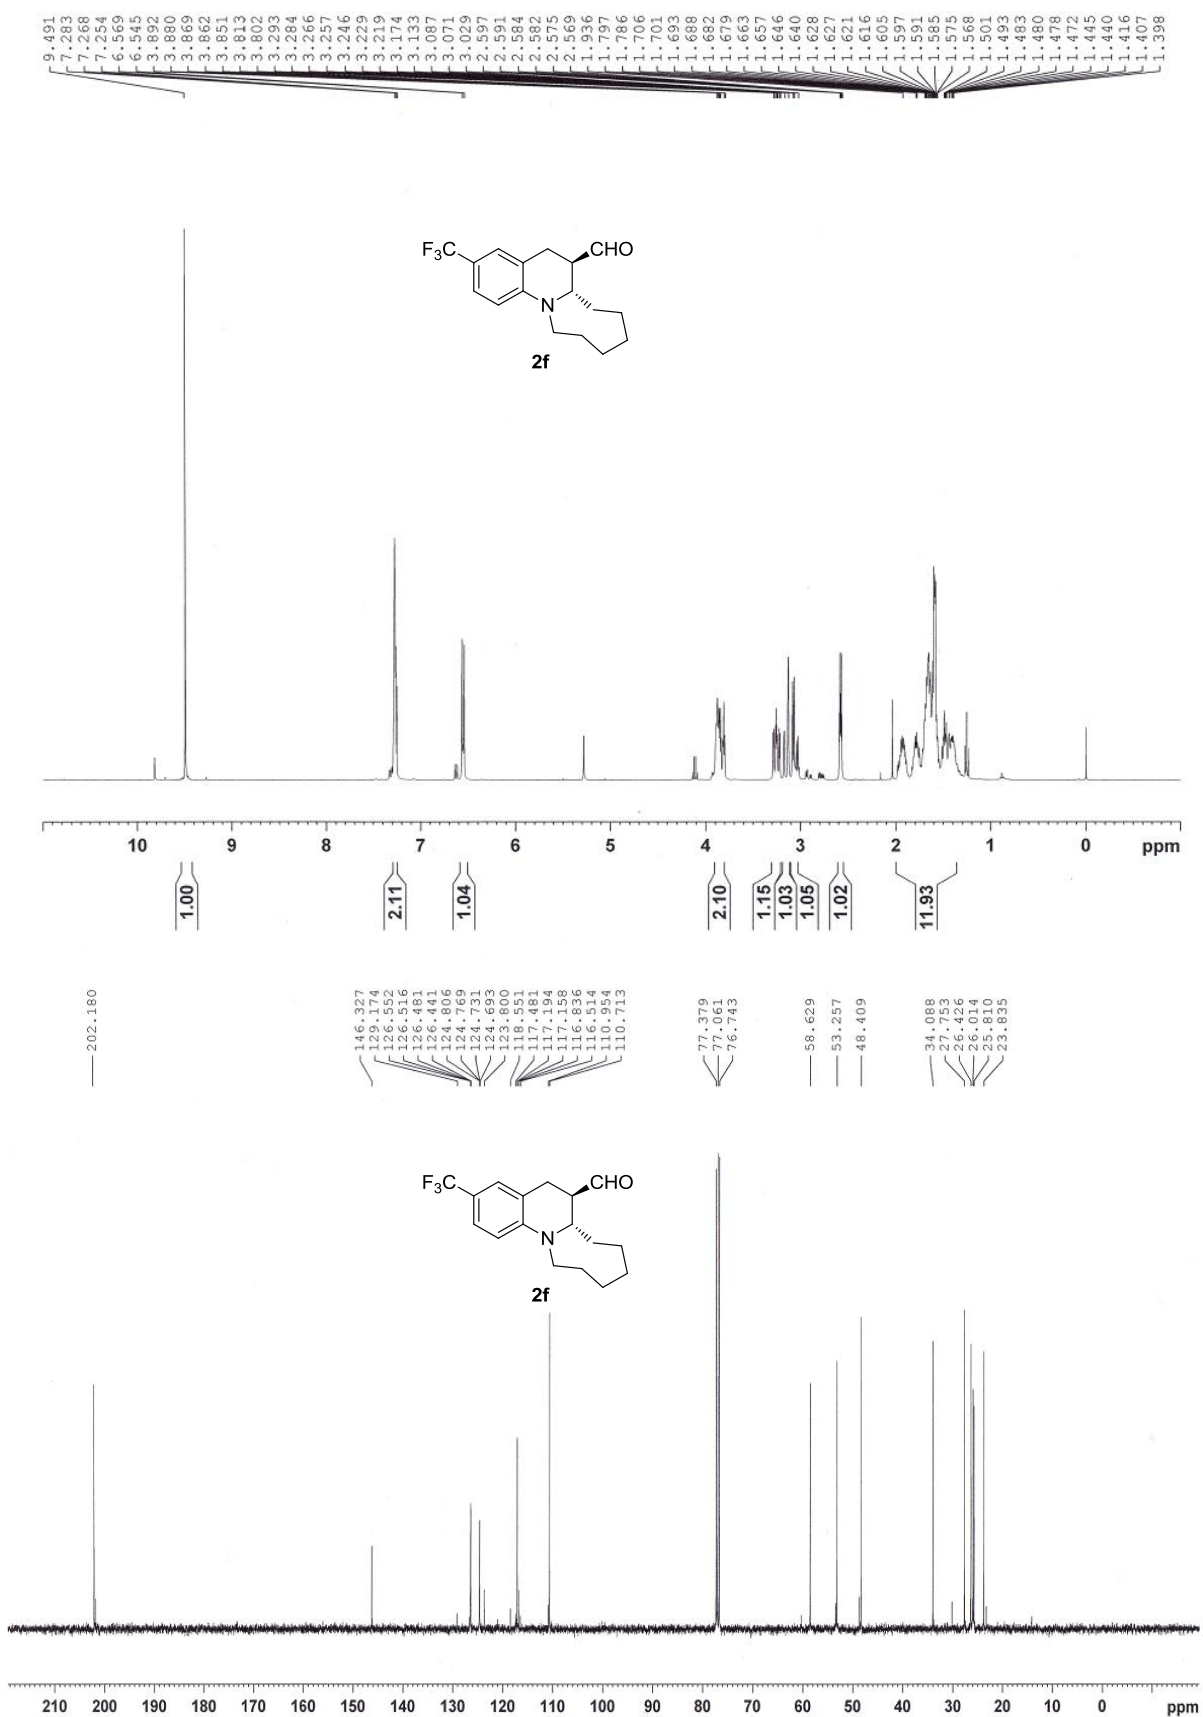

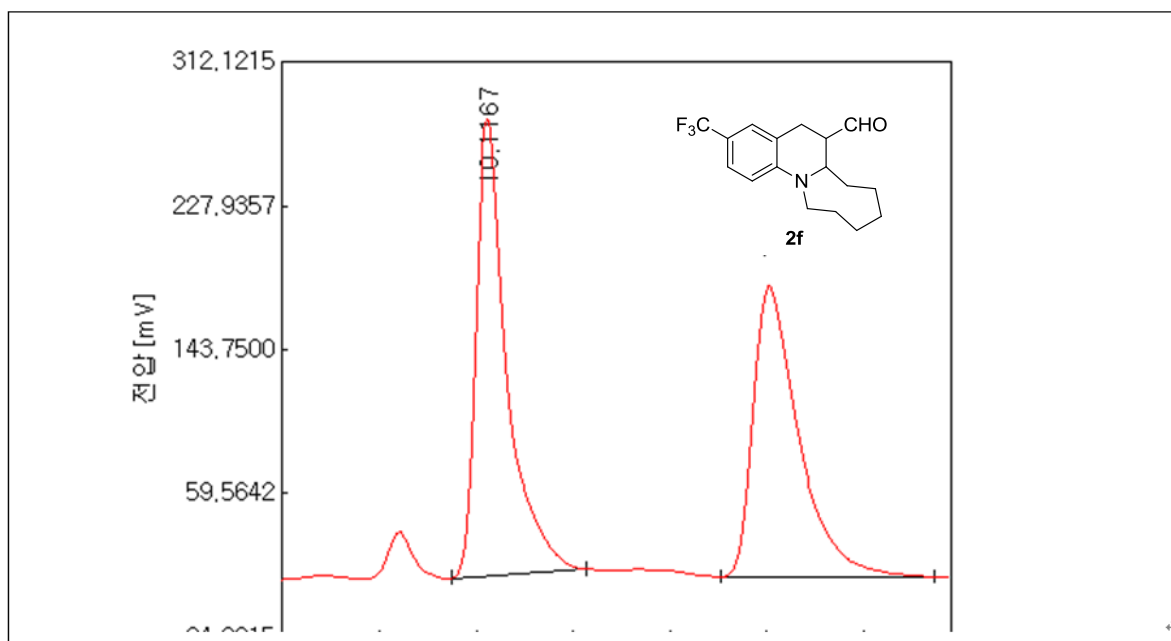

분석 결과

| 번호 | RT[분]   | 면적 [mV*s] | 형태 | 폭 [초]    | 면적%     |
|----|---------|-----------|----|----------|---------|
| 1  | 10.1167 | 6125.9363 | BB | 83.0000  | 51.4649 |
| 2  | 13.0167 | 5777.2055 | FF | 133.0000 | 48.5351 |

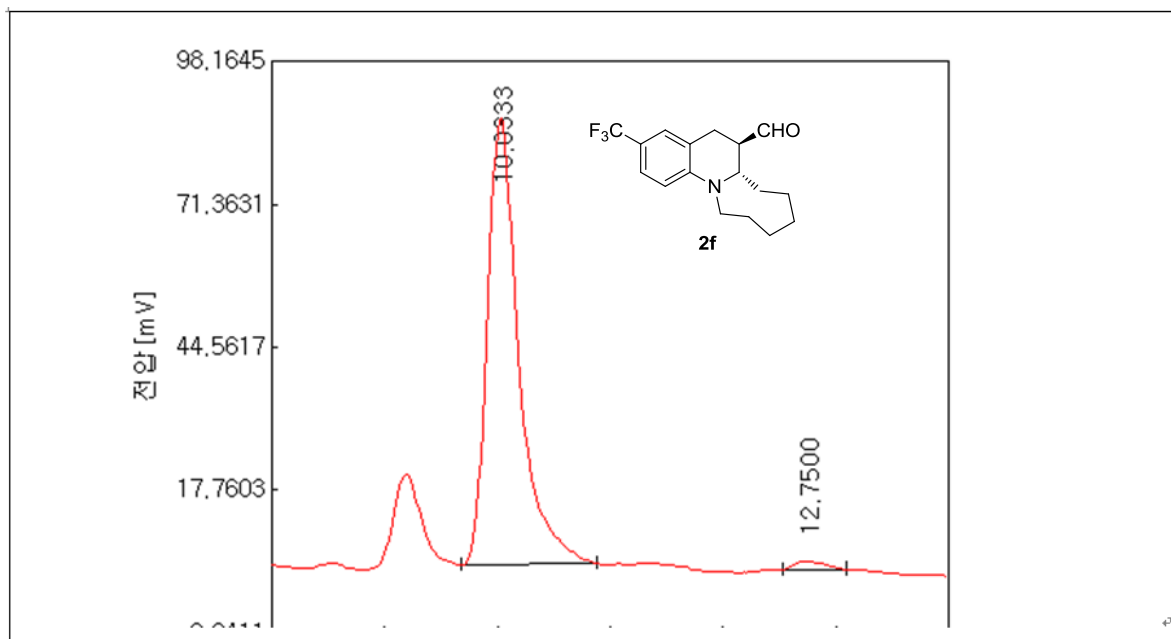

분석 결과

| 번호 | RT[분]   | 면적 [mV*s] | 형태 | 폭 [초]   | 면적%     |
|----|---------|-----------|----|---------|---------|
| 1  | 10.0333 | 1688.9008 | BB | 72.0000 | 98.2012 |
| 2  | 12.7500 | 30.9373   | FF | 34.0000 | 1.7988  |

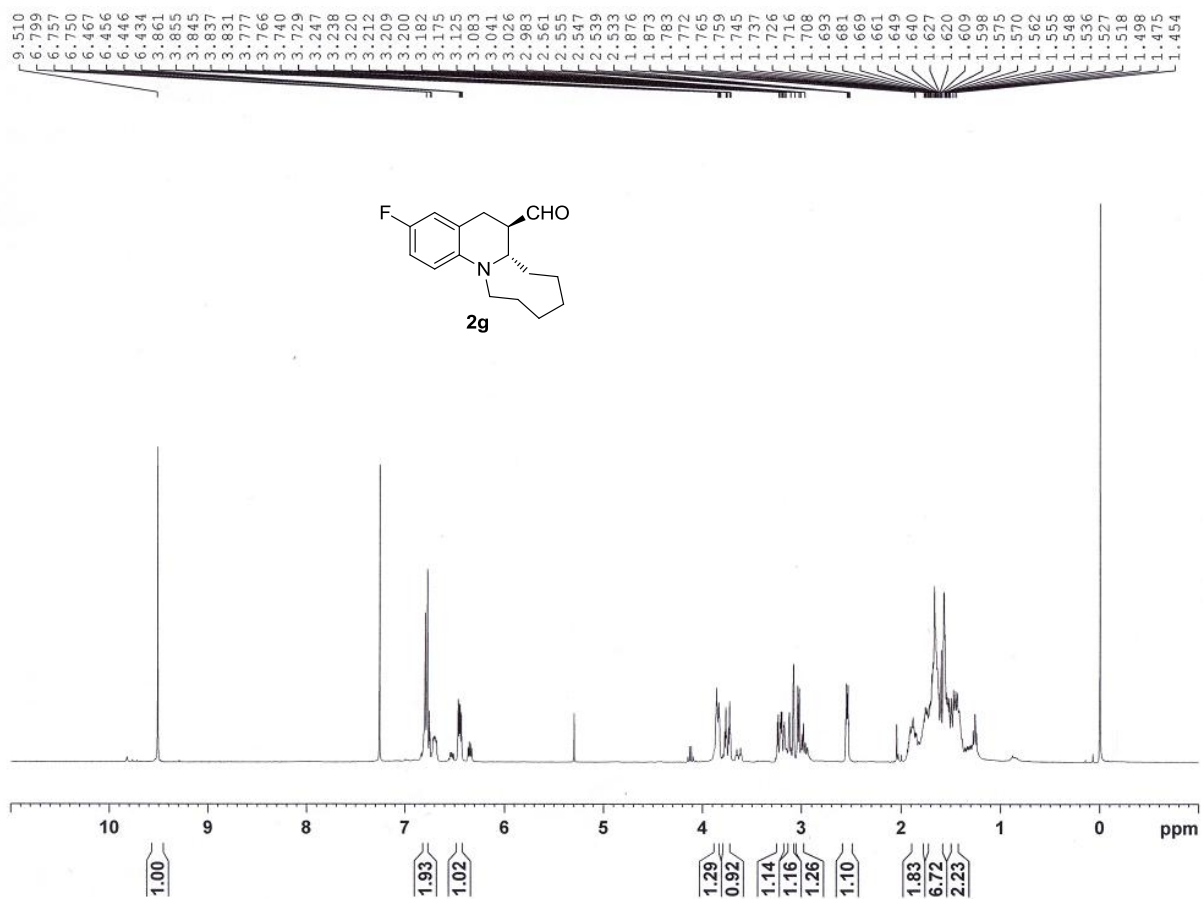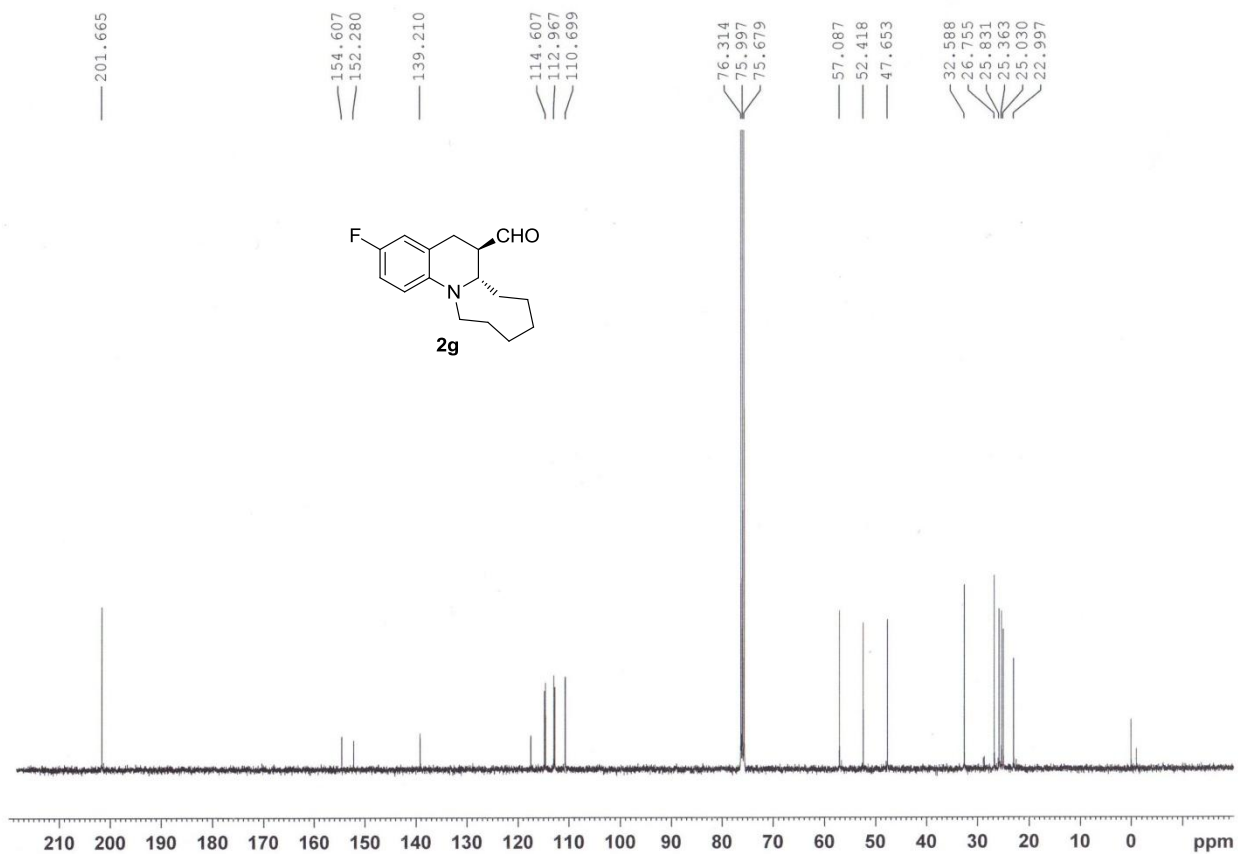

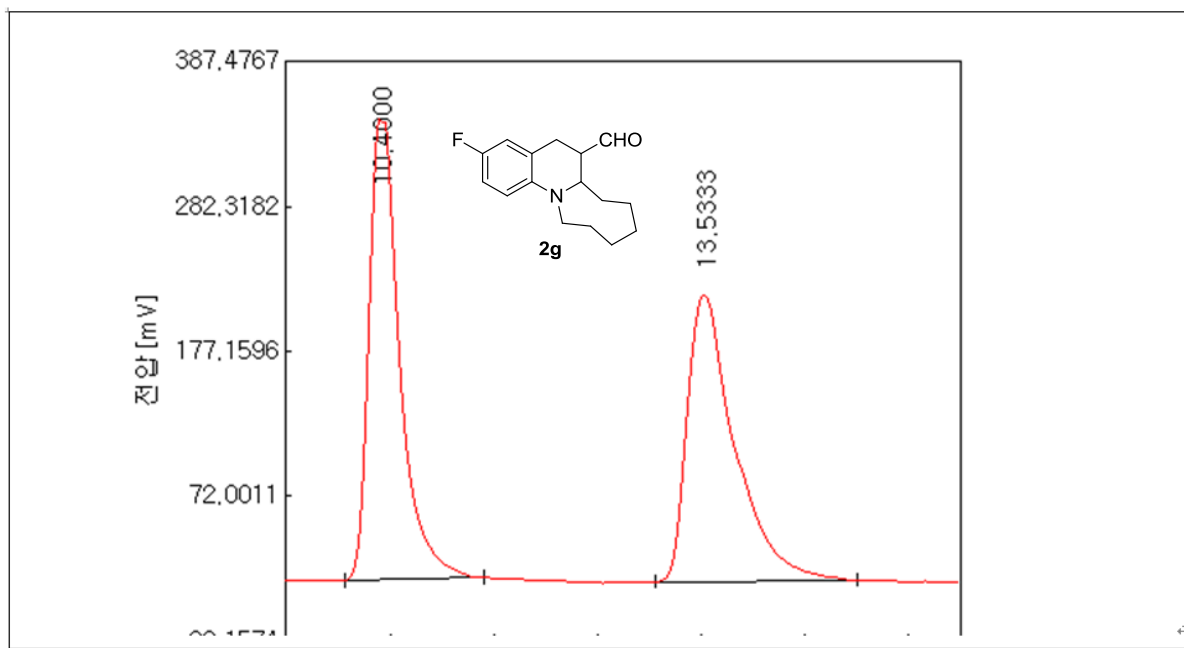

분석 결과

| 번호 | RT[분]   | 면적 [mV*s] | 형태 | 폭[초]     | 면적%     |
|----|---------|-----------|----|----------|---------|
| 1  | 10.4000 | 6958.4383 | BB | 80.0000  | 50.2231 |
| 2  | 13.5333 | 6896.6210 | BB | 117.0000 | 49.7769 |

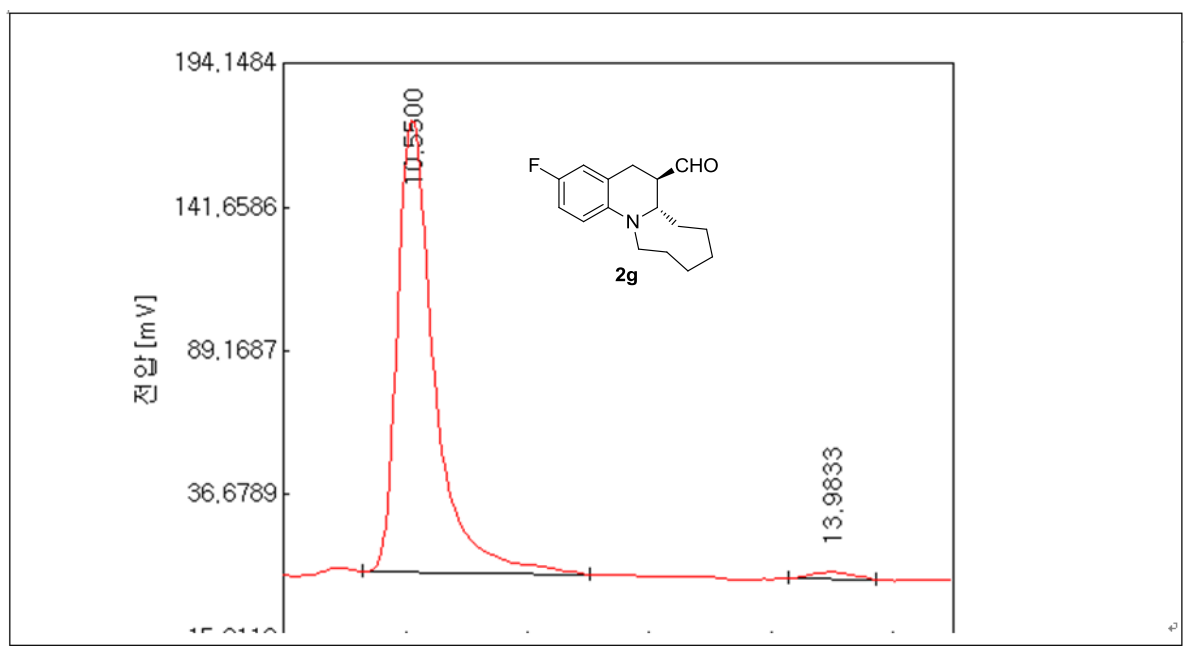

분석 결과

| 번호 | RT[분]   | 면적 [mV*s] | 형태 | 폭[초]     | 면적%     |
|----|---------|-----------|----|----------|---------|
| 1  | 10.5500 | 3615.2193 | FF | 112.0000 | 98.2663 |
| 2  | 13.9833 | 63.7819   | FF | 43.0000  | 1.7337  |

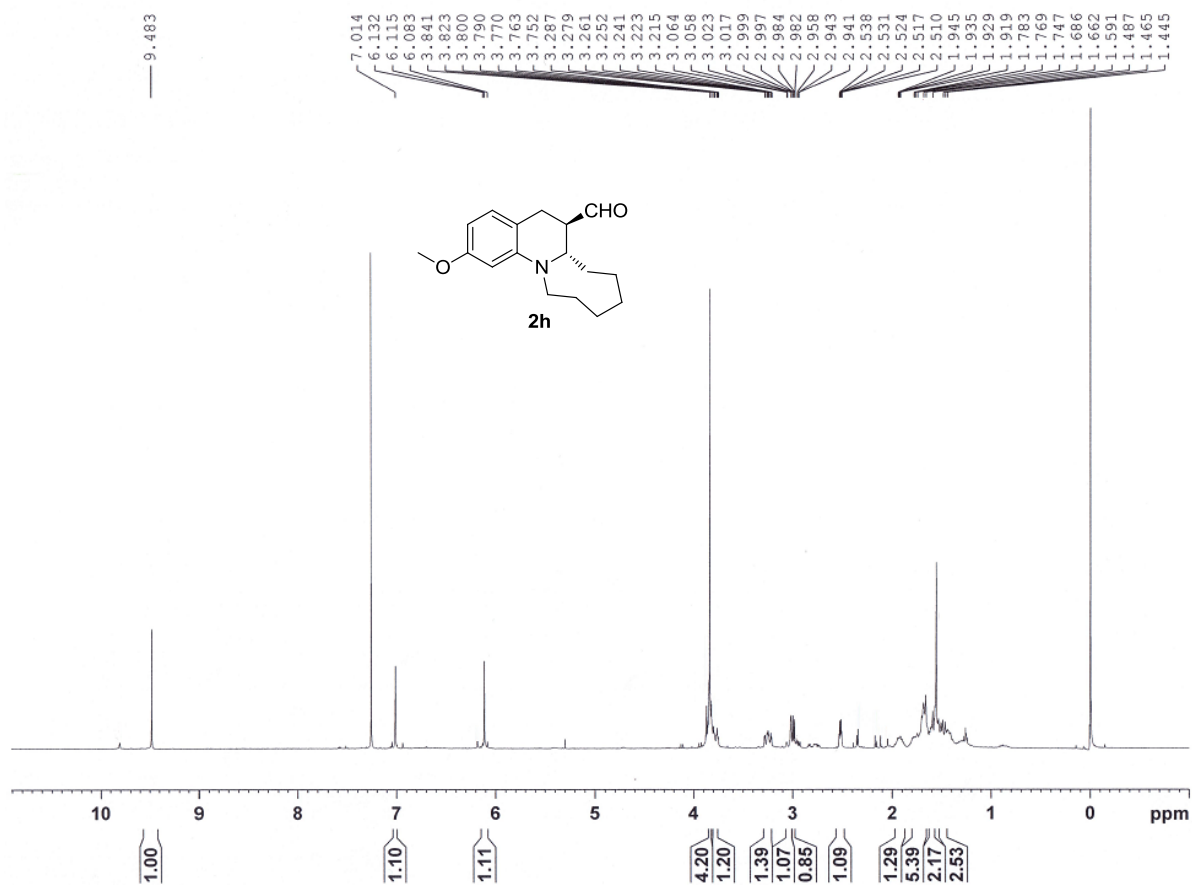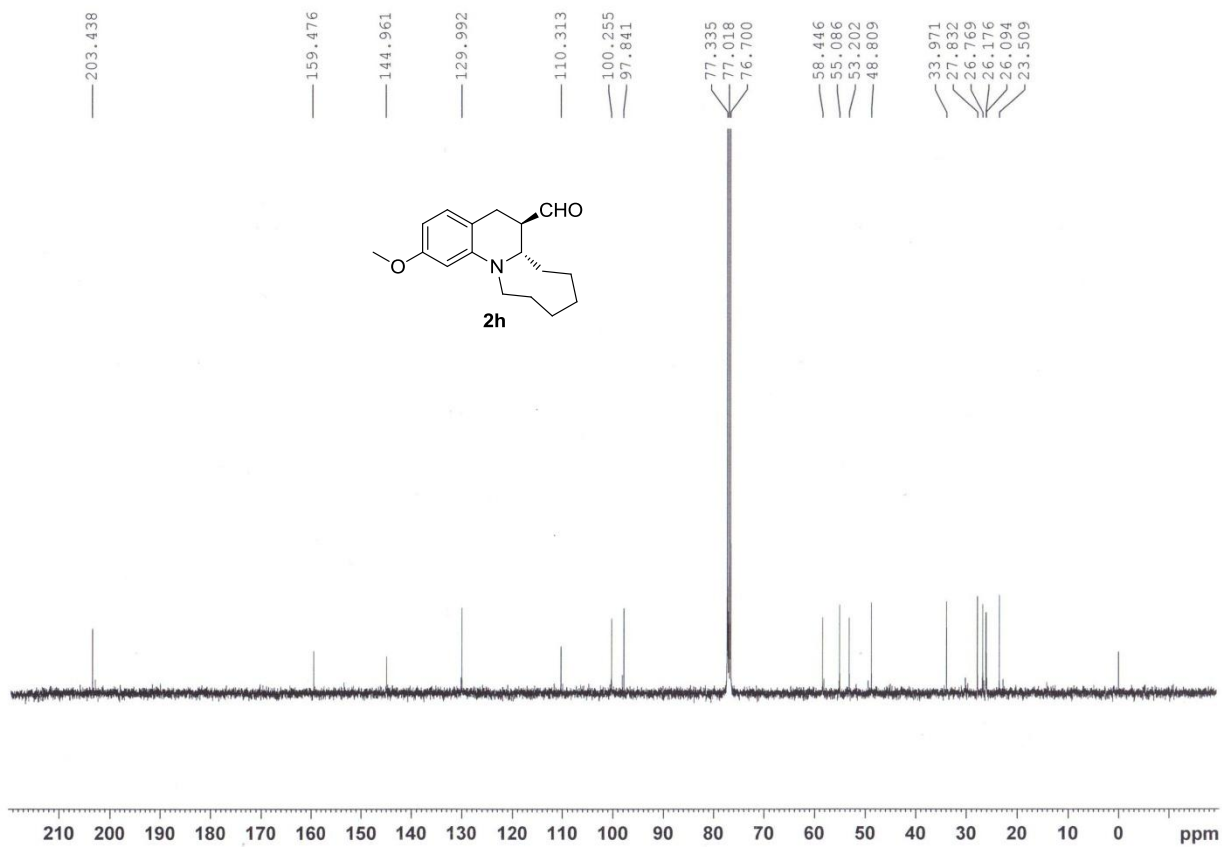

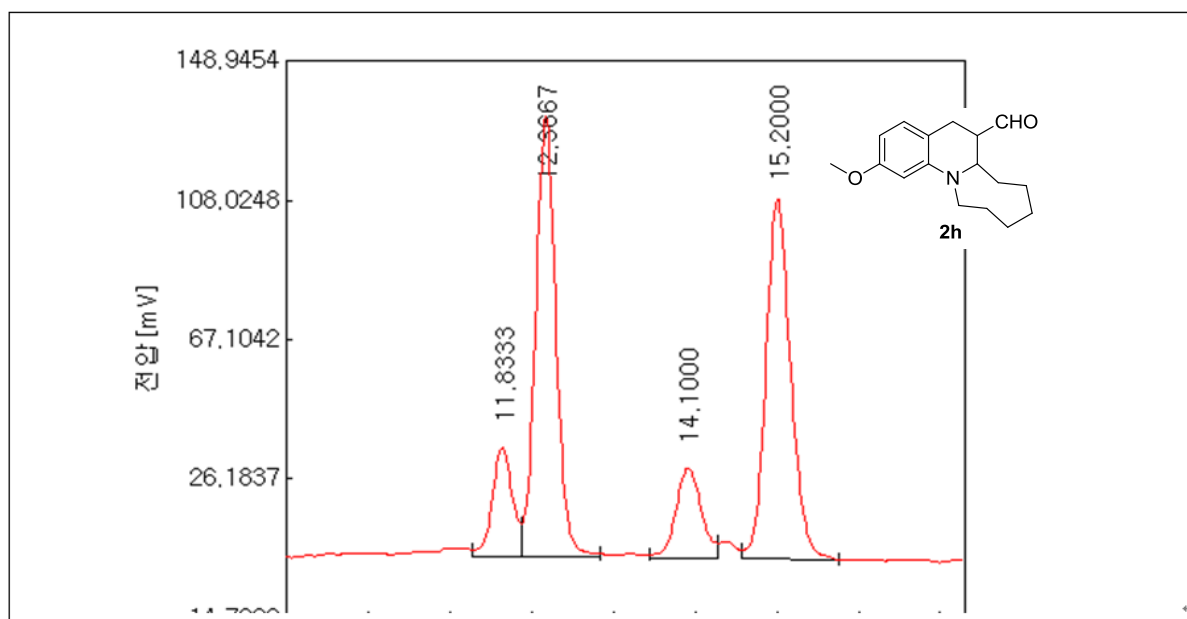

분석 결과

| 번호 | RT[분]   | 면적 [mV*s] | 형태 | 폭[초]    | 면적%     |
|----|---------|-----------|----|---------|---------|
| 1  | 11.8333 | 565.0889  | BB | 36.0000 | 9.7173  |
| 2  | 12.3667 | 2358.0405 | BB | 58.0000 | 40.5490 |
| 3  | 14.1000 | 593.8637  | BV | 51.0000 | 10.2121 |
| 4  | 15.2000 | 2298.2975 | BB | 71.0000 | 39.5216 |

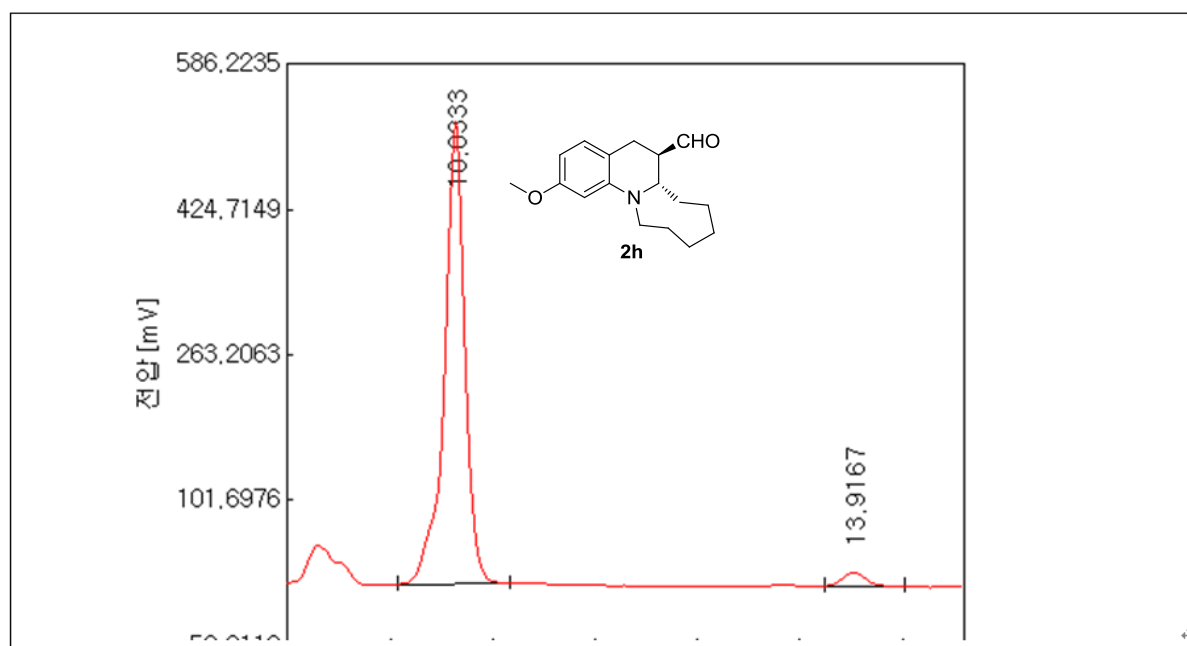

분석 결과

| 번호 | RT[분]   | 면적 [mV*s] | 형태 | 폭[초]    | 면적%     |
|----|---------|-----------|----|---------|---------|
| 1  | 10.0333 | 7366.8692 | BB | 66.0000 | 96.7923 |
| 2  | 13.9167 | 244.1411  | FF | 47.0000 | 3.2077  |

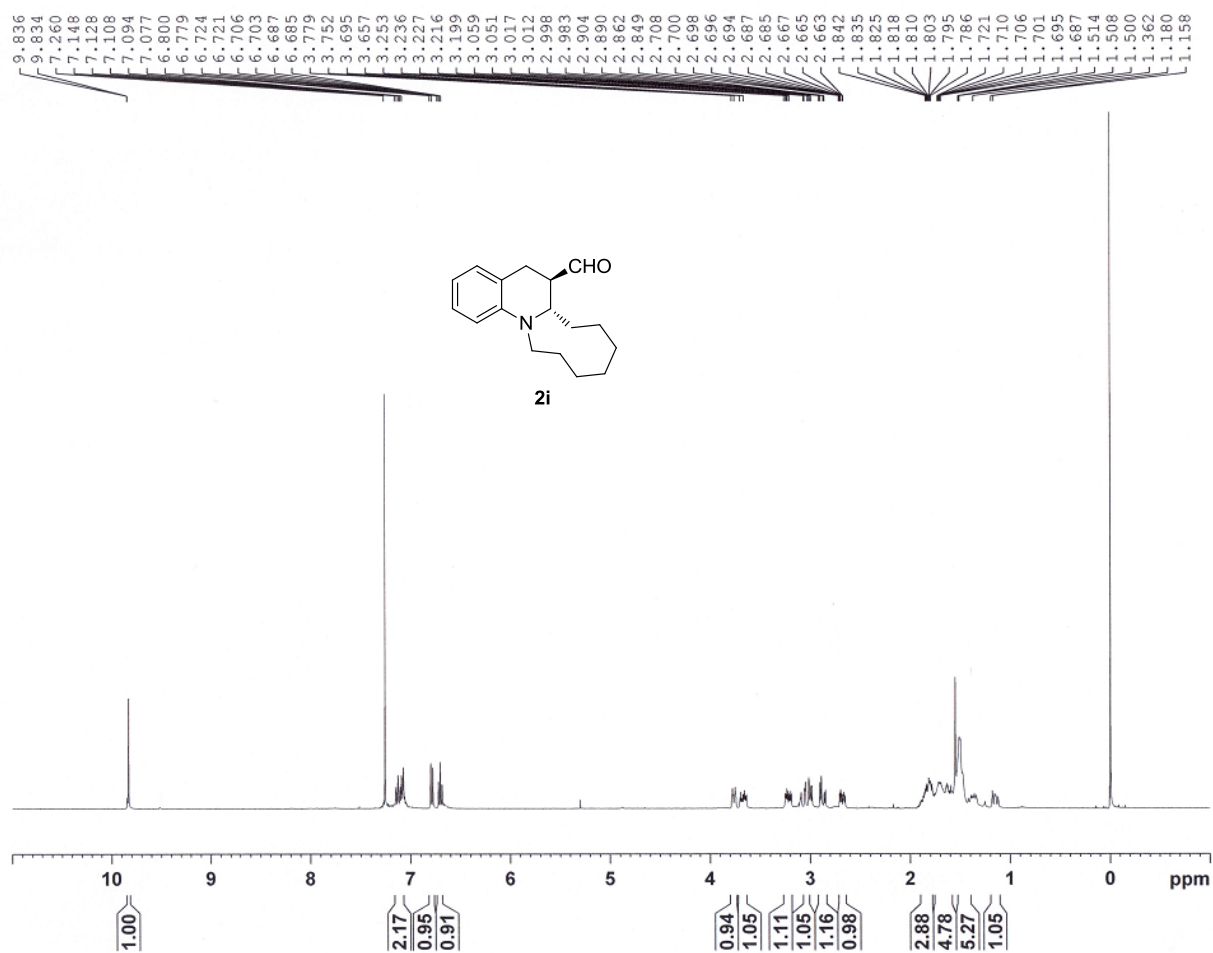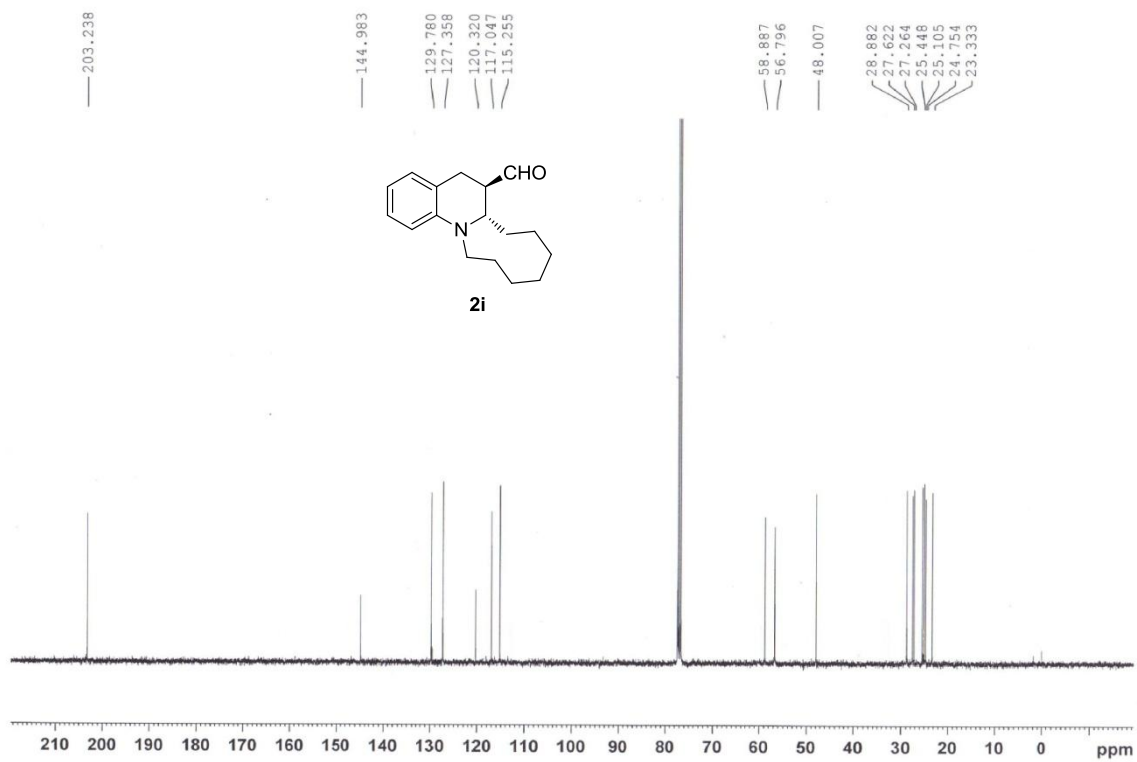



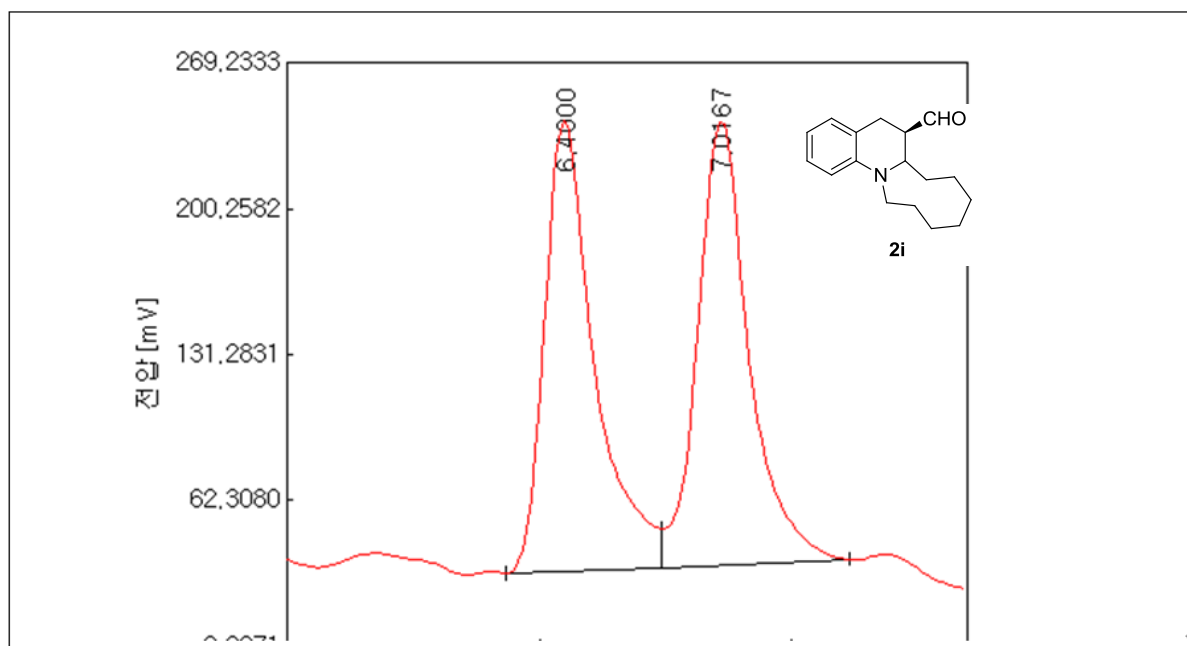

분석 결과

| 번호 | RT[분]  | 면적 [mV*s] | 형태 | 폭 [초]   | 면적%     |
|----|--------|-----------|----|---------|---------|
| 1  | 6.4000 | 3039.9738 | BB | 37.0000 | 49.5289 |
| 2  | 7.0167 | 3097.8071 | BB | 45.0000 | 50.4711 |

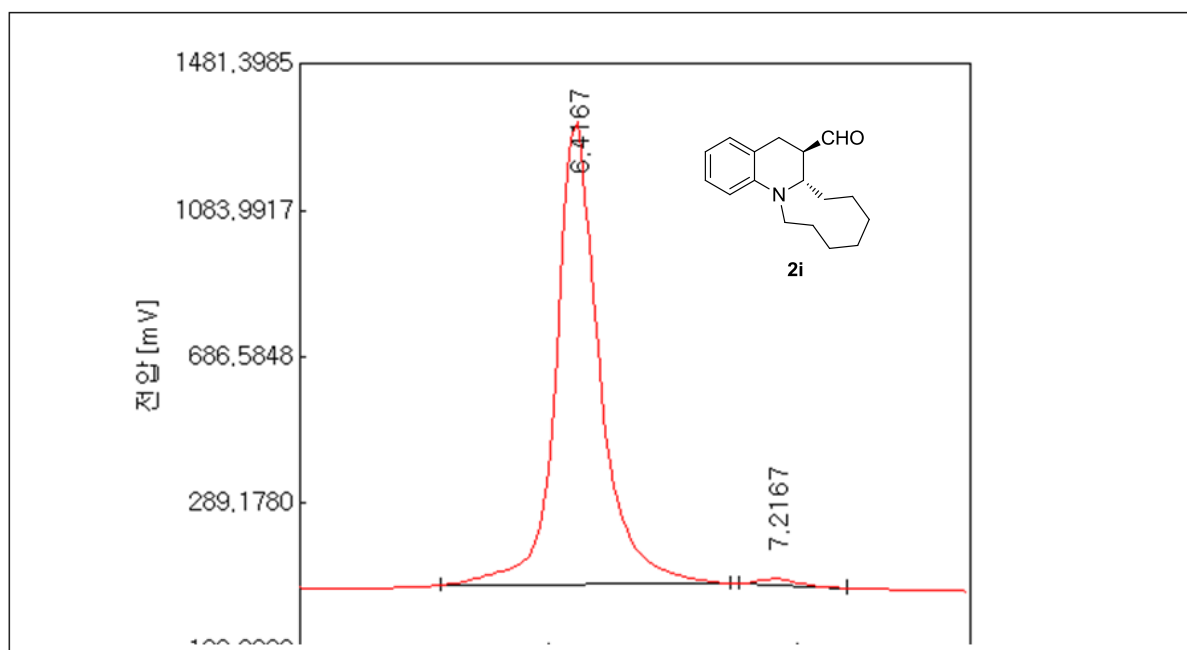

분석 결과

| 번호 | RT[분]  | 면적 [mV*s]  | 형태 | 폭 [초]   | 면적%     |
|----|--------|------------|----|---------|---------|
| 1  | 6.4167 | 16029.2550 | FF | 70.0000 | 98.8728 |
| 2  | 7.2167 | 182.7363   | FF | 26.0000 | 1.1272  |

9.811  
9.809  
7.199  
7.193  
7.175  
6.651  
6.628  
3.776  
3.769  
3.750  
3.636  
3.607  
3.598  
3.588  
3.579  
3.251  
3.243  
3.234  
3.225  
3.214  
3.205  
3.196  
3.057  
3.023  
3.015  
2.981  
2.856  
2.842  
2.813  
2.800  
2.872  
2.663  
2.660  
2.658  
2.651  
2.649  
2.639  
2.638  
2.629  
2.626  
1.852  
1.831  
1.812  
1.803  
1.795  
1.786  
1.778  
1.773  
1.768  
1.763  
1.756  
1.752  
1.706  
1.692  
1.680  
1.682  
1.676  
1.671  
1.506  
1.500  
1.496  
1.492  
1.488  
1.478  
1.311  
1.173  
1.152

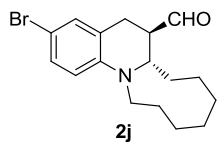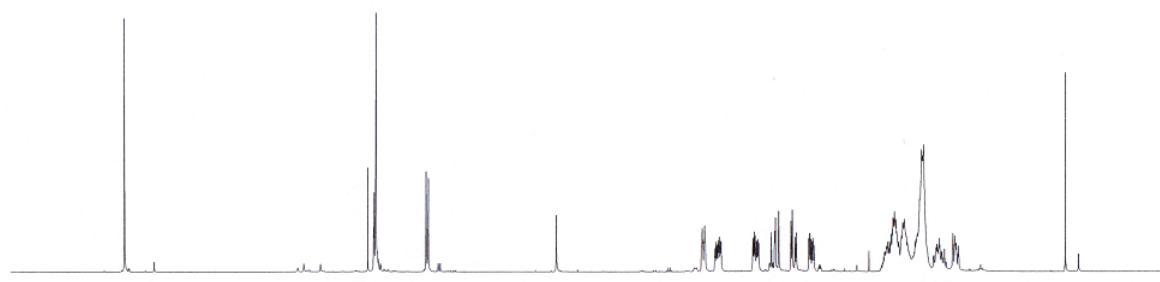

— 202.466

— 143.952

— 132.076

— 130.113

— 122.409

— 116.582

— 108.809

— 77.371

— 77.054

— 76.736

— 58.921

— 56.752

— 47.822

— 28.817

— 27.463

— 27.108

— 25.518

— 25.166

— 24.749

— 23.158

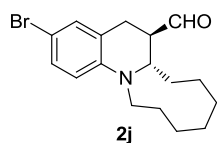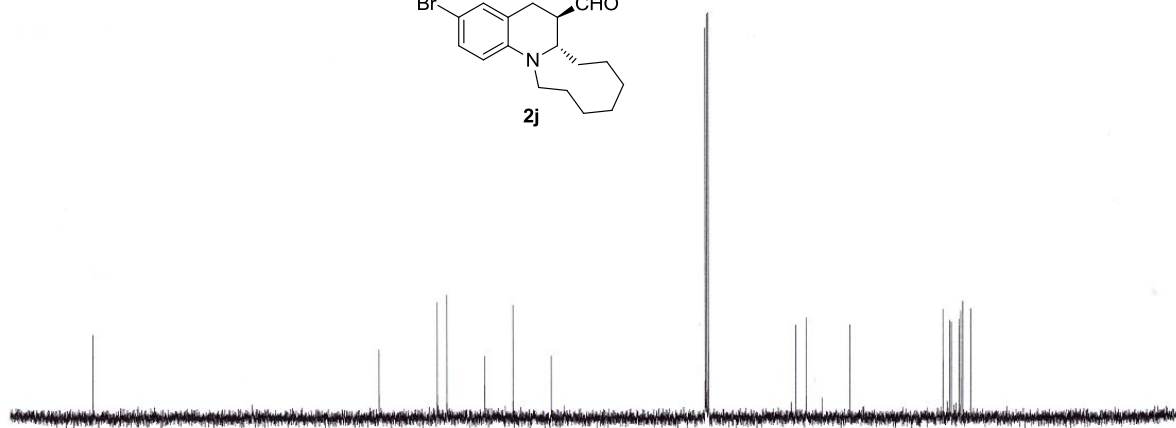

210 200 190 180 170 160 150 140 130 120 110 100 90 80 70 60 50 40 30 20 10 0 ppm

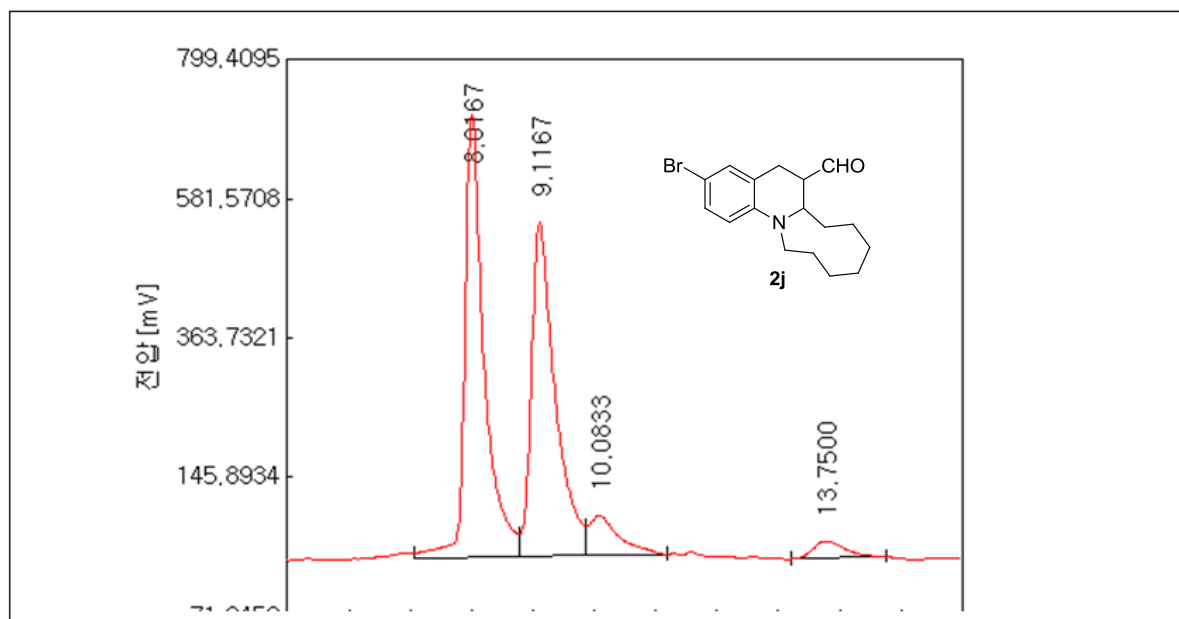

분석 결과

| 번호 | RT[분]   | 면적 [mV*s]  | 형태 | 폭[초]     | 면적%     |
|----|---------|------------|----|----------|---------|
| 1  | 8.0167  | 15825.9074 | VB | 102.0000 | 46.9534 |
| 2  | 9.1167  | 14655.6514 | BB | 66.0000  | 43.4814 |
| 3  | 10.0833 | 2209.9942  | BB | 79.0000  | 6.5568  |
| 4  | 13.7500 | 1014.0415  | FF | 92.0000  | 3.0085  |

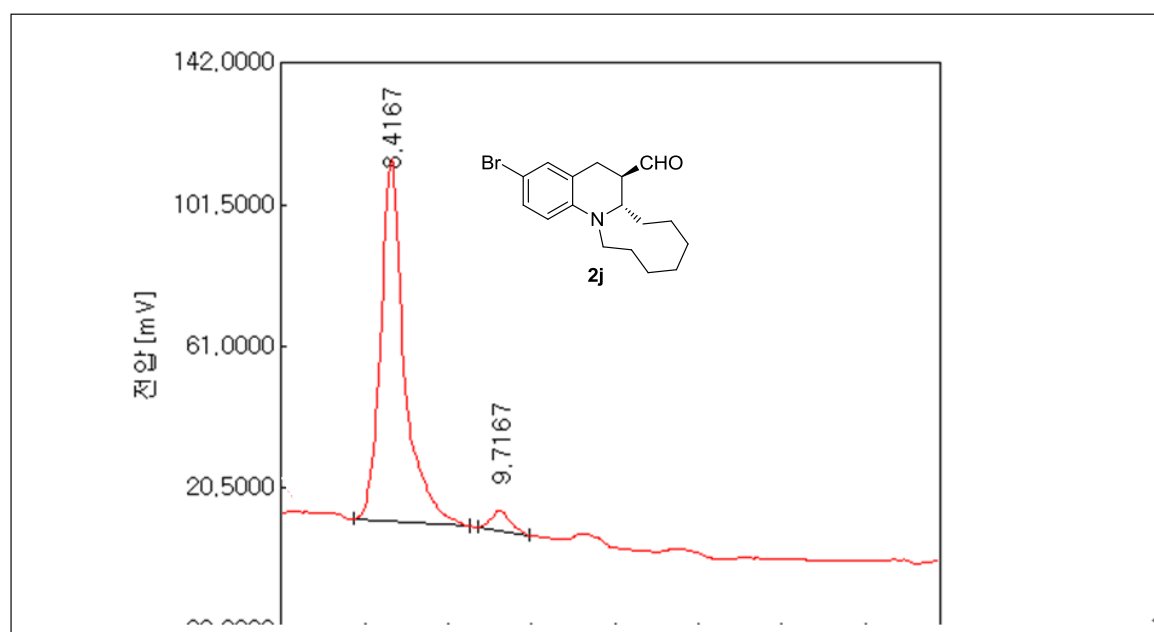

분석 결과

| 번호 | RT[분]  | 면적 [mV*s] | 형태 | 폭[초]    | 면적%     |
|----|--------|-----------|----|---------|---------|
| 1  | 8.4167 | 2039.3506 | BB | 84.0000 | 95.5407 |
| 2  | 9.7167 | 95.1864   | FF | 37.0000 | 4.4593  |

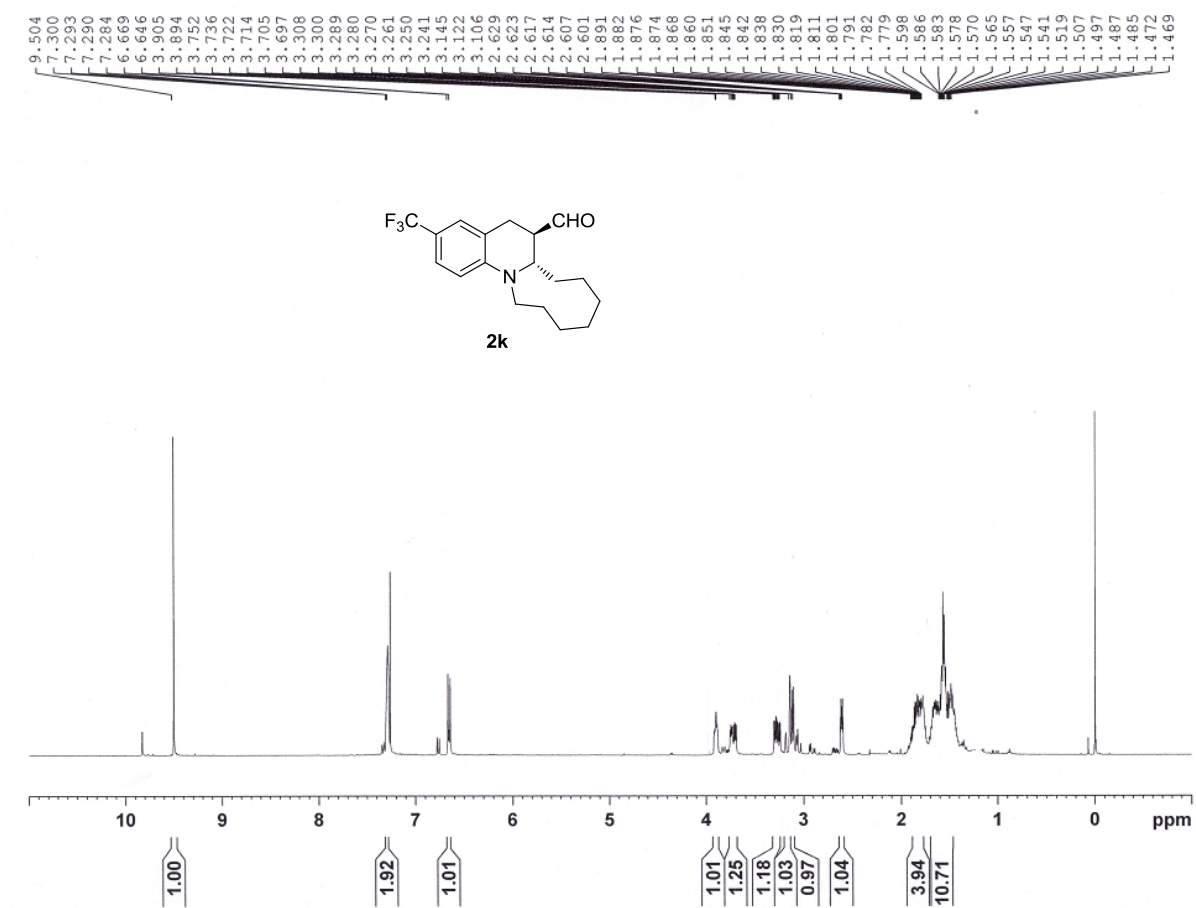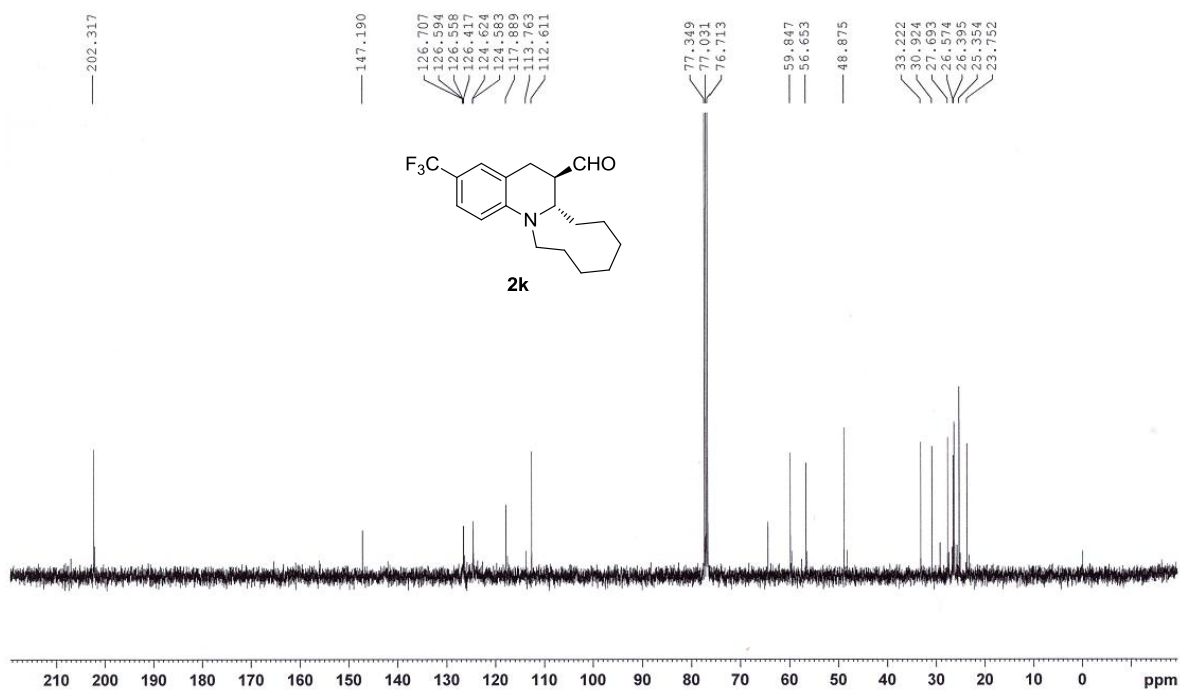

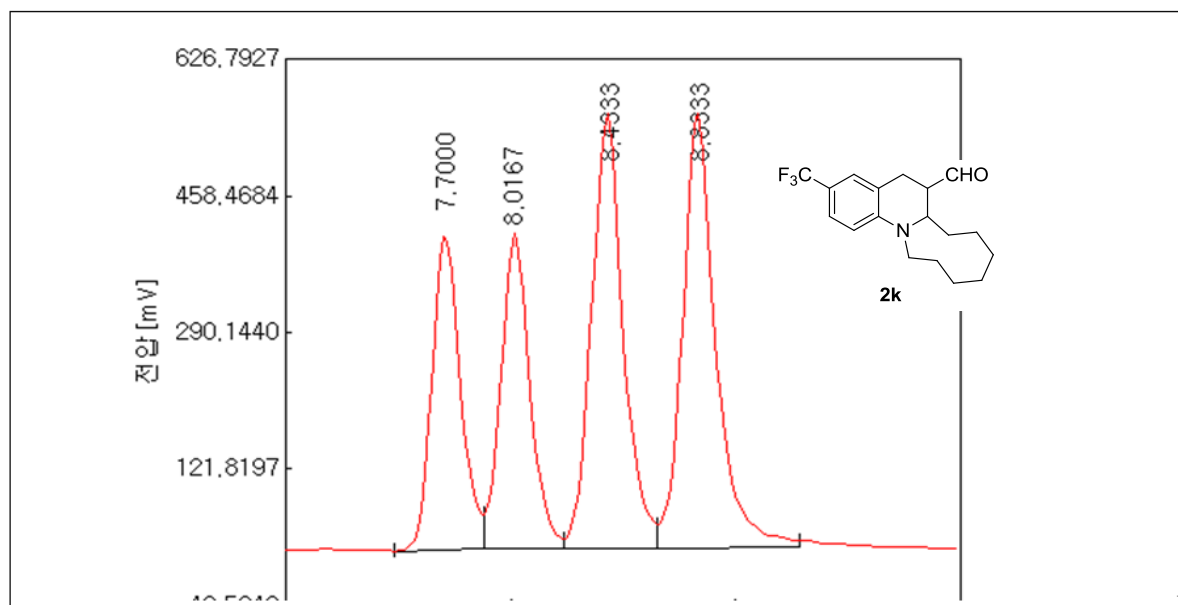

분석 결과

| 번호 | RT[분]  | 면적 [mV*s] | 형태 | 폭 [초]   | 면적%     |
|----|--------|-----------|----|---------|---------|
| 1  | 7.7000 | 3539.2566 | BV | 24.0000 | 19.3692 |
| 2  | 8.0167 | 3596.4558 | BV | 21.0000 | 19.6822 |
| 3  | 8.4333 | 5412.4912 | BB | 25.0000 | 29.6208 |
| 4  | 8.8333 | 5724.4267 | BV | 38.0000 | 31.3279 |

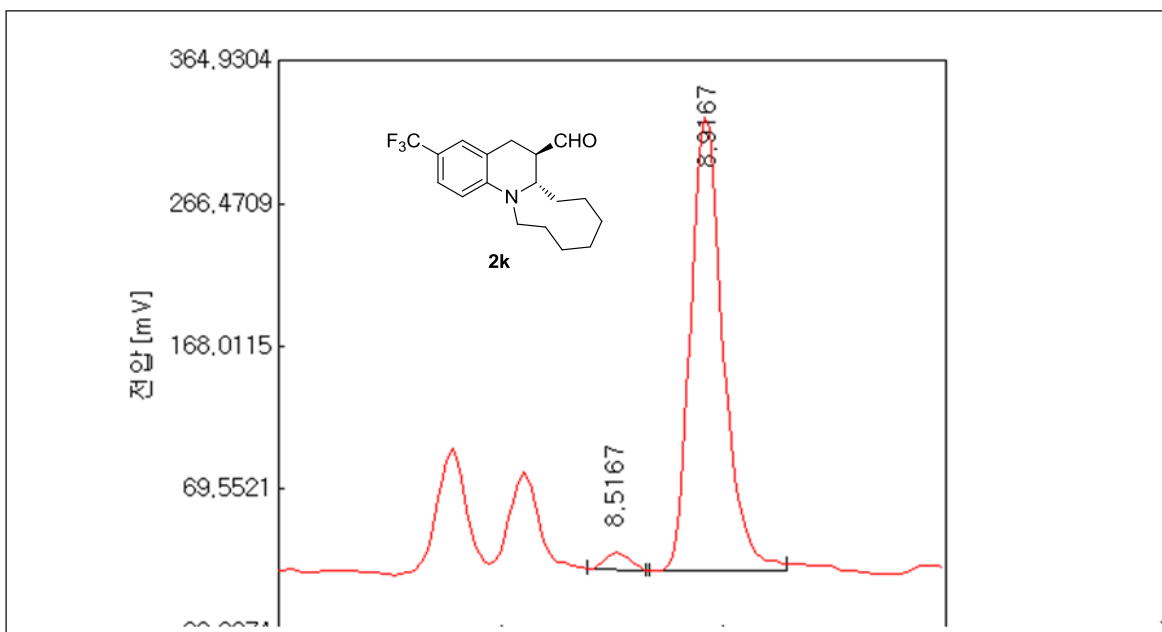

분석 결과

| 번호 | RT[분]  | 면적 [mV*s] | 형태 | 폭 [초]   | 면적%     |
|----|--------|-----------|----|---------|---------|
| 1  | 8.5167 | 95.3366   | FF | 16.0000 | 2.7954  |
| 2  | 8.9167 | 3315.1881 | BV | 37.0000 | 97.2046 |

9.811  
6.983  
6.983  
6.717  
6.712  
6.660  
6.655  
6.640  
6.635  
3.783  
3.776  
3.763  
3.756  
3.750  
3.670  
3.642  
3.632  
3.623  
3.614  
3.258  
3.240  
3.231  
3.221  
3.202  
3.024  
3.022  
2.988  
2.982  
2.948  
2.857  
2.843  
2.814  
2.801  
2.669  
2.659  
2.656  
2.647  
2.635  
2.625  
2.622  
1.861  
1.840  
1.829  
1.821  
1.812  
1.803  
1.790  
1.780  
1.771  
1.703  
1.693  
1.682  
1.676  
1.662  
1.623  
1.548  
1.530  
1.519  
1.503  
1.490  
1.469  
1.460  
1.327  
1.191  
1.170

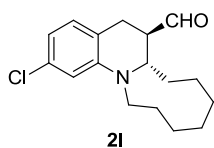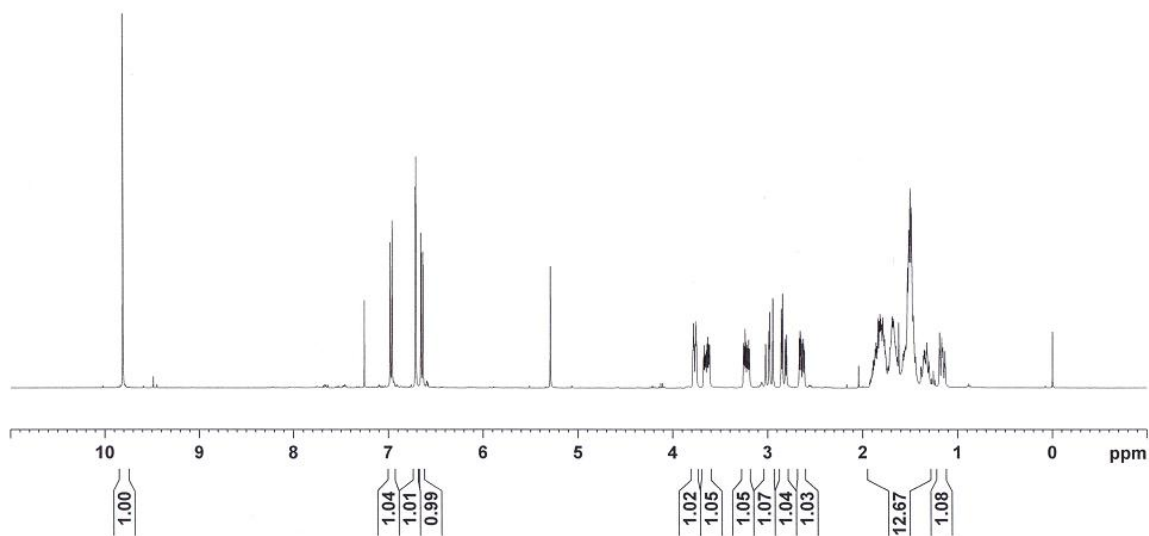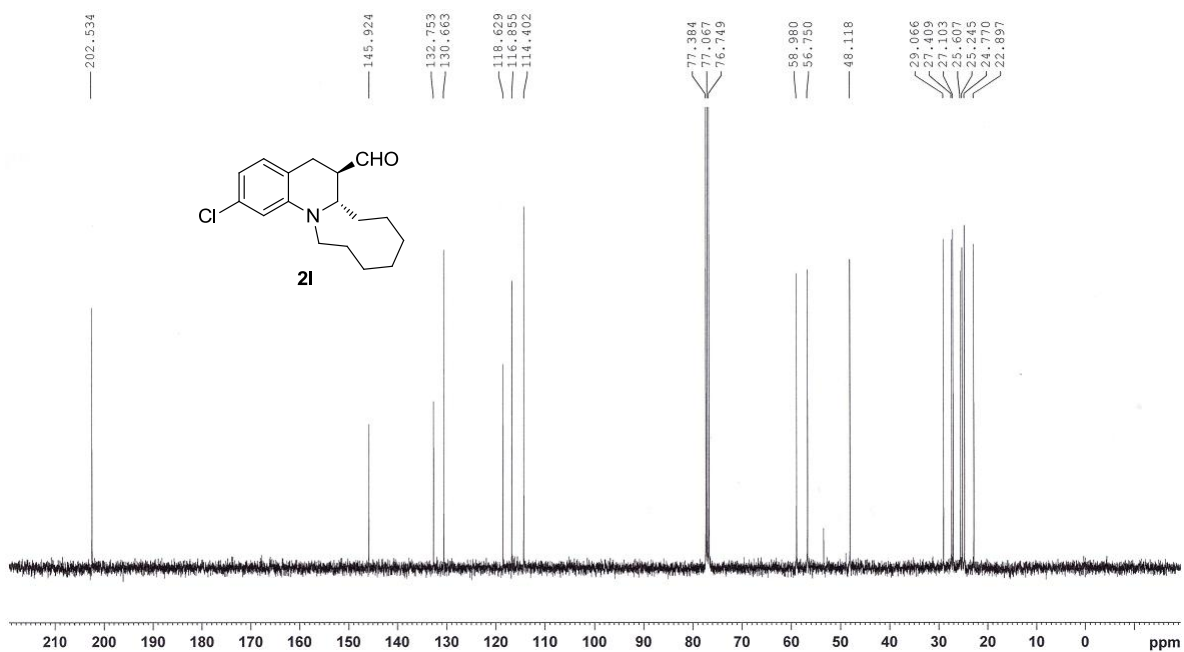

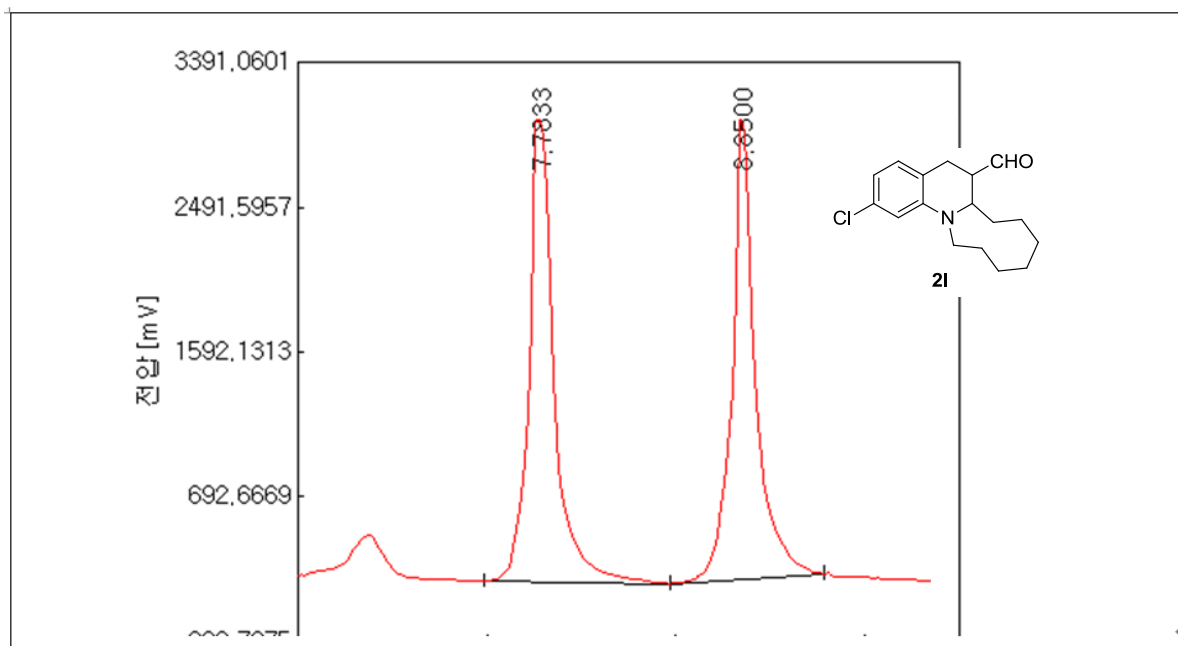

분석 결과

| 번호 | RT[분]  | 면적 [mV*s]  | 형태 | 폭[초]    | 면적%     |
|----|--------|------------|----|---------|---------|
| 1  | 7.7833 | 27936.2758 | VV | 59.0000 | 51.8857 |
| 2  | 8.8500 | 25905.6347 | VV | 49.0000 | 48.1143 |

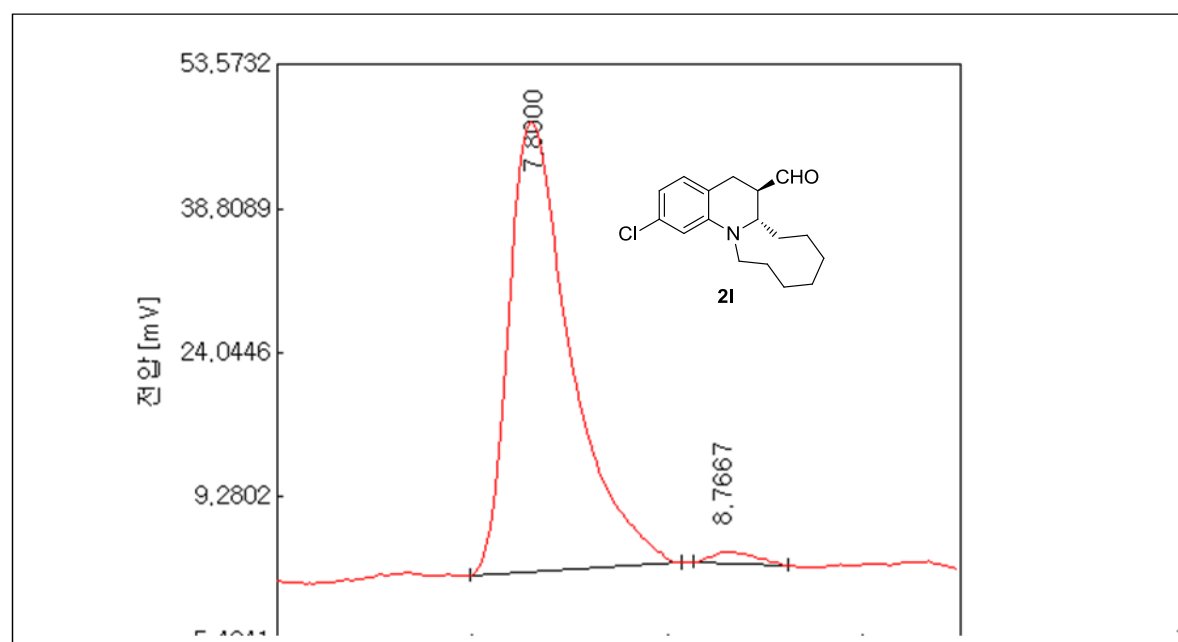

분석 결과

| 번호 | RT[분]  | 면적 [mV*s] | 형태 | 폭[초]    | 면적%     |
|----|--------|-----------|----|---------|---------|
| 1  | 7.8000 | 1057.7961 | BB | 65.0000 | 98.2131 |
| 2  | 8.7667 | 19.2452   | FF | 29.0000 | 1.7869  |

9.823  
9.822  
7.258  
6.841  
6.834  
6.820  
6.811  
6.810  
6.802  
6.787  
6.779  
6.734  
6.722  
6.712  
6.700  
3.740  
3.526  
3.234  
3.226  
3.217  
3.217  
3.189  
3.036  
3.029  
2.994  
2.853  
2.840  
2.811  
2.797  
2.701  
2.700  
2.692  
2.690  
2.688  
2.686  
2.679  
2.677  
2.659  
2.657  
1.846  
1.839  
1.826  
1.793  
1.773  
1.769  
1.760  
1.752  
1.743  
1.738  
1.729  
1.721  
1.712  
1.702  
1.696  
1.688  
1.680  
1.605  
1.535  
1.501  
1.493  
1.468  
1.534  
1.506  
1.131  
1.109  
1.103  
1.096

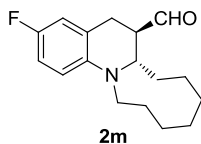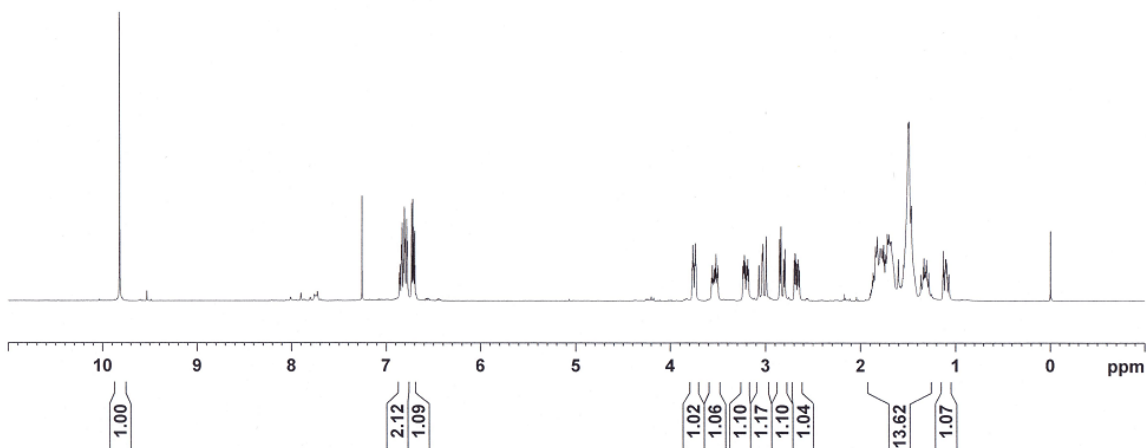

202.778

156.555  
154.208

141.381

121.816  
121.745  
116.590  
116.516  
115.735  
115.518  
114.195  
113.975

77.364  
77.047

58.208  
57.216

47.474

28.524  
27.539  
27.449  
24.894  
24.701  
23.386

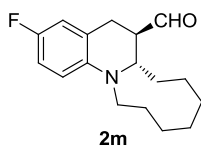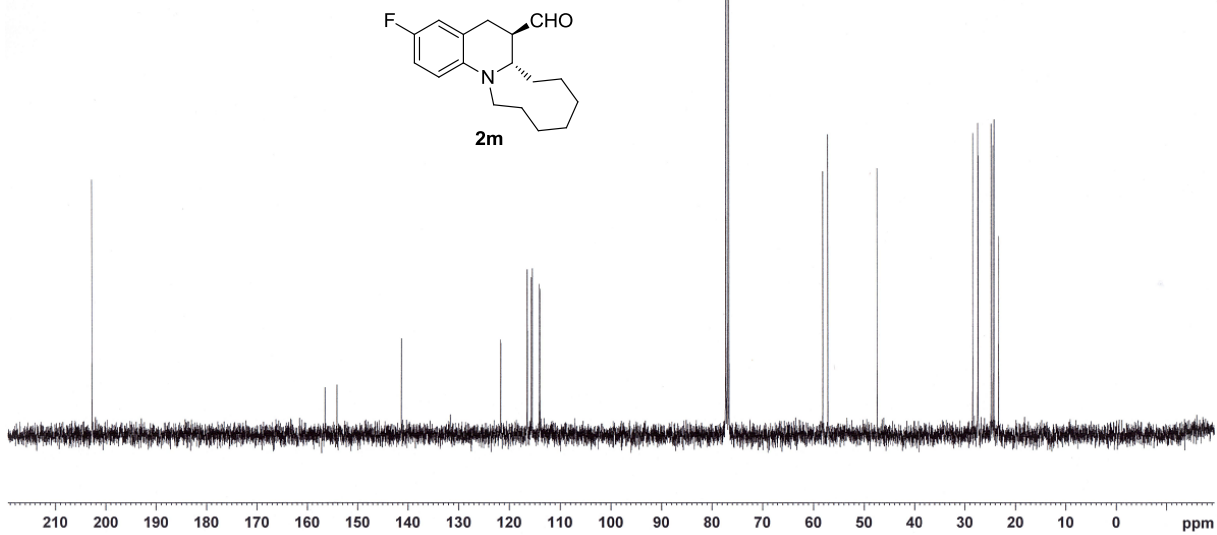



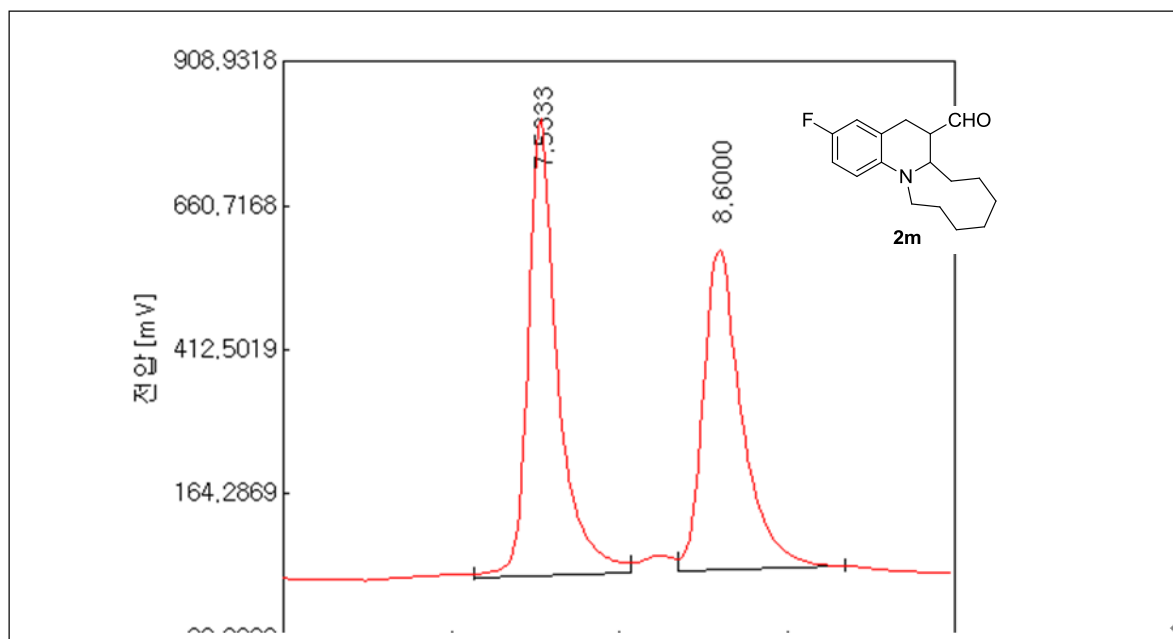

분석 결과

| 번호 | RT[분]  | 면적 [mV*s]  | 형태 | 폭 [초]   | 면적%     |
|----|--------|------------|----|---------|---------|
| 1  | 7.5333 | 10059.5523 | VV | 56.0000 | 52.2806 |
| 2  | 8.6000 | 9181.8961  | VB | 60.0000 | 47.7194 |

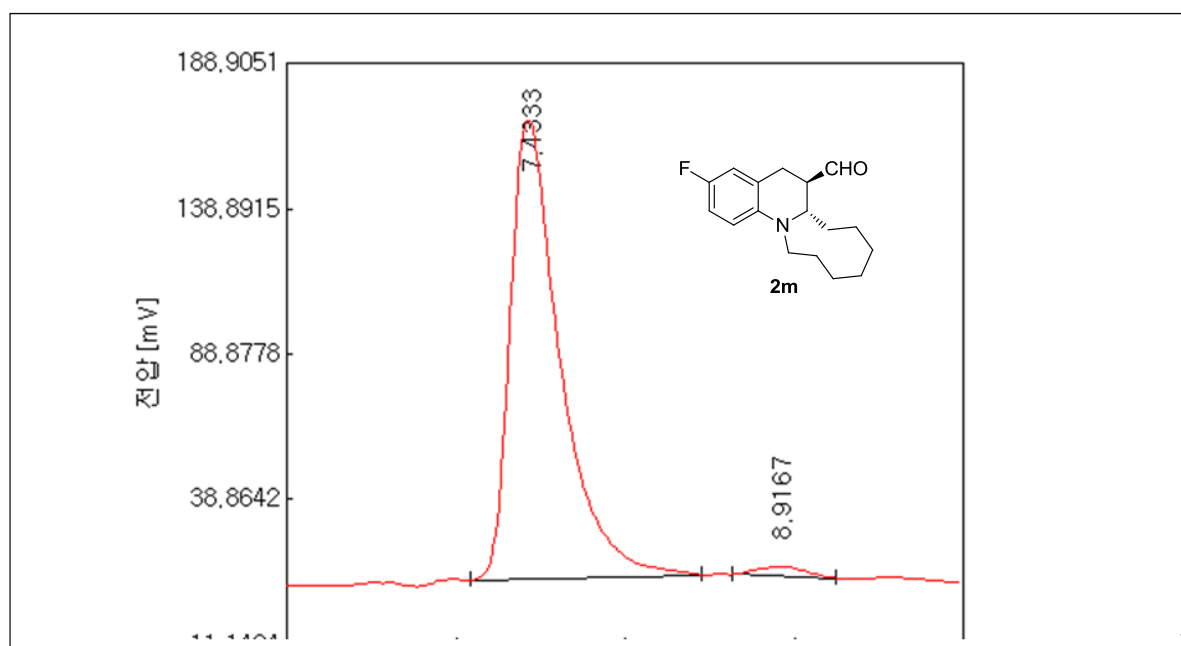

분석 결과

| 번호 | RT[분]  | 면적 [mV*s] | 형태 | 폭 [초]   | 면적%     |
|----|--------|-----------|----|---------|---------|
| 1  | 7.4333 | 3375.2458 | BV | 82.0000 | 97.9657 |
| 2  | 8.9167 | 70.0880   | FF | 37.0000 | 2.0343  |

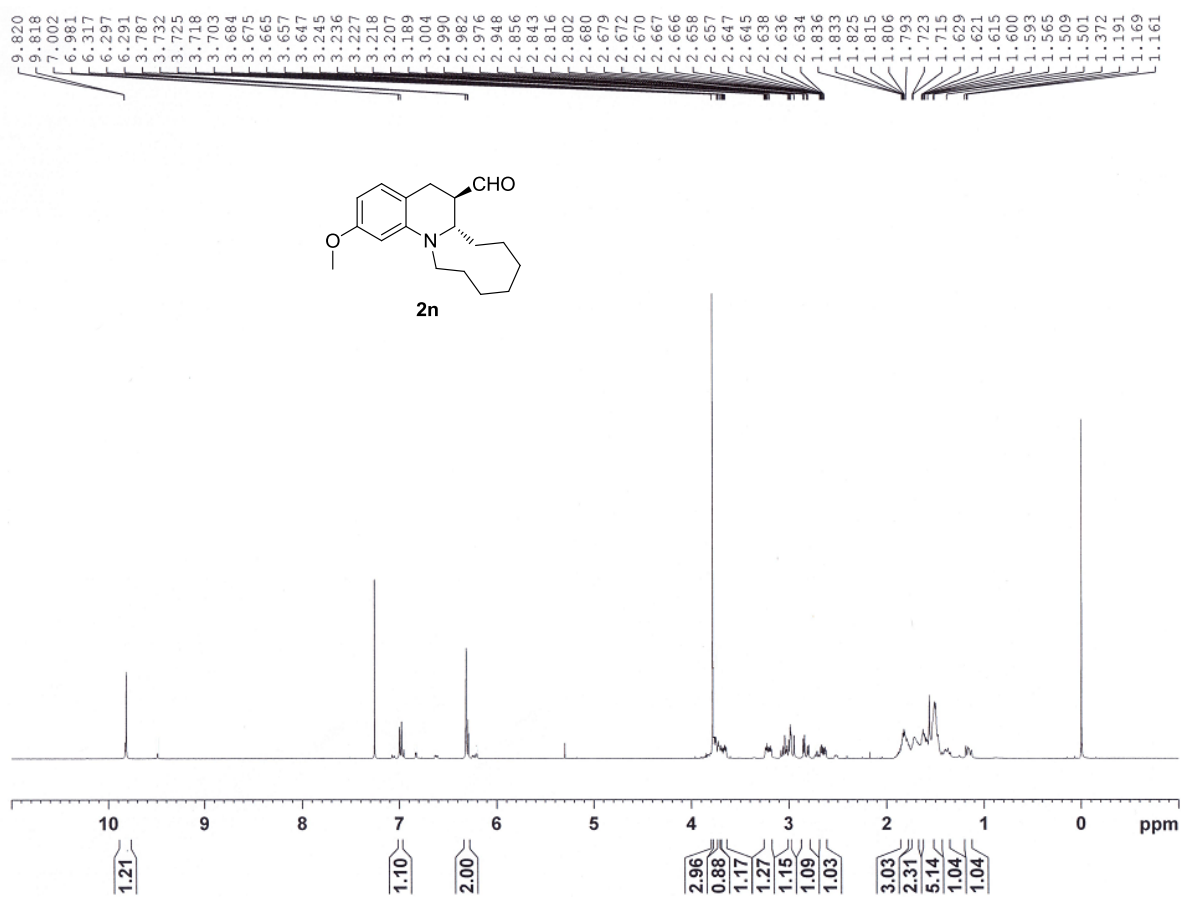

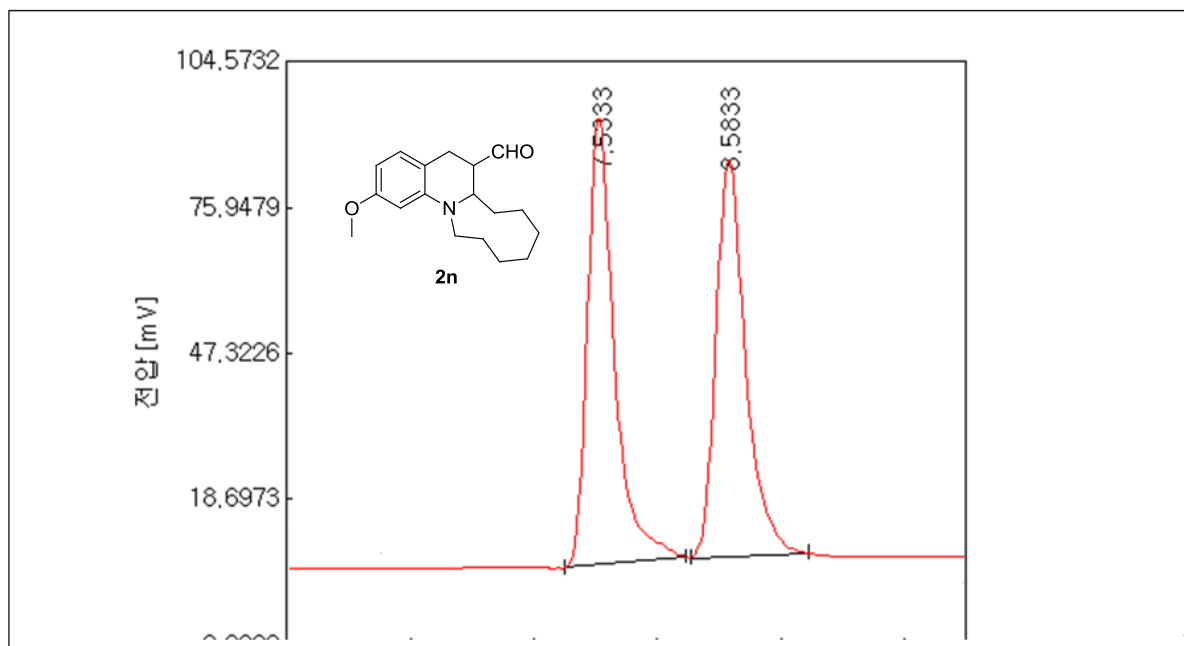

분석 결과

| 번호 | RT[분]  | 면적 [mV*s] | 형태 | 폭 [초]   | 면적%     |
|----|--------|-----------|----|---------|---------|
| 1  | 7.5333 | 1379.0729 | BB | 59.0000 | 50.5353 |
| 2  | 8.5833 | 1349.8594 | BB | 58.0000 | 49.4647 |

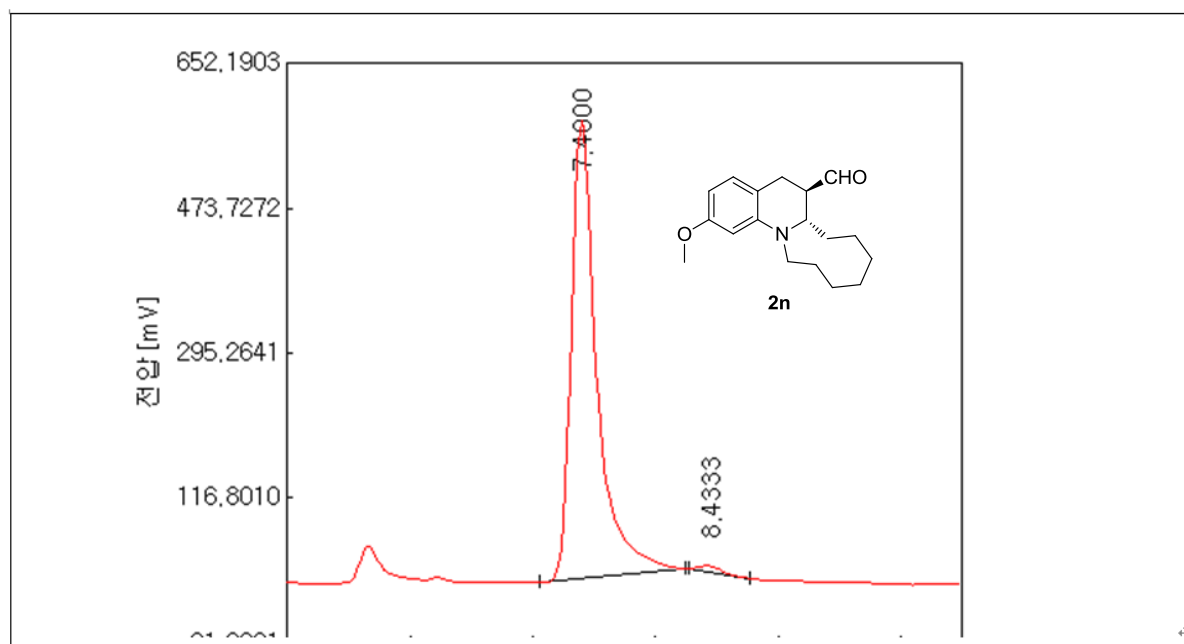

분석 결과

| 번호 | RT[분]  | 면적 [mV*s] | 형태 | 폭 [초]   | 면적%     |
|----|--------|-----------|----|---------|---------|
| 1  | 7.4000 | 8465.1441 | FF | 72.0000 | 98.8195 |
| 2  | 8.4333 | 101.1278  | FF | 30.0000 | 1.1805  |

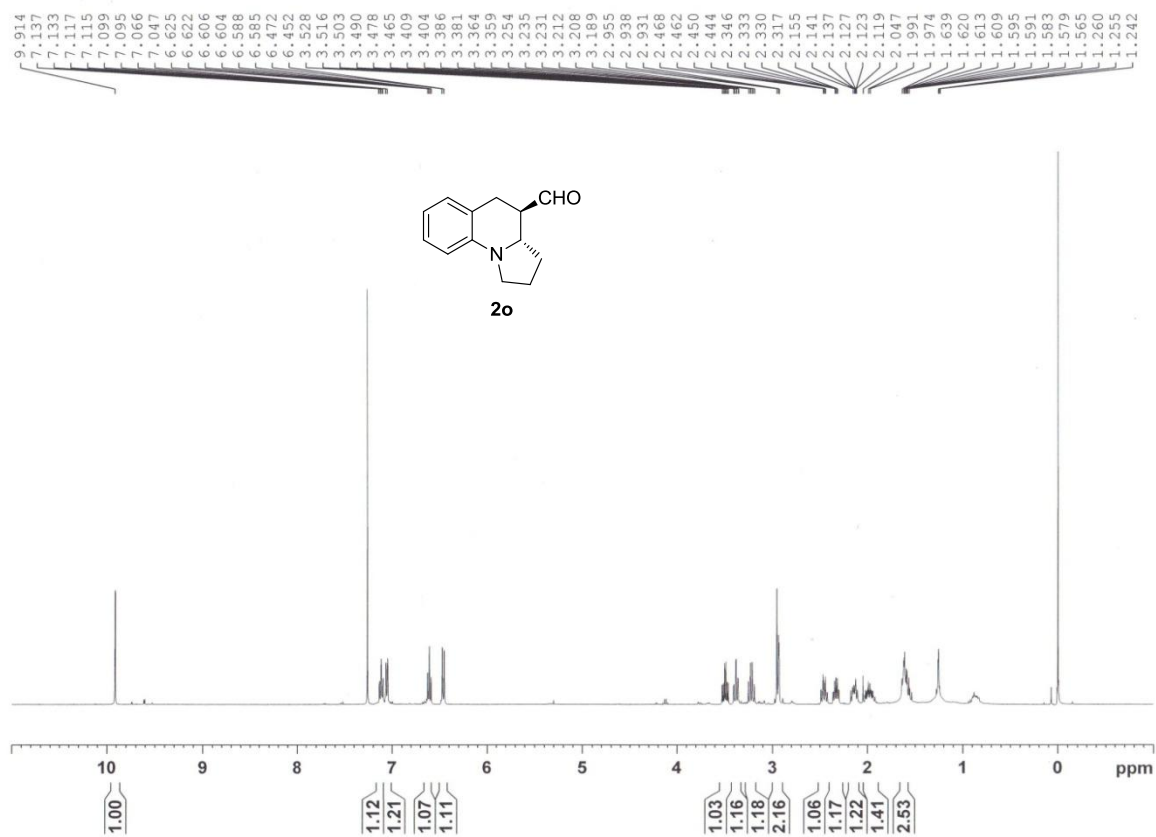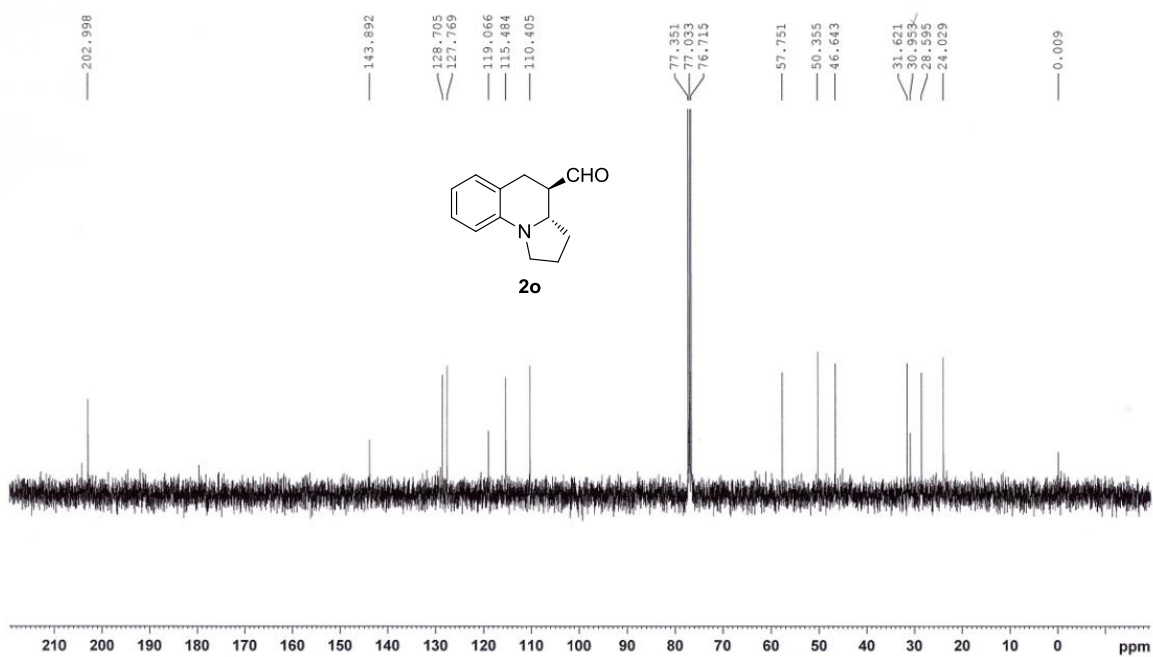

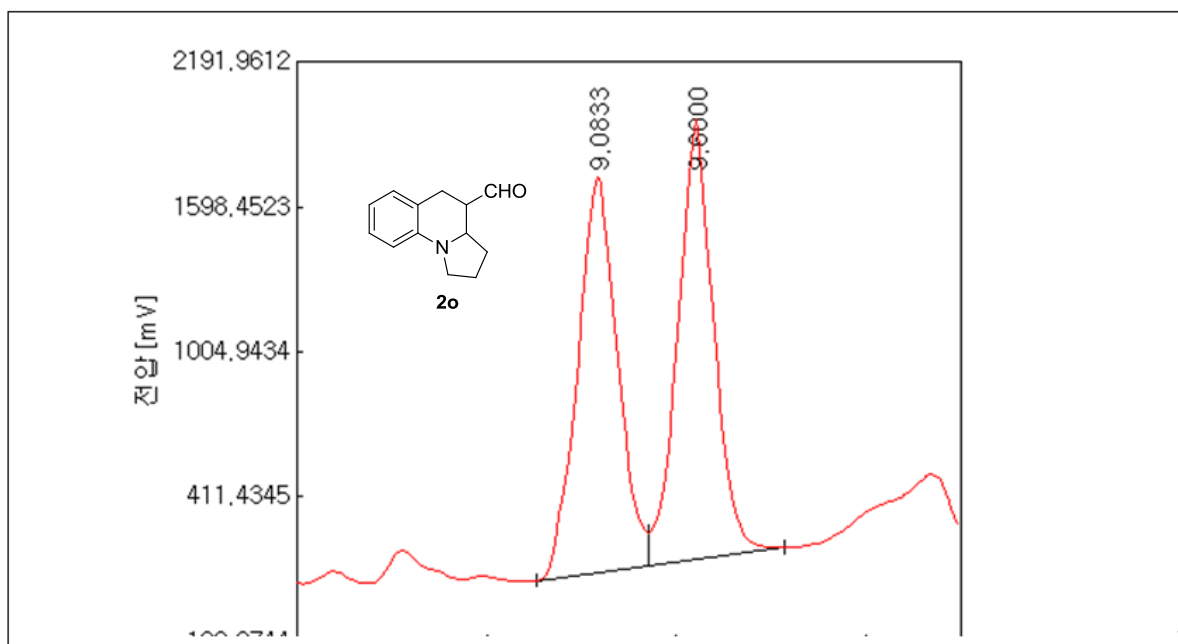

분석 결과

| 번호 | RT[분]  | 면적 [mV*s]  | 형태 | 폭[초]    | 면적%     |
|----|--------|------------|----|---------|---------|
| 1  | 9.0833 | 24313.7227 | BV | 35.0000 | 49.7426 |
| 2  | 9.6000 | 24565.3788 | VB | 43.0000 | 50.2574 |

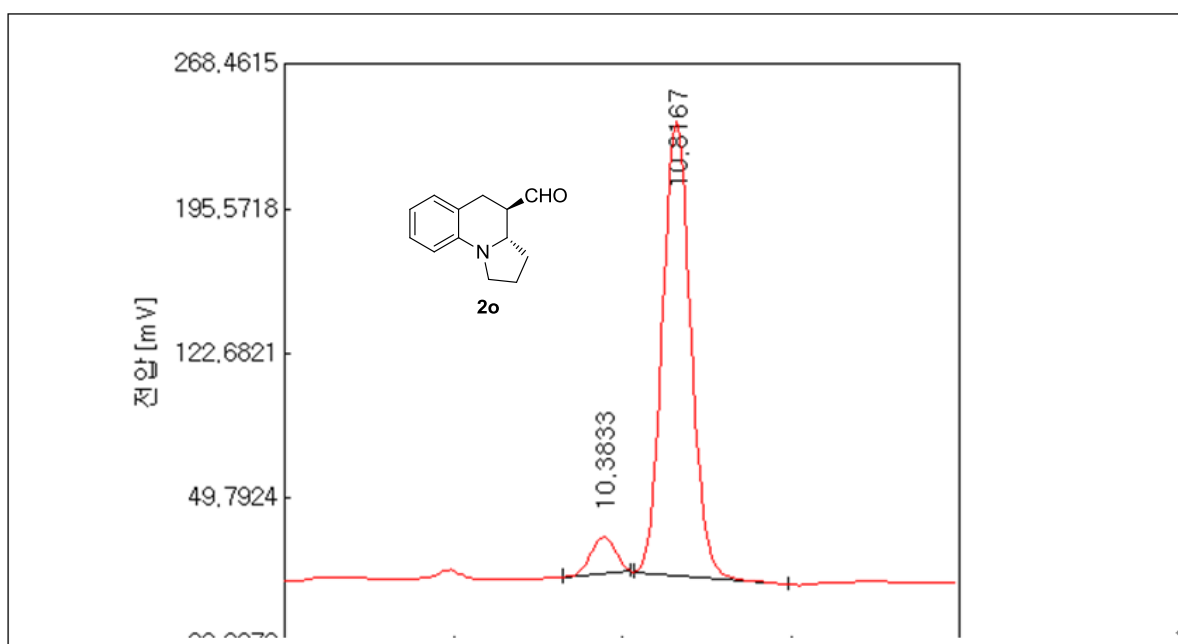

분석 결과

| 번호 | RT[분]   | 면적 [mV*s] | 형태 | 폭[초]    | 면적%     |
|----|---------|-----------|----|---------|---------|
| 1  | 10.3833 | 190.7781  | FF | 24.0000 | 6.4630  |
| 2  | 10.8167 | 2761.0712 | FF | 55.0000 | 93.5370 |

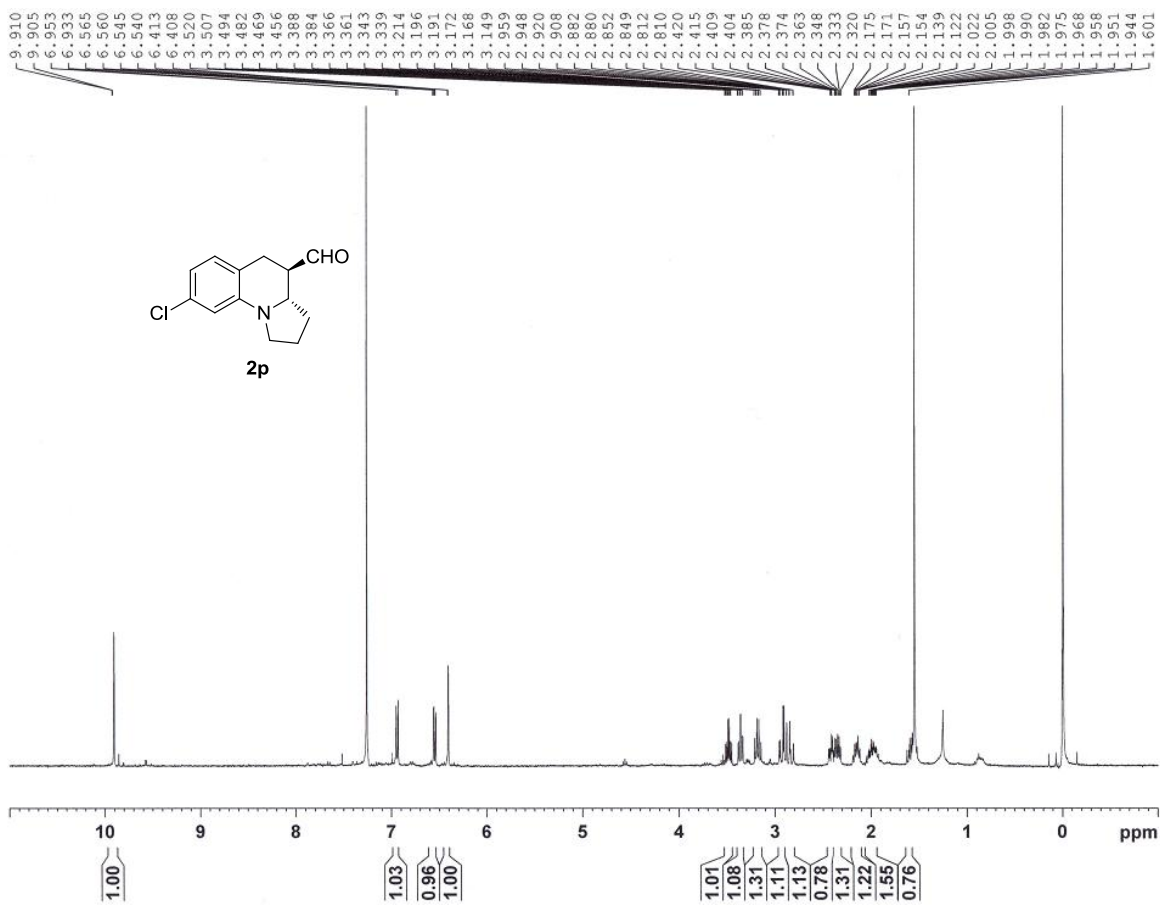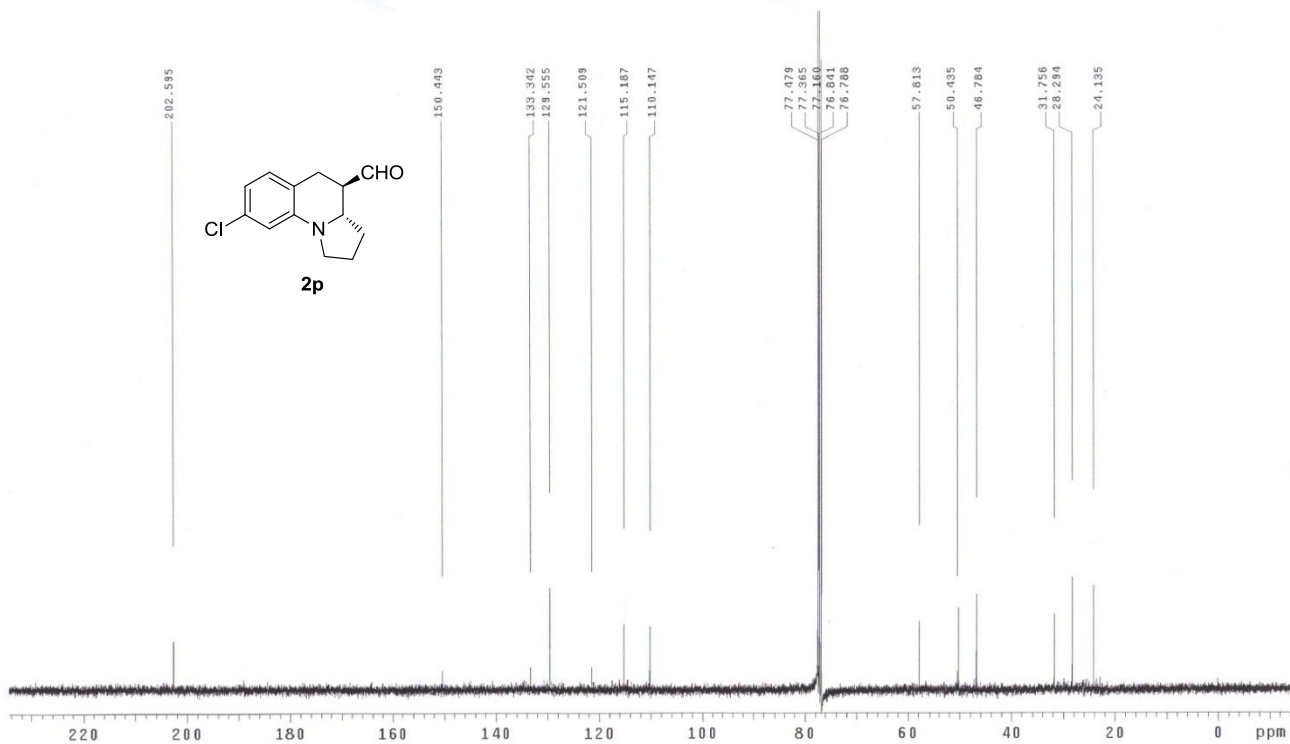

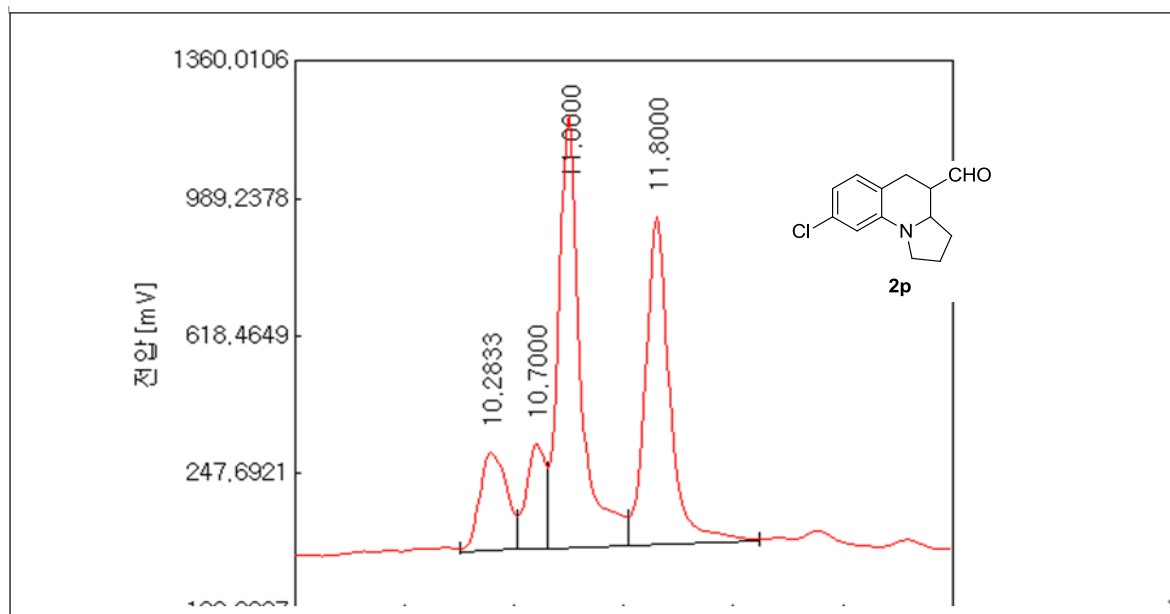

분석 결과

| 번호 | RT[분]   | 면적 [mV*s]  | 형태 | 폭[초]    | 면적%     |
|----|---------|------------|----|---------|---------|
| 1  | 10.2833 | 4670.7695  | VV | 32.0000 | 11.8348 |
| 2  | 10.7000 | 3381.9621  | VV | 16.0000 | 8.5692  |
| 3  | 11.0000 | 17186.2143 | VV | 44.0000 | 43.5466 |
| 4  | 11.8000 | 14227.3483 | VV | 72.0000 | 36.0494 |

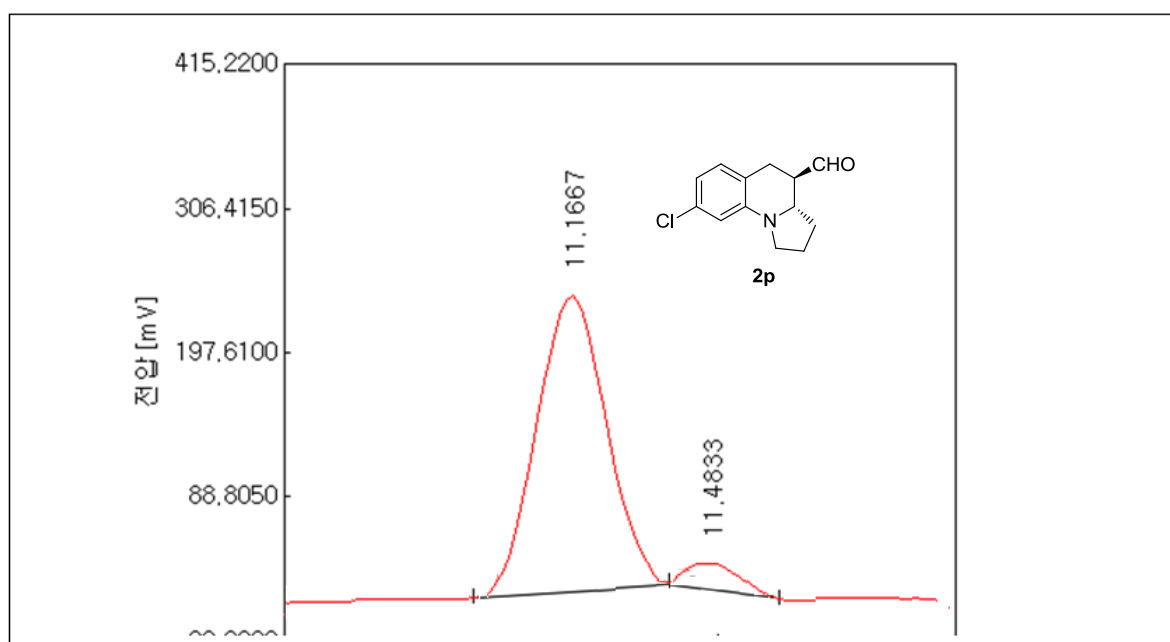

분석 결과

| 번호 | RT[분]   | 면적 [mV*s] | 형태 | 폭[초]    | 면적%     |
|----|---------|-----------|----|---------|---------|
| 1  | 11.1667 | 2363.7984 | FF | 28.0000 | 95.0924 |
| 2  | 11.4833 | 121.9919  | FF | 16.0000 | 4.9076  |

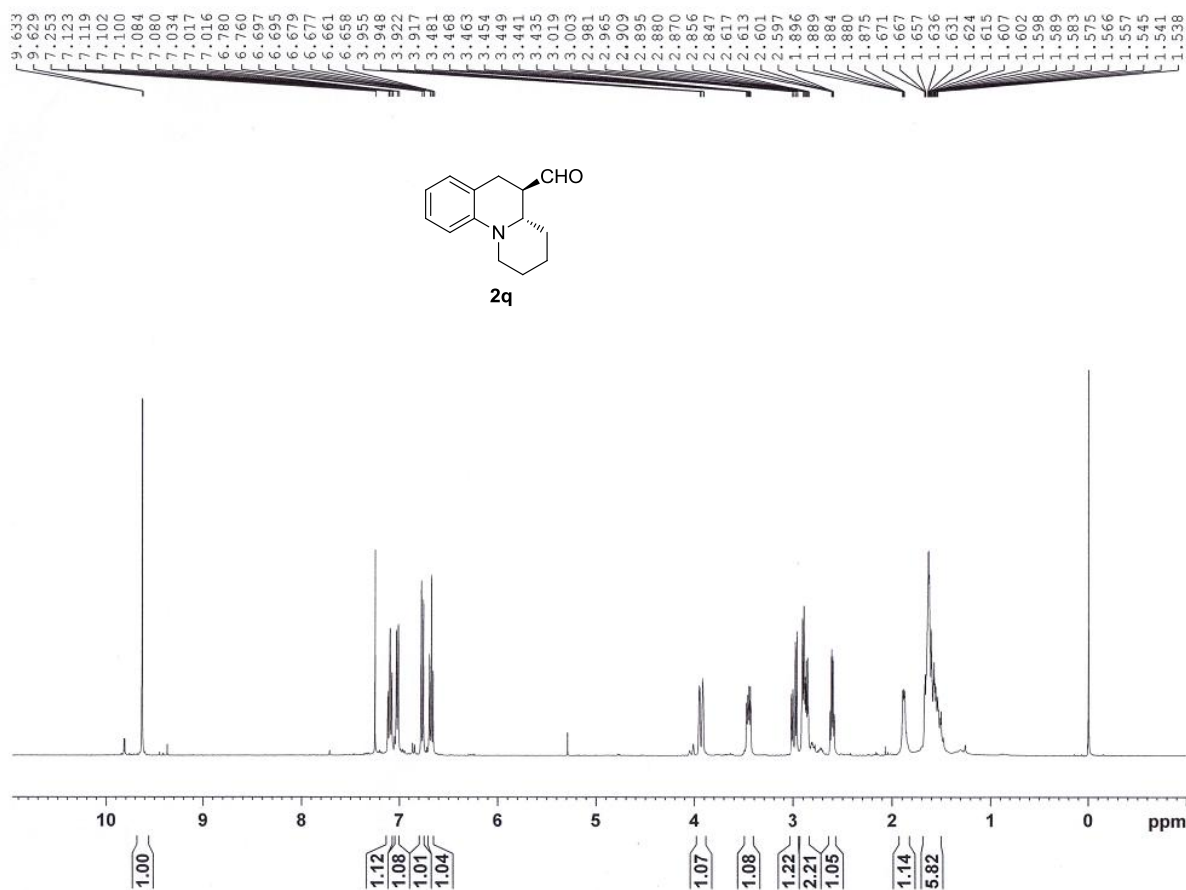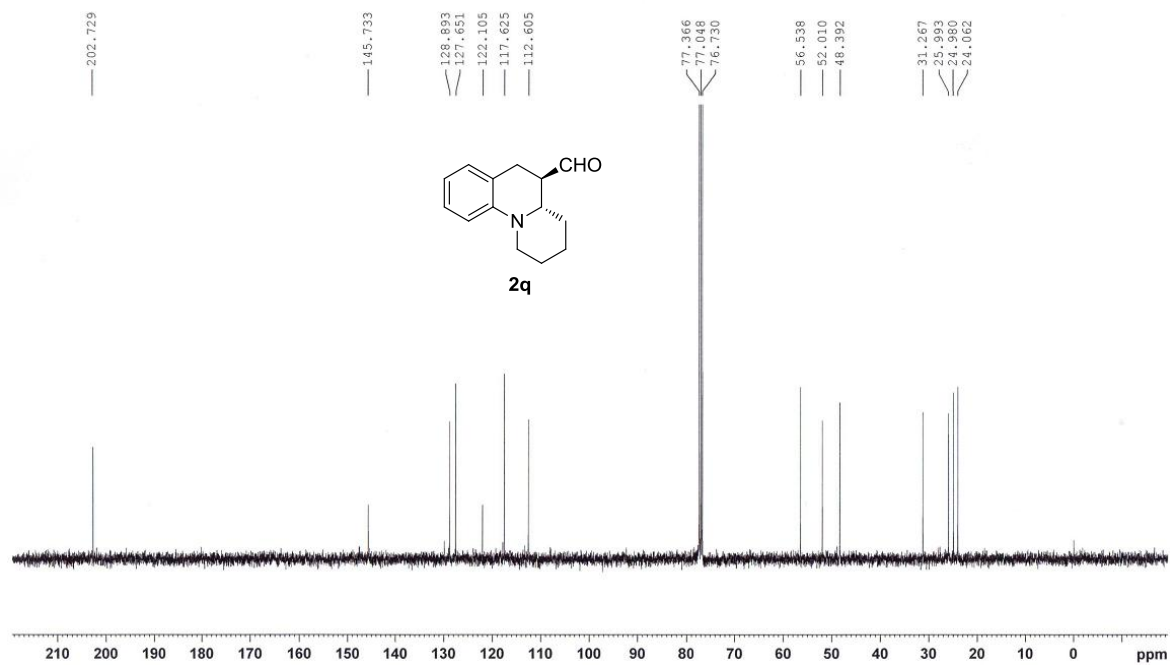



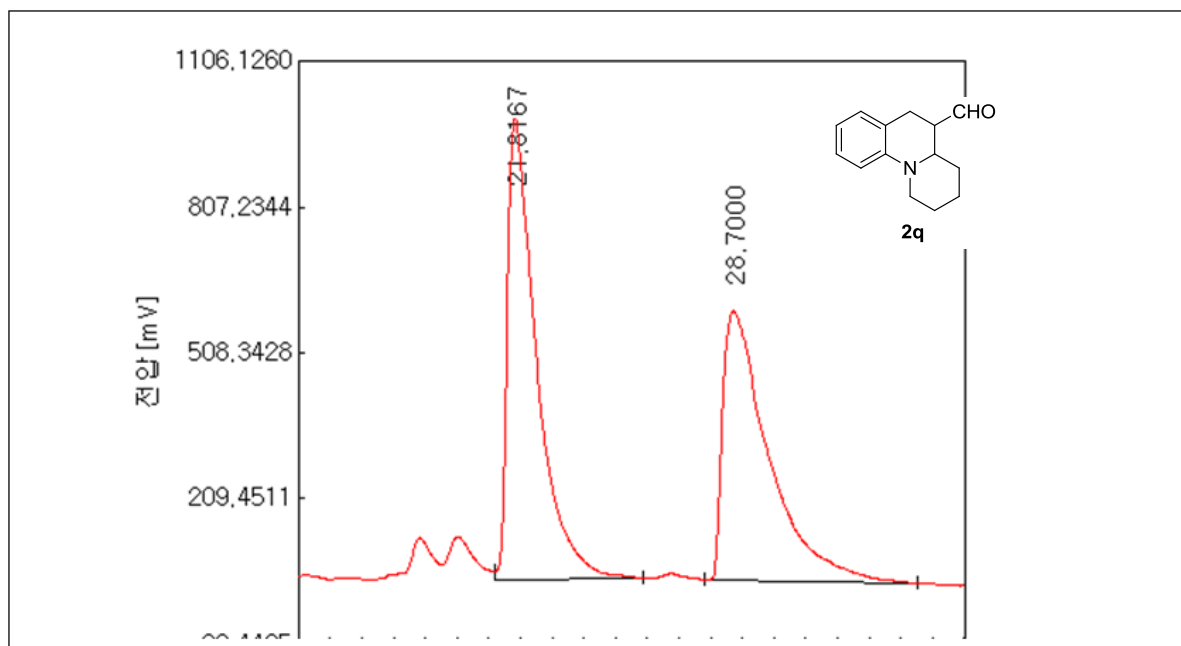

분석 결과

| 번호 | RT[분]   | 면적 [mV*s]  | 형태 | 폭[초]     | 면적%     |
|----|---------|------------|----|----------|---------|
| 1  | 21.8167 | 62411.8779 | BB | 281.0000 | 51.9628 |
| 2  | 28.7000 | 57696.8101 | FF | 402.0000 | 48.0372 |

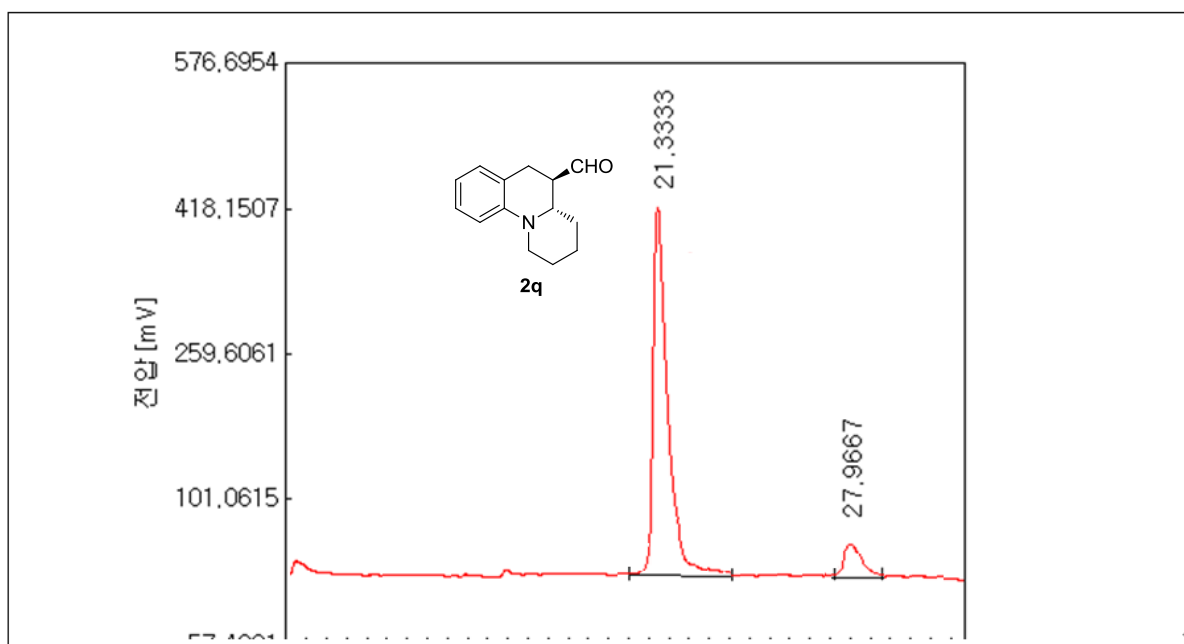

분석 결과

| 번호 | RT[분]   | 면적 [mV*s]  | 형태 | 폭[초]     | 면적%     |
|----|---------|------------|----|----------|---------|
| 1  | 21.3333 | 10743.1187 | PB | 170.0000 | 89.7214 |
| 2  | 27.9667 | 1230.7429  | FF | 110.0000 | 10.2786 |

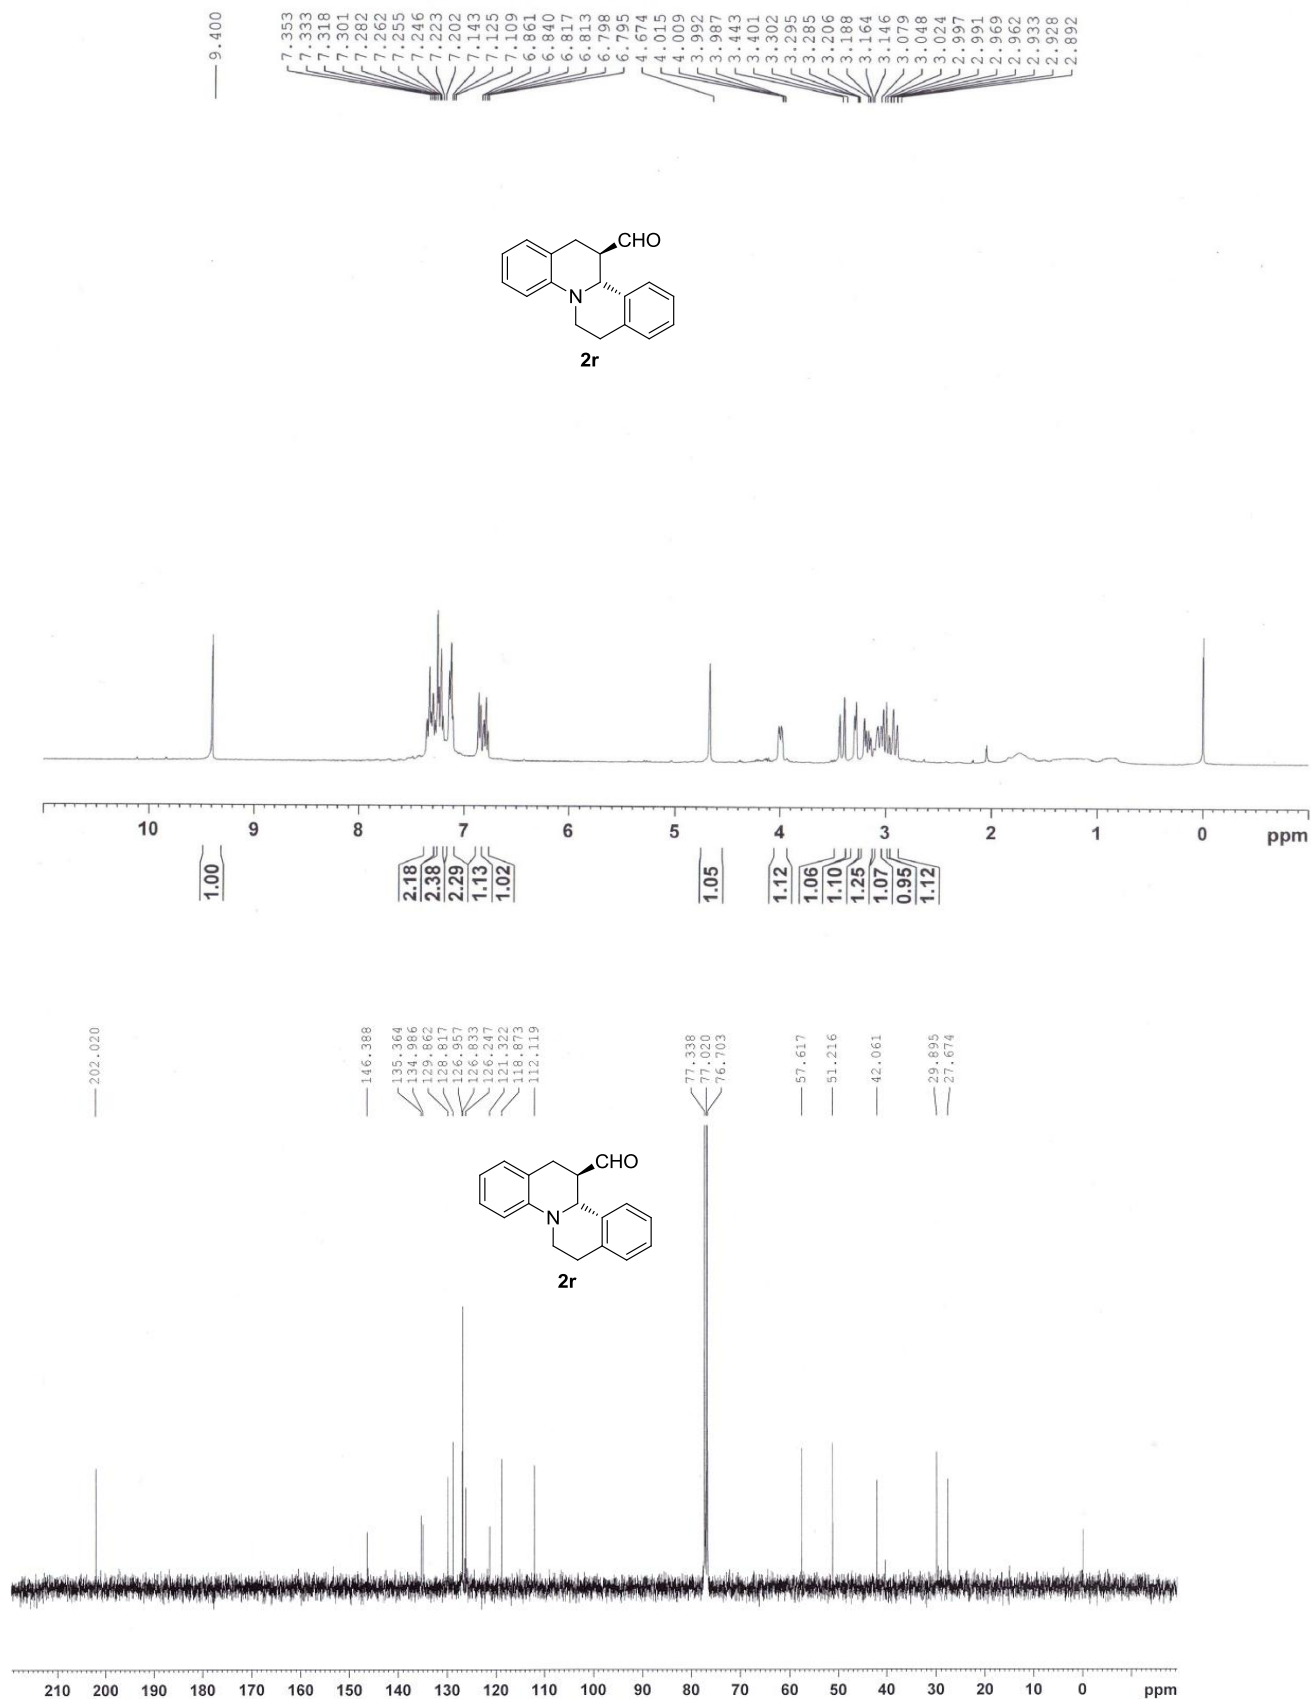

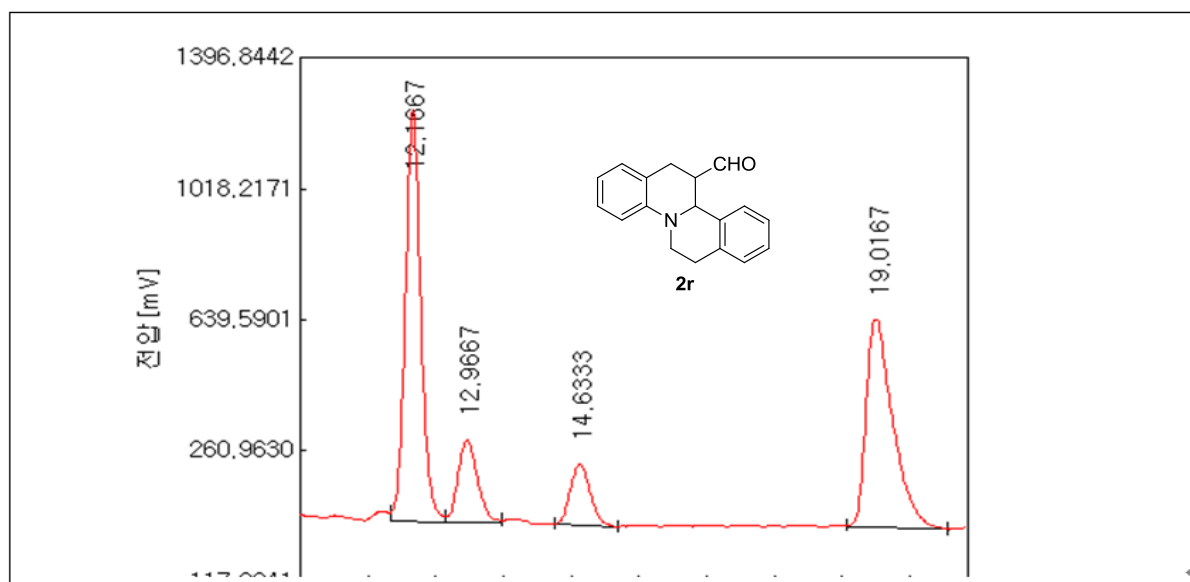

분석 결과

| 번호 | RT[분]   | 면적[mV*s]   | 형태 | 폭[초]    | 면적%     |
|----|---------|------------|----|---------|---------|
| 1  | 12.1667 | 19434.4534 | BV | 49.0000 | 43.0987 |
| 2  | 12.9667 | 4934.6017  | BV | 50.0000 | 10.9432 |
| 3  | 14.6333 | 3667.6977  | BV | 55.0000 | 8.1337  |
| 4  | 19.0167 | 17056.1186 | BB | 89.0000 | 37.8244 |

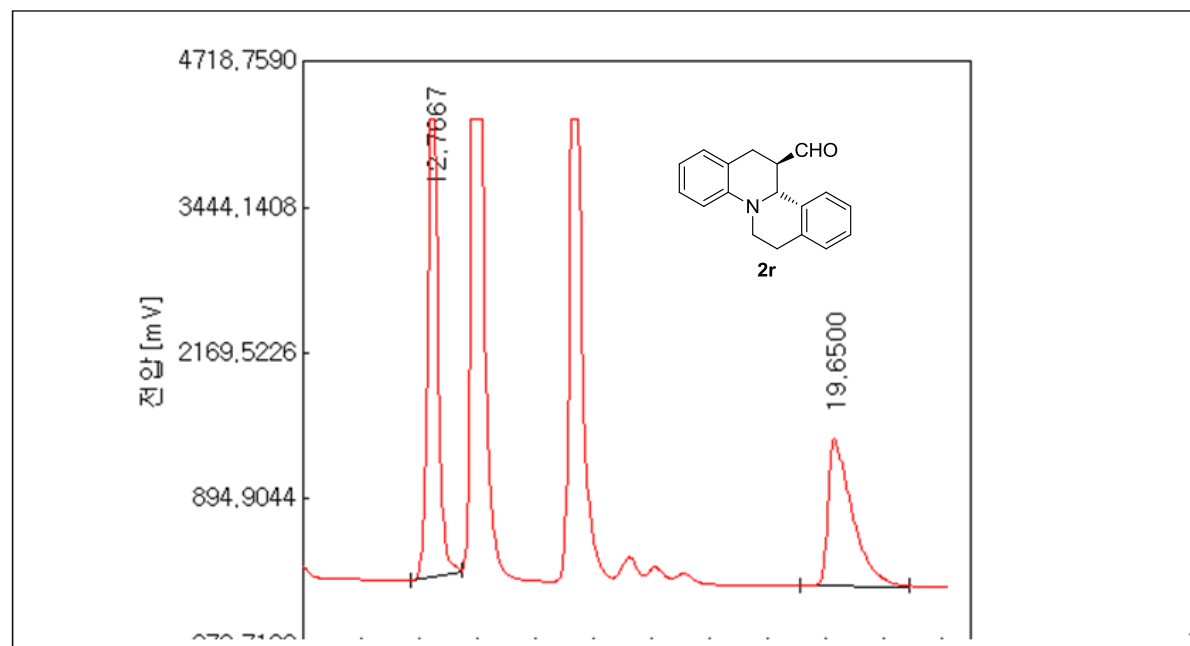

분석 결과

| 번호 | RT[분]   | 면적[mV*s]   | 형태 | 폭[초]     | 면적%     |
|----|---------|------------|----|----------|---------|
| 1  | 12.7667 | 54708.6472 | BB | 52.0000  | 58.7746 |
| 2  | 19.6500 | 38373.4720 | BB | 113.0000 | 41.2254 |

9.644  
9.640  
7.187  
7.185  
7.180  
7.176  
7.168  
7.165  
7.161  
7.156  
7.152  
7.146  
7.141  
7.129  
7.120  
7.108  
7.095  
7.090  
7.074  
7.072  
7.056  
7.052  
7.043  
7.025  
6.676  
6.656  
6.625  
6.623  
6.607  
6.604  
6.588  
6.586  
5.063  
5.047  
3.856  
3.854  
3.841  
3.839  
3.834  
3.318  
3.309  
3.305  
3.296  
3.280  
3.198  
3.159  
3.150  
3.147  
3.140  
3.135  
3.131  
3.123  
3.119  
3.117  
2.991  
2.980  
2.968  
2.953  
2.941  
2.933  
2.918  
2.906  
2.676  
2.665  
2.641

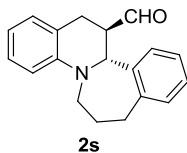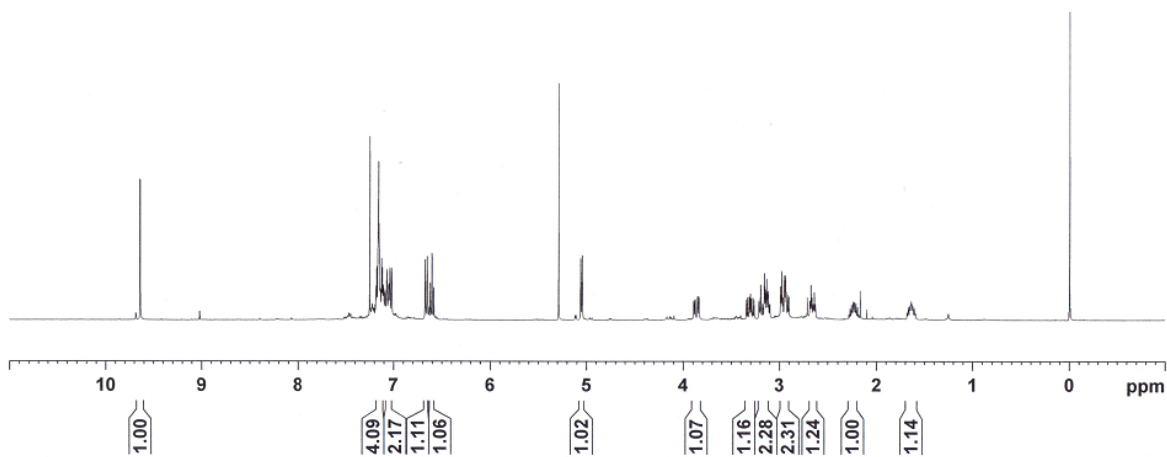

— 203.022

143.420  
139.631  
139.286  
130.808  
129.283  
127.860  
127.621  
126.549  
119.345  
116.076  
110.661

77.358  
77.041  
76.723

63.267

49.494  
46.334

31.880  
26.726  
24.730

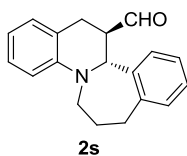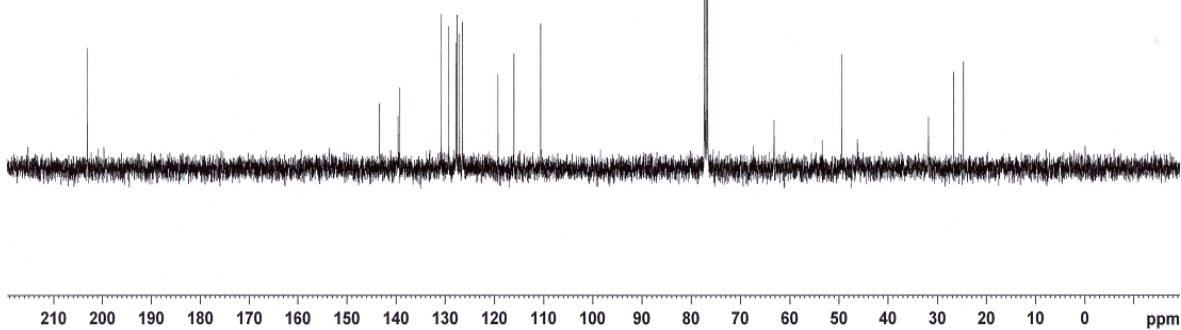

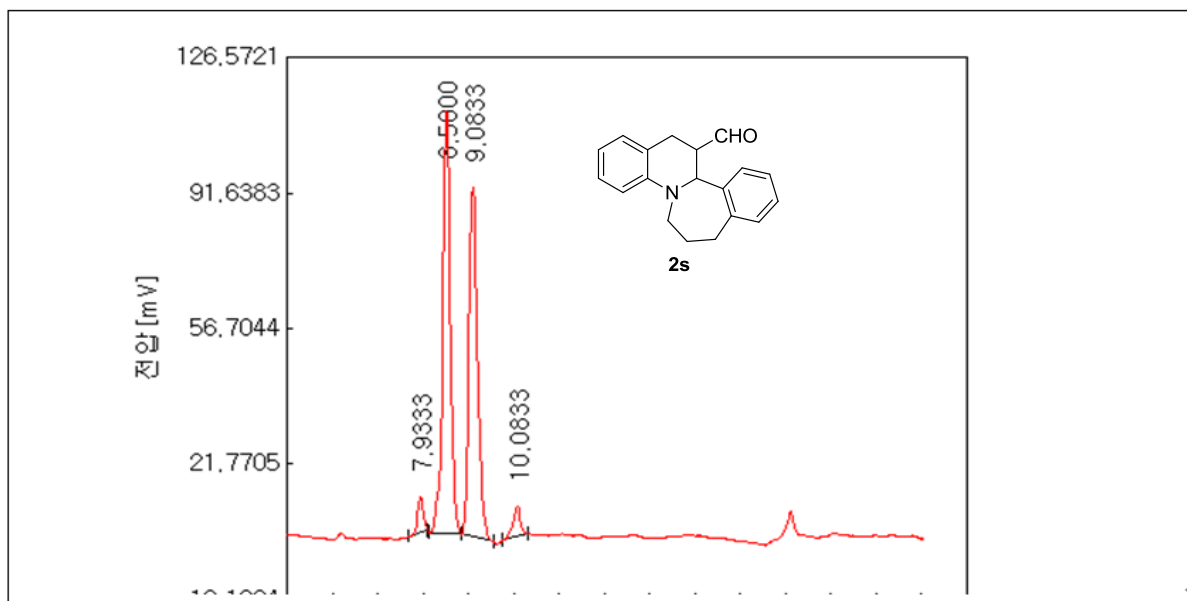

분석 결과

| 번호 | RT[분]   | 면적 [mV*s] | 형태 | 폭 [초]   | 면적%     |
|----|---------|-----------|----|---------|---------|
| 1  | 7.9333  | 85.6473   | FF | 25.0000 | 3.1472  |
| 2  | 8.5000  | 1313.3456 | FF | 42.0000 | 48.2605 |
| 3  | 9.0833  | 1232.2616 | FF | 43.0000 | 45.2810 |
| 4  | 10.0833 | 90.1105   | FF | 34.0000 | 3.3112  |

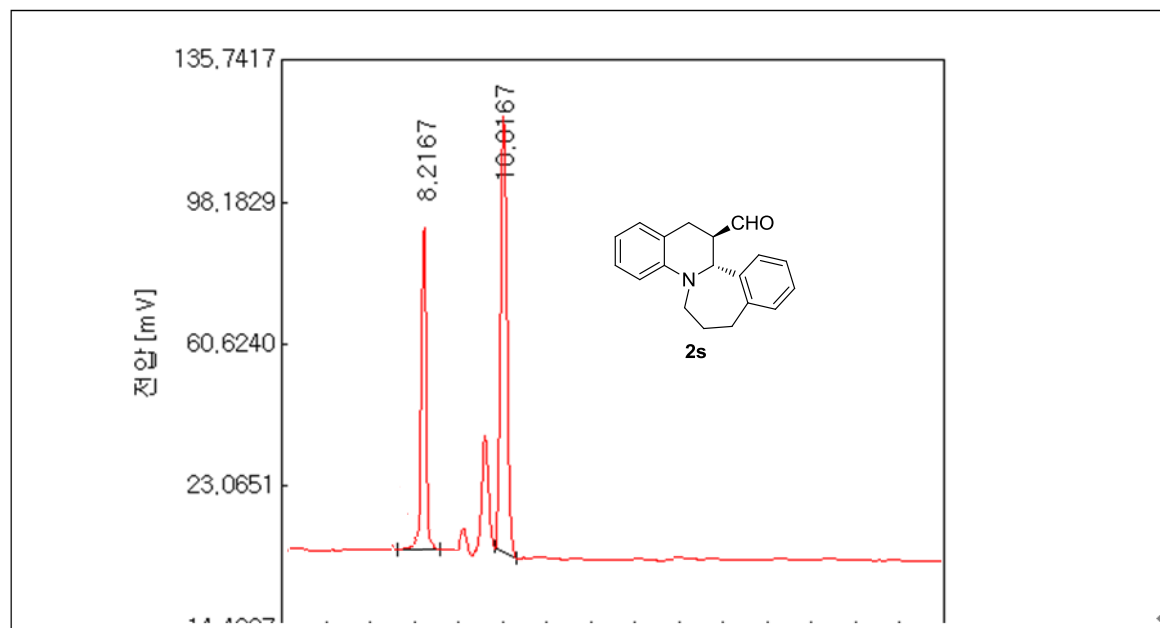

분석 결과

| 번호 | RT[분]   | 면적 [mV*s] | 형태 | 폭 [초]   | 면적%     |
|----|---------|-----------|----|---------|---------|
| 1  | 8.2167  | 620.1112  | BB | 20.0000 | 33.9485 |
| 2  | 10.0167 | 1206.5124 | BB | 31.0000 | 66.0515 |

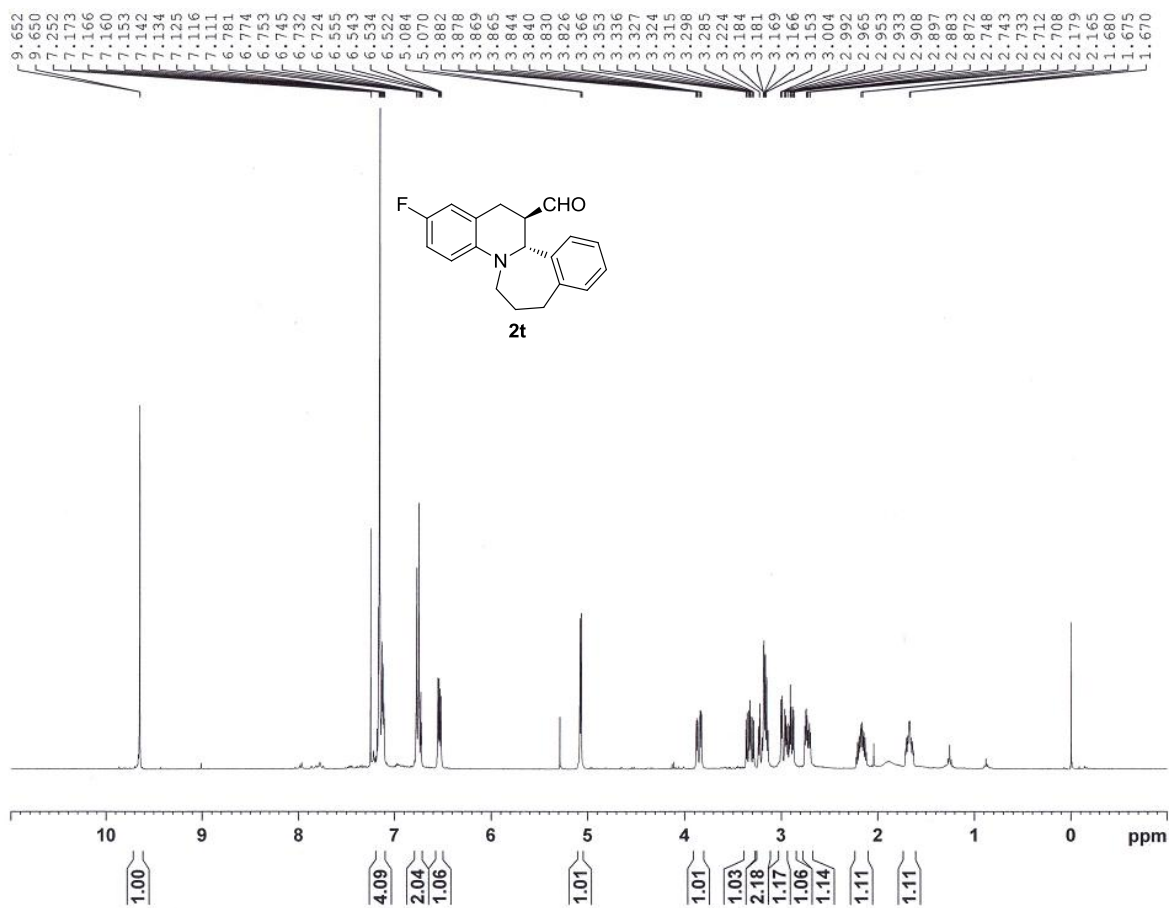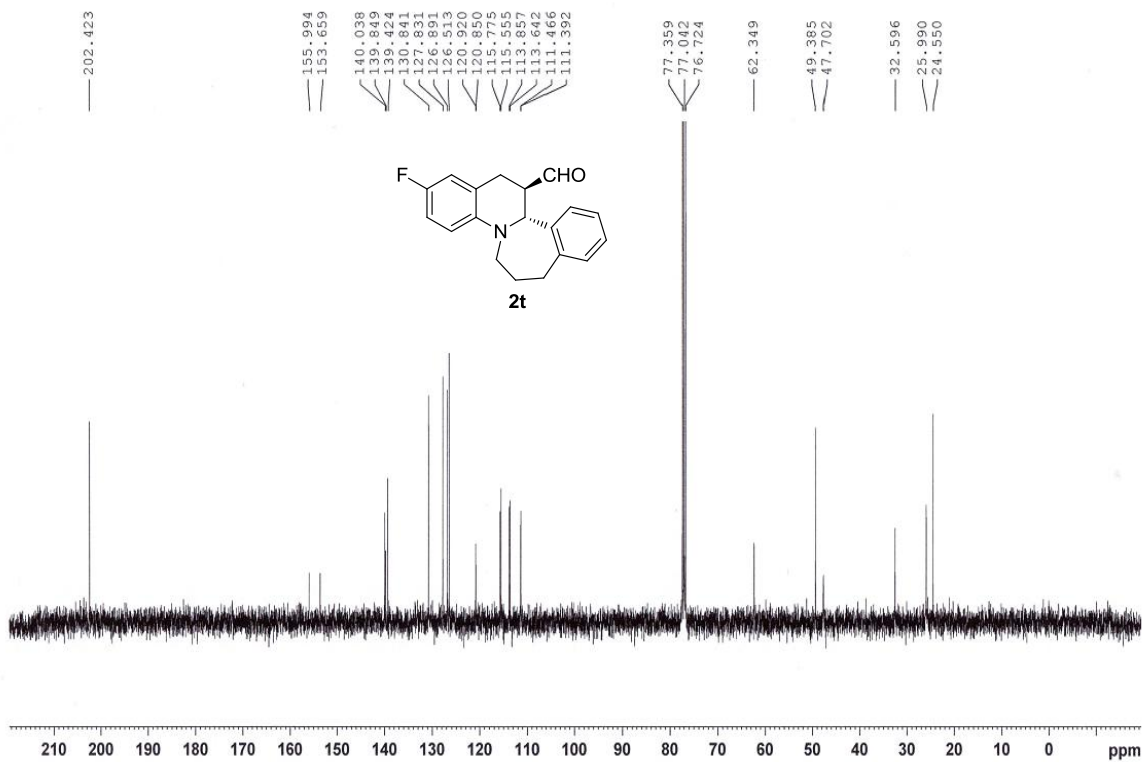

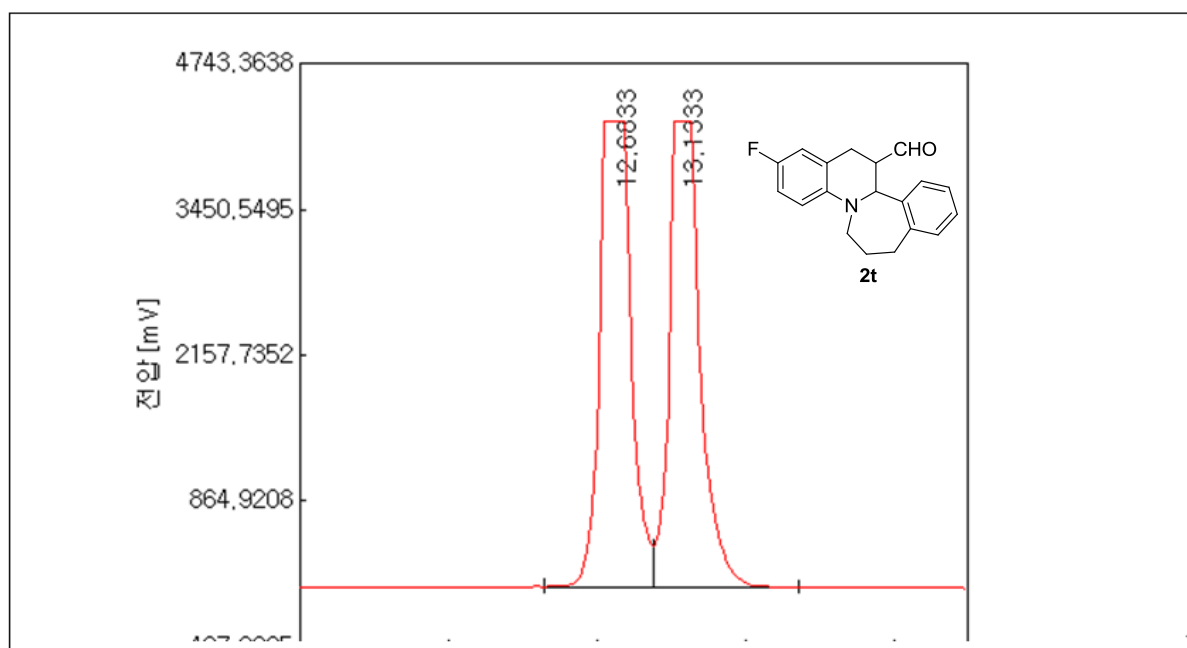

분석 결과

| 번호 | RT[분]   | 면적[mV*s]   | 형태 | 폭[초]    | 면적%     |
|----|---------|------------|----|---------|---------|
| 1  | 12.6833 | 64276.9990 | BV | 44.0000 | 50.3703 |
| 2  | 13.1333 | 63331.8893 | BB | 59.0000 | 49.6297 |

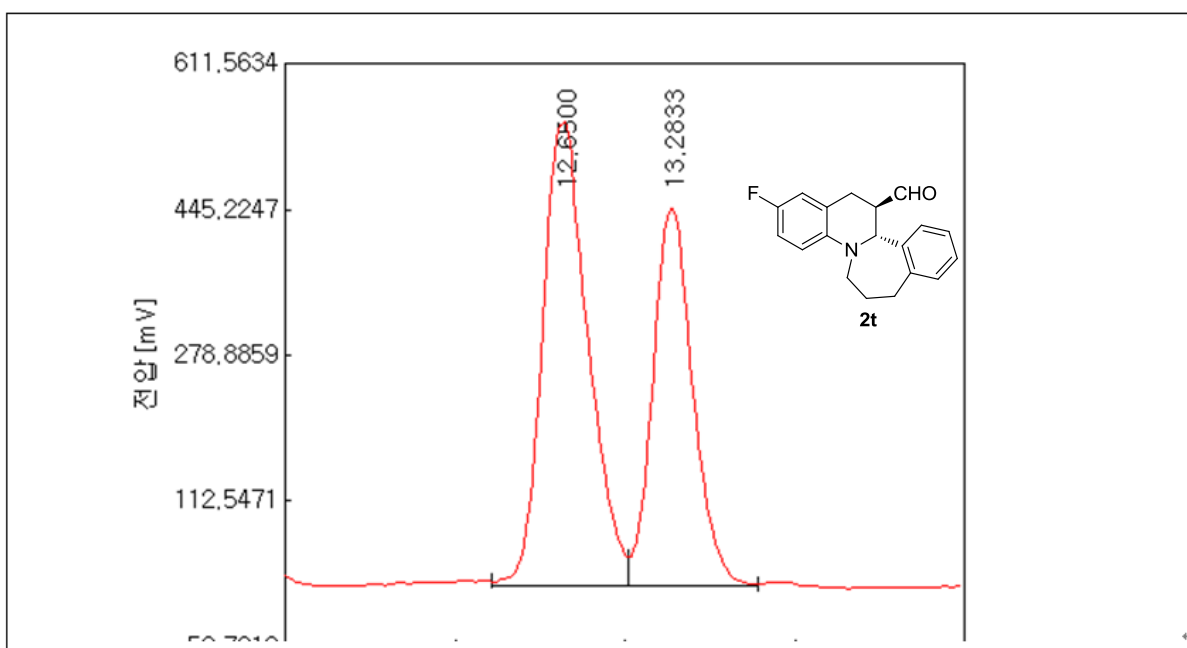

분석 결과

| 번호 | RT[분]   | 면적[mV*s]   | 형태 | 폭[초]    | 면적%     |
|----|---------|------------|----|---------|---------|
| 1  | 12.6500 | 10223.3796 | BV | 48.0000 | 58.2676 |
| 2  | 13.2833 | 7322.1752  | VB | 46.0000 | 41.7324 |
